# Supplementary material for: Copper(I)-catalyzed tandem reaction: synthesis of 1,4-disubstituted 1,2,3-triazoles from alkyl diacyl peroxides, azidotrimethylsilane, and alkynes
Source: publisher site journal article supplement (doi:10.3762/bjoc.14.270), 2018-11-23

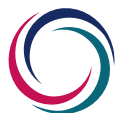

## Supporting Information

for

### **Copper(I)-catalyzed tandem reaction: synthesis of 1,4-disubstituted 1,2,3-triazoles from alkyl diacyl peroxides, azidotrimethylsilane, and alkynes**

Muhammad Israr, Changqing Ye, Munira Taj Muhammad, Yajun Li and Hongli Bao

*Beilstein J. Org. Chem.* **2018**, *14*, 2916–2922. [doi:10.3762/bjoc.14.270](https://doi.org/10.3762/bjoc.14.270)

### **Detailed experimental procedures and characterization data for all new compounds**

## Table of contents

|                                                                                                   |     |
|---------------------------------------------------------------------------------------------------|-----|
| Materials and methods .....                                                                       | S3  |
| General procedure for the synthesis of triazoles with LPO (for Scheme 2) .....                    | S4  |
| Synthesis of alkyl diacyl peroxides.....                                                          | S4  |
| General procedure for the synthesis of triazoles with alkyl diacyl peroxides (for Scheme 3) ..... | S5  |
| Characterization data for the products .....                                                      | S6  |
| Preliminary mechanistic studies .....                                                             | S20 |
| References .....                                                                                  | S22 |
| Copies of $^1\text{H}$ , $^{13}\text{C}$ , and $^{19}\text{F}$ NMR spectra .....                  | S23 |

## Materials and methods

All reactions were carried out in flame-dried glassware with magnetic stirring unless otherwise indicated. Commercially available reagents were used without further purification. Solvents were dried by distillation from sodium or  $\text{CaH}_2$ . Solutions and liquids were transferred with the help of syringe. Reactions were monitored by thin-layer chromatography.  $^1\text{H}$  and  $^{13}\text{C}$  NMR spectra were recorded on Bruker-BioSpin AVANCE III HD. Data for  $^1\text{H}$  NMR spectra are reported relative to chloroform as an internal standard (7.26 ppm) and are reported as follows: chemical shift (ppm), multiplicity, coupling constant (Hz), and integration. Data for  $^{13}\text{C}$  NMR spectra are reported relative to chloroform as an internal standard (77.16 ppm) and are reported in terms of chemical shift (ppm). All melting points were determined on a Beijing Science Instrument Dianguang Instrument Factory XT4B melting point apparatus and are uncorrected. IR data were obtained from Bruker VERTEX 70. HRMS data were recorded on Agilent Technologies 6224 TOF LC/MS.

## General procedure for the synthesis of triazoles with LPO (for Scheme 2)

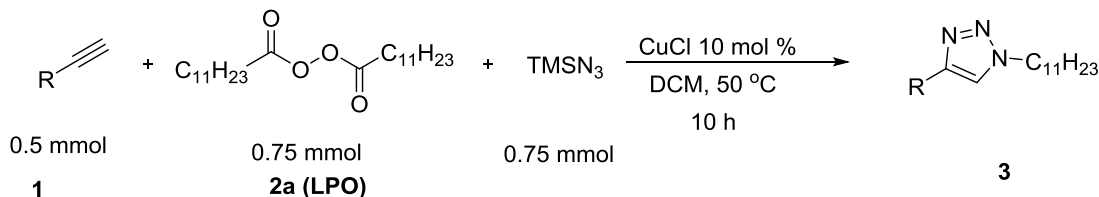

### Procedure:

To a flame-dried Schlenk tube containing a magnetic bar, terminal alkyne **1** (0.5 mmol), diacyl peroxide **2a** (0.75 mmol), TMSN<sub>3</sub> (90.4 mg, 0.75 mmol), CuCl (4.9 mg, 0.05 mmol) and CH<sub>2</sub>Cl<sub>2</sub> (2 mL) were added respectively. The reaction mixture was stirred vigorously for 10 hours at 50 °C. Then, the reaction mixture was cooled to room temperature, poured into saturated sodium bicarbonate solution (25 mL) and extracted with CH<sub>2</sub>Cl<sub>2</sub> (3 × 25 mL). After drying over MgSO<sub>4</sub>, the solvent was removed under reduced pressure by rotary evaporator, the residue was purified by column chromatography on silica gel (PE/EA) to afford **3**.

## Synthesis of alkyl diacyl peroxides

Diacyl peroxides were synthesized according to the reported literature.<sup>1,2</sup>

*Diacyl peroxides have potentials to explode. Any diacyl peroxide involved in the reaction (as product or substrate) should be carried out with precautions!*

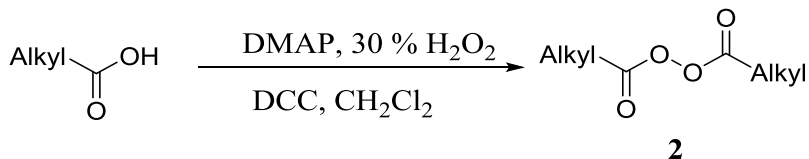

4-Dimethylaminopyridine (DMAP, 0.224g, 0.6 mmol), acid (6 mmol), hydrogen peroxide (30 % v/v in H<sub>2</sub>O, 7.5 mmol) and CH<sub>2</sub>Cl<sub>2</sub> were added to a 50 mL round bottom flask respectively. The reaction mixture was

cooled to  $-15\text{ }^{\circ}\text{C}$  for about 10 min and dicyclohexylcarbodiimide (DCC, 6.72 mmol) was added. Then, the mixture was stirred at  $-10$  to  $-15^{\circ}\text{C}$  for 1.5 hours. The solution was filtered with petroleum ether and dried over  $\text{MgSO}_4$ . After filtration the solvent was removed under reduced pressure at 10 to  $15\text{ }^{\circ}\text{C}$ . The residue (peroxide **2**) was used without further purification.

## General procedure for the synthesis of triazoles with alkyl diacyl peroxides (for Scheme 3)

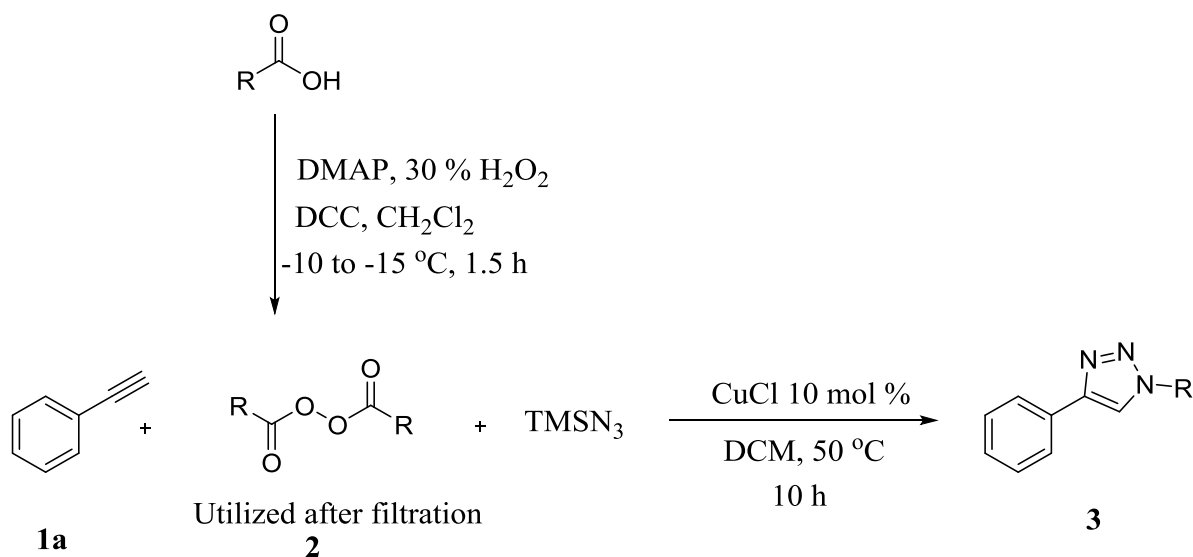

To an oven-dried Schlenk tube equipped with magnetic stirring bar, phenylacetylene (**1a**, 52.6 mg, 0.5 mmol), the above diacyl peroxide **2** (0.75 mmol),  $\text{TMSN}_3$  (90.4 mg, 0.75 mmol),  $\text{CuCl}$  (4.9 mg, 0.05 mmol) and  $\text{CH}_2\text{Cl}_2$  (2 mL) were added, respectively. The reaction mixture was stirred at  $50\text{ }^{\circ}\text{C}$  for 10 hours. Then, the reaction mixture was cooled to room temperature, poured into saturated sodium bicarbonate solution (25 mL) and extracted with  $\text{CH}_2\text{Cl}_2$  ( $3 \times 25\text{ mL}$ ). After drying over  $\text{MgSO}_4$ , the solvent was removed under reduced pressure, and the residue was purified by column chromatography on silica gel (PE/EA) to afford **3**.

## Characterization data for the products

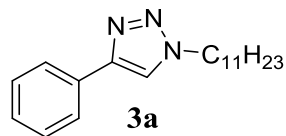

Following the general procedure for Scheme 2, **3a** was obtained as a yellowish solid (145 mg, 97% yield); mp. 85 – 86 °C; <sup>1</sup>H NMR (400 MHz, CDCl<sub>3</sub>) δ 7.87 – 7.77 (m, 2H), 7.74 (s, 1H), 7.39 (dd, *J* = 8.3, 6.8 Hz, 2H), 7.35 – 7.26 (m, 1H), 4.34 (t, *J* = 7.2 Hz, 2H), 1.90 (t, *J* = 7.1 Hz, 2H), 1.32 – 1.21 (m, 16H), 0.87 (t, *J* = 6.8 Hz, 3H); <sup>13</sup>C NMR (100 MHz, CDCl<sub>3</sub>) δ 147.66, 130.79, 128.82, 128.04, 125.68, 119.53, 50.42, 31.91, 30.36, 29.58, 29.54, 29.41, 29.33, 29.04, 26.51, 22.70, 14.14; IR (KBr): ν 2551, 2917, 2847, 1652, 1558, 1464, 1216, 1078 cm<sup>-1</sup>; HRMS (ESI) calcd for [C<sub>19</sub>H<sub>29</sub>N<sub>3</sub>Na]<sup>+</sup> ([M+Na]<sup>+</sup>): 322.2254, found: 322.2254.

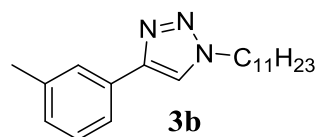

Following the general procedure for Scheme 2, **3b** was obtained as a dull-white solid (130 mg, 83% yield); mp. 66 – 67 °C. <sup>1</sup>H NMR (400 MHz, CDCl<sub>3</sub>) δ 7.72 (s, 1H), 7.69 (d, *J* = 2.0 Hz, 1H), 7.60 (d, *J* = 7.7 Hz, 1H), 7.31 (t, *J* = 7.6 Hz, 1H), 7.14 (d, *J* = 7.6 Hz, 1H), 4.38 (t, *J* = 7.2 Hz, 2H), 2.40 (s, 3H), 1.94 (t, *J* = 7.2 Hz, 2H), 1.34 – 1.25 (m, 16H), 0.87 (t, *J* = 6.8 Hz, 3H); <sup>13</sup>C NMR (100 MHz, CDCl<sub>3</sub>) δ 147.96, 138.63, 130.74, 128.96, 128.84, 126.51, 122.91, 119.46, 50.56, 32.01, 30.49, 29.64, 29.51, 29.42, 29.15, 26.63, 22.80, 21.56, 14.24; IR (KBr): ν 2952, 2916, 2847, 1699, 1541, 1466, 1220, 1024 cm<sup>-1</sup>; HRMS (ESI) calcd for [C<sub>20</sub>H<sub>31</sub>N<sub>3</sub>Na]<sup>+</sup> ([M+Na]<sup>+</sup>): 336.2410, found: 336.2409.

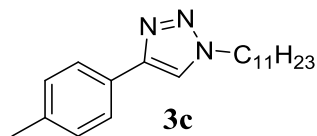

Following the general procedure for Scheme 2, **3c** was obtained as a white solid (140 mg, 86% yield); mp. 86 – 87 °C; <sup>1</sup>H NMR (400 MHz, CDCl<sub>3</sub>) δ 7.78 – 7.65 (m, 3H), 7.21 (d, *J* = 7.8 Hz, 2H), 4.35 (t, *J* = 7.2 Hz, 2H), 2.37 (s, 3H), 1.91 (t, *J* = 7.1 Hz, 2H), 1.33 – 1.22 (m, 16H), 0.87 (t, *J* = 6.7 Hz, 3H); <sup>13</sup>C NMR (100 MHz, CDCl<sub>3</sub>) δ 147.82, 137.92, 129.55, 128.01, 125.65, 119.18, 50.46, 31.96, 30.43, 29.63, 29.59, 29.46, 29.37, 29.09, 26.58, 22.74, 21.34, 14.18; IR (KBr): ν 2951, 2917, 2847, 1652, 1541, 1461, 1216, 1075 cm<sup>-1</sup>; HRMS (ESI) calcd for [C<sub>20</sub>H<sub>31</sub>N<sub>3</sub>Na]<sup>+</sup> ([M+Na]<sup>+</sup>): 336.2410, found: 336.2412.

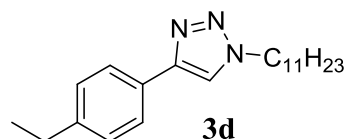

Following the general procedure for Scheme 2, **3d** was obtained as a light brown solid (125 mg, 76% yield); mp. 69 – 70 °C;  $^1\text{H}$  NMR (400 MHz,  $\text{CDCl}_3$ )  $\delta$  7.76 (d,  $J$  = 8.2 Hz, 2H), 7.71 (s, 1H), 7.28 (d,  $J$  = 2.5 Hz, 2H), 4.39 (t,  $J$  = 7.2 Hz, 2H), 2.69 (q,  $J$  = 7.6 Hz, 2H), 1.95 (t,  $J$  = 7.1 Hz, 2H), 1.35 – 1.25 (m, 19H), 0.91 – 0.87 (m, 3H);  $^{13}\text{C}$  NMR (100 MHz,  $\text{CDCl}_3$ )  $\delta$  146.95, 143.44, 127.45, 127.28, 124.83, 118.19, 49.55, 31.02, 29.50, 28.69, 28.65, 28.52, 28.43, 28.16, 27.81, 25.64, 21.81, 14.66, 13.24; IR (KBr):  $\nu$  2953, 2917, 2847, 1699, 1541, 1457, 1217, 1076  $\text{cm}^{-1}$ ; HRMS (ESI) calcd for  $[\text{C}_{21}\text{H}_{33}\text{N}_3\text{Na}]^+$  ( $[\text{M}+\text{Na}]^+$ ): 350.2567, found: 350.2563.

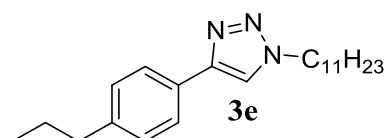

Following the general procedure for Scheme 2, **3e** was obtained as a yellow solid (133 mg, 78% yield); mp. 61 – 62 °C;  $^1\text{H}$  NMR (400 MHz,  $\text{CDCl}_3$ )  $\delta$  7.74 (d,  $J$  = 8.2 Hz, 2H), 7.70 (s, 1H), 7.23 (d,  $J$  = 8.1 Hz, 2H), 4.38 (t,  $J$  = 7.2 Hz, 2H), 2.63 (t,  $J$  = 7.4 Hz, 2H), 1.94 (t,  $J$  = 7.3 Hz, 2H), 1.69 – 1.63 (m, 2H), 1.33 – 1.25 (m, 16H), 0.95 (t,  $J$  = 7.3 Hz, 3H), 0.87 (t,  $J$  = 6.8 Hz, 3H);  $^{13}\text{C}$  NMR (100 MHz,  $\text{CDCl}_3$ )  $\delta$  147.96, 142.88, 129.06, 128.26, 125.73, 119.19, 50.55, 37.95, 32.02, 30.49, 29.68, 29.65, 29.52, 29.43, 29.15, 26.64, 24.62, 22.80, 14.24, 13.92; IR (KBr):  $\nu$  2956, 2921, 2851, 1733, 1558, 1465, 1363, 1222  $\text{cm}^{-1}$ ; HRMS (ESI) calcd for  $[\text{C}_{22}\text{H}_{35}\text{N}_3\text{Na}]^+$  ( $[\text{M}+\text{Na}]^+$ ): 364.2723, found: 364.2723.

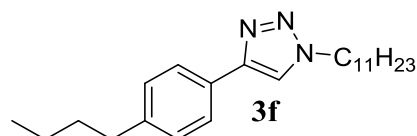

Following the general procedure for Scheme 2, **3f** was obtained as a yellow solid (165 mg, 85% yield); mp. 73 – 74 °C;  $^1\text{H}$  NMR (400 MHz,  $\text{CDCl}_3$ )  $\delta$  7.79 – 7.65 (m, 3H), 7.23 (d,  $J$  = 8.1 Hz, 2H), 4.37 (t,  $J$  = 7.4 Hz, 2H), 2.63 (t,  $J$  = 7.4 Hz, 2H), 1.93 (t,  $J$  = 6.9 Hz, 2H), 1.62 (p,  $J$  = 7.5 Hz, 2H), 1.39 – 1.24 (m, 18H), 0.90 (m, 6H);  $^{13}\text{C}$  NMR (100 MHz,  $\text{CDCl}_3$ )  $\delta$  147.91, 143.06, 128.97, 128.22, 125.70, 119.19, 50.50, 35.54, 33.67, 31.99, 30.46, 29.66, 29.62, 29.49, 29.41, 29.12, 26.60, 22.78, 22.44, 14.21, 14.06; IR (KBr):  $\nu$  2953, 2817, 2847, 1709, 1463, 1216, 1077  $\text{cm}^{-1}$ ; HRMS (EI) calcd for  $[\text{C}_{23}\text{H}_{38}\text{N}_3][\text{M}+\text{H}]^+$ : 356.3060, found: 356.3061.

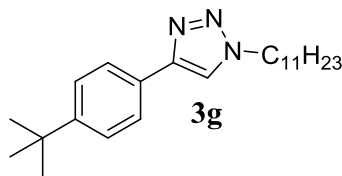

Following the general procedure for Scheme 2, **3g** was obtained as a yellow solid (118 mg, 66% yield); mp. 47 –48 °C;  $^1\text{H}$  NMR (400 MHz,  $\text{CDCl}_3$ )  $\delta$  7.76 (d,  $J$  = 8.4 Hz, 2H), 7.70 (s, 1H), 7.45 (d,  $J$  = 8.4 Hz, 2H), 4.38 (t,  $J$  = 7.2 Hz, 2H), 1.95 (t,  $J$  = 7.1 Hz, 2H), 1.36 (d,  $J$  = 36.4 Hz, 25H), 0.87 (t,  $J$  = 6.7 Hz, 3H);  $^{13}\text{C}$  NMR (100 MHz,  $\text{CDCl}_3$ )  $\delta$  151.30, 147.84, 128.05, 125.87, 125.56, 119.23, 50.54, 34.79, 32.02, 31.43, 30.49, 29.69, 29.64, 29.52, 29.43, 29.15, 26.63, 22.81, 14.24; IR (KBr):  $\nu$  2953, 2917, 2847, 1684, 1541, 1457, 1217, 1076  $\text{cm}^{-1}$ ; HRMS (ESI) calcd for  $[\text{C}_{23}\text{H}_{37}\text{N}_3\text{Na}]^+$  ( $[\text{M}+\text{Na}]^+$ ): 378.2880, found: 378.2881.

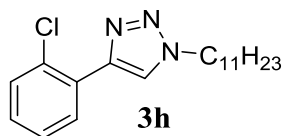

Following the general procedure for Scheme 2, **3h** was obtained as a brown solid (130 mg, 78% yield); mp. 56 –57 °C;  $^1\text{H}$  NMR (400 MHz,  $\text{CDCl}_3$ )  $\delta$  8.26 (dd,  $J$  = 7.8, 1.8 Hz, 1H), 8.16 (s, 1H), 7.45 (dd,  $J$  = 8.0, 1.3 Hz, 1H), 7.37 (td,  $J$  = 7.6, 1.4 Hz, 1H), 7.27 (dd,  $J$  = 7.7, 5.9 Hz, 1H), 4.42 (t,  $J$  = 7.3 Hz, 2H), 1.94 (t,  $J$  = 7.3 Hz, 2H), 1.35 – 1.26 (m, 16H), 0.88 (t,  $J$  = 6.8 Hz, 3H);  $^{13}\text{C}$  NMR (100 MHz,  $\text{CDCl}_3$ )  $\delta$  144.04, 131.27, 130.30, 129.95, 129.53, 129.06, 127.31, 123.22, 50.62, 32.02, 30.48, 29.69, 29.64, 29.52, 29.44, 29.14, 26.63, 22.81, 14.25; IR (KBr):  $\nu$  2920, 2853, 1715, 1507, 1489, 1058, 759  $\text{cm}^{-1}$ ; HRMS (ESI) calcd for  $[\text{C}_{19}\text{H}_{28}\text{ClN}_3\text{Na}]^+$  ( $[\text{M}+\text{Na}]^+$ ): 356.1864, found: 356.1866.

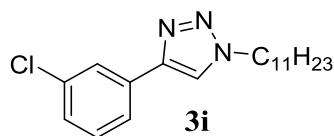

Following the general procedure for Scheme 2, **3i** was obtained as a white solid (151 mg, 91% yield); mp. 79 –80 °C;  $^1\text{H}$  NMR (400 MHz,  $\text{CDCl}_3$ )  $\delta$  7.82 (d,  $J$  = 2.0 Hz, 1H), 7.75 (s, 1H), 7.72 (d,  $J$  = 7.6 Hz, 1H), 7.34 (t,  $J$  = 7.8 Hz, 1H), 7.29 (d,  $J$  = 8.0 Hz, 1H), 4.39 (t,  $J$  = 7.3 Hz, 2H), 1.94 (t,  $J$  = 7.1 Hz, 2H), 1.34 – 1.25 (m, 16H), 0.87 (t,  $J$  = 6.7 Hz, 3H);  $^{13}\text{C}$  NMR (100 MHz,  $\text{CDCl}_3$ )  $\delta$  146.55, 134.89, 132.64, 130.23, 128.15, 125.86, 123.85, 119.89, 50.65, 32.00, 30.44, 29.66, 29.62, 29.49, 29.41, 29.11, 26.60, 22.79, 14.22; IR (KBr):  $\nu$  2917, 2847, 1670, 1575, 1489, 1070, 792  $\text{cm}^{-1}$ ; HRMS (ESI) calcd for  $[\text{C}_{19}\text{H}_{28}\text{ClN}_3\text{Na}]^+$  ( $[\text{M}+\text{Na}]^+$ ): 356.1864, found: 356.1863.



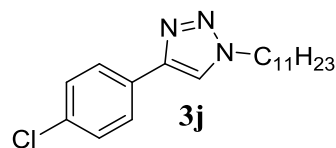

Following the general procedure for Scheme 2, **3j** was obtained as a light yellow solid (153 mg, 92% yield); mp. 97 – 98 °C;  $^1\text{H}$  NMR (400 MHz,  $\text{CDCl}_3$ )  $\delta$  7.76 (d,  $J$  = 8.5 Hz, 2H), 7.73 (s, 1H), 7.38 (d,  $J$  = 8.5 Hz, 2H), 4.38 (t,  $J$  = 7.2 Hz, 2H), 1.93 (t,  $J$  = 7.2 Hz, 2H), 1.34 – 1.24 (m, 16H), 0.87 (t,  $J$  = 6.7 Hz, 3H);  $^{13}\text{C}$  NMR (100 MHz,  $\text{CDCl}_3$ )  $\delta$  146.79, 133.91, 129.39, 129.14, 127.04, 119.58, 50.63, 32.00, 30.46, 29.67, 29.63, 29.49, 29.41, 29.13, 26.62, 22.79, 14.23; IR (KBr):  $\nu$  2916, 2845, 1684, 1558, 1457, 1075, 827  $\text{cm}^{-1}$ ; HRMS (ESI) calcd for  $[\text{C}_{19}\text{H}_{28}\text{ClN}_3\text{Na}]^+$  ( $[\text{M}+\text{Na}]^+$ ): 356.1864, found: 356.1865.

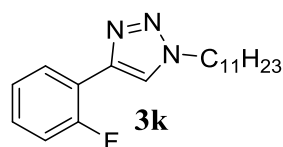

Following the general procedure for Scheme 2, **3k** was obtained as a brown solid (121 mg, 76% yield); mp. 52 – 53 °C;  $^1\text{H}$  NMR (400 MHz,  $\text{CDCl}_3$ )  $\delta$  8.32 (td,  $J$  = 7.6, 2.0 Hz, 1H), 7.93 (d,  $J$  = 3.8 Hz, 1H), 7.33 – 7.22 (m, 2H), 7.14 (ddd,  $J$  = 11.2, 8.0, 1.5 Hz, 1H), 4.42 (t,  $J$  = 7.2 Hz, 2H), 1.92 (t,  $J$  = 7.2 Hz, 2H), 1.35 – 1.26 (m, 16H), 0.88 (t,  $J$  = 6.8 Hz, 3H);  $^{13}\text{C}$  NMR (100 MHz,  $\text{CDCl}_3$ )  $\delta$  159.33 (d,  $J$  = 247.4 Hz), 141.20, 129.31 (d,  $J$  = 8.7 Hz), 127.89 (d,  $J$  = 3.6 Hz), 124.73 (d,  $J$  = 3.0 Hz), 122.70 (d,  $J$  = 12.6 Hz), 118.81 (d,  $J$  = 13.1 Hz), 115.74 (d,  $J$  = 21.9 Hz), 50.57, 32.00, 30.46, 29.68, 29.63, 29.50, 29.42, 29.12, 26.60, 22.80, 14.24;  $^{19}\text{F}$  NMR (376 MHz,  $\text{CDCl}_3$ )  $\delta$  -114.97 (s, 1F); IR (KBr):  $\nu$  2954, 2918, 2851, 1557, 1469, 1227, 1074  $\text{cm}^{-1}$ ; HRMS (ESI) calcd for  $[\text{C}_{19}\text{H}_{28}\text{FN}_3\text{Na}]^+$  ( $[\text{M}+\text{Na}]^+$ ): 340.2159, found: 340.2160.

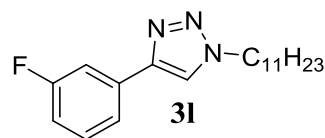

Following the general procedure for Scheme 2, **3l** was obtained as a bright white solid (138 mg, 87% yield); mp. 73 – 74 °C;  $^1\text{H}$  NMR (400 MHz,  $\text{CDCl}_3$ )  $\delta$  7.76 (s, 1H), 7.62 – 7.52 (m, 2H), 7.37 (td,  $J$  = 8.0, 5.9 Hz, 1H), 7.01 (td,  $J$  = 8.5, 2.6 Hz, 1H), 4.39 (t,  $J$  = 7.2 Hz, 2H), 1.94 (t,  $J$  = 7.1 Hz, 2H), 1.34 – 1.25 (m, 16H), 0.87 (t,  $J$  = 6.7 Hz, 3H);  $^{13}\text{C}$  NMR (100 MHz,  $\text{CDCl}_3$ )  $\delta$  163.29 (d,  $J$  = 245.7 Hz), 146.75 (d,  $J$  = 2.9 Hz), 133.03 (d,  $J$  = 8.6 Hz), 130.50 (d,  $J$  = 8.2 Hz), 121.37 (d,  $J$  = 2.9 Hz), 119.91, 114.95 (d,  $J$  = 21.2 Hz), 112.70 (d,  $J$  = 23.0 Hz), 50.63, 31.99, 30.43, 29.66, 29.61, 29.48, 29.40, 29.11, 26.59, 22.77, 14.21;  $^{19}\text{F}$  NMR (376 MHz,  $\text{CDCl}_3$ )  $\delta$  -112.74 (s, 1F); IR (KBr):  $\nu$  2951, 2916, 2847, 1588, 1465, 1217, 1156  $\text{cm}^{-1}$ ; HRMS (ESI) calcd for  $[\text{C}_{19}\text{H}_{28}\text{FN}_3\text{Na}]^+$  ( $[\text{M}+\text{Na}]^+$ ): 340.2159, found: 340.2159.

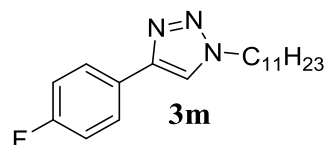

Following the general procedure for Scheme 2, **3m** was obtained as a light yellow solid (141 mg, 89% yield); mp. 89.4 – 90.4 °C;  $^1\text{H}$  NMR (400 MHz,  $\text{CDCl}_3$ )  $\delta$  7.86 – 7.73 (m, 2H), 7.70 (s, 1H), 7.11 (t,  $J$  = 8.5 Hz, 2H), 4.38 (t,  $J$  = 7.3 Hz, 2H), 1.94 (t,  $J$  = 7.1 Hz, 2H), 1.33 – 1.25 (m, 16H), 0.87 (t,  $J$  = 6.7 Hz, 3H);  $^{13}\text{C}$  NMR (100 MHz,  $\text{CDCl}_3$ )  $\delta$  162.76 (d,  $J$  = 247.2 Hz), 147.01, 127.54 (d,  $J$  = 8.1 Hz), 127.10 (d,  $J$  = 3.2 Hz), 119.26, 115.93 (d,  $J$  = 21.9 Hz), 50.62, 32.01, 30.48, 29.68, 29.64, 29.51, 29.43, 29.14, 26.63, 22.80, 14.24;  $^{19}\text{F}$  NMR (376 MHz,  $\text{CDCl}_3$ )  $\delta$  -113.72 (s, 1F); IR (KBr):  $\nu$  2917, 2846, 1716, 1636, 1521, 1454, 1339  $\text{cm}^{-1}$ ; HRMS (ESI) calcd for  $[\text{C}_{19}\text{H}_{28}\text{FN}_3\text{Na}]^+$  ( $[\text{M}+\text{Na}]^+$ ): 340.2159, found: 340.2156.

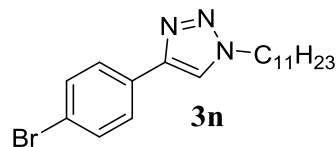

Following the general procedure for Scheme 2, **3n** was obtained as a clear white solid (152 mg, 80% yield), mp. 87 – 88 °C;  $^1\text{H}$  NMR (400 MHz,  $\text{CDCl}_3$ )  $\delta$  7.74 (s, 1H), 7.70 (d,  $J$  = 8.4 Hz, 2H), 7.54 (d,  $J$  = 8.3 Hz, 2H), 4.38 (t,  $J$  = 7.2 Hz, 2H), 1.90 (t,  $J$  = 7.2 Hz, 2H), 1.34 – 1.25 (m, 16H), 0.87 (t,  $J$  = 6.7 Hz, 3H);  $^{13}\text{C}$  NMR (100 MHz,  $\text{CDCl}_3$ )  $\delta$  146.77, 132.06, 129.82, 127.31, 122.02, 119.61, 50.62, 31.98, 30.04, 29.65, 29.61, 29.48, 29.40, 29.10, 26.60, 22.77, 14.22; IR (KBr):  $\nu$  2917, 2847, 1684, 1541, 1457, 1072, 825  $\text{cm}^{-1}$ ; HRMS (ESI) calcd for  $[\text{C}_{19}\text{H}_{28}\text{BrN}_3\text{Na}]^+$  ( $[\text{M}+\text{Na}]^+$ ): 400.1359, found: 400.1357.

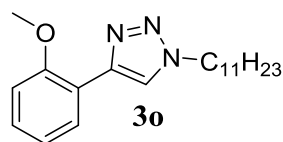

Following the general procedure for Scheme 2, **3o** was obtained as a light yellow semi solid (130 mg, 79% yield);  $^1\text{H}$  NMR (400 MHz,  $\text{CDCl}_3$ )  $\delta$  8.34 (dd,  $J$  = 7.7, 1.8 Hz, 1H), 8.01 (s, 1H), 7.31 (ddd,  $J$  = 8.3, 7.3, 1.8 Hz, 1H), 7.08 (td,  $J$  = 7.5, 1.1 Hz, 1H), 6.98 (dd,  $J$  = 8.3, 1.0 Hz, 1H), 4.39 (t,  $J$  = 7.3 Hz, 2H), 3.94 (s, 3H), 1.95 (t,  $J$  = 7.3 Hz, 2H), 1.34 – 1.23 (m, 16H), 0.87 (t,  $J$  = 6.8 Hz, 3H);  $^{13}\text{C}$  NMR (100 MHz,  $\text{CDCl}_3$ )  $\delta$  155.72, 143.17, 128.92, 127.81, 123.02, 121.21, 119.71, 110.90, 55.51, 50.39, 32.02, 30.55, 29.69, 29.66, 29.55, 29.44, 29.18, 26.67, 22.81, 14.24; IR (KBr):  $\nu$  2925, 2853, 1550, 1490, 1247, 1181, 1026  $\text{cm}^{-1}$ ; HRMS (ESI) calcd for  $[\text{C}_{20}\text{H}_{31}\text{N}_3\text{NaO}]^+$  ( $[\text{M}+\text{Na}]^+$ ): 352.2359, found: 352.2359.

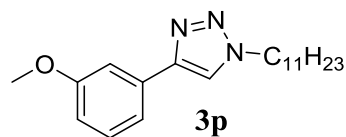

Following the general procedure for Scheme 2, **3p** was obtained as a golden yellow solid (134 mg, 81% yield); mp. 44 – 45 °C;  $^1\text{H}$  NMR (400 MHz,  $\text{CDCl}_3$ )  $\delta$  7.73 (s, 1H), 7.44 (dd,  $J = 2.6, 1.5$  Hz, 1H), 7.36 – 7.27 (m, 2H), 6.86 (ddd,  $J = 7.9, 2.7, 1.3$  Hz, 1H), 4.35 (t,  $J = 7.2$  Hz, 2H), 3.84 (s, 3H), 1.91 (t,  $J = 7.2$  Hz, 2H), 1.31 – 1.24 (m, 16H), 0.86 (t,  $J = 6.8$  Hz, 3H);  $^{13}\text{C}$  NMR (100 MHz,  $\text{CDCl}_3$ )  $\delta$  160.10, 147.61, 132.13, 129.90, 119.72, 118.13, 114.21, 110.26, 55.39, 50.49, 31.95, 30.40, 29.61, 29.58, 29.45, 29.36, 29.07, 26.55, 22.73, 14.17; IR (KBr):  $\nu$  2954, 2919, 2848, 1647, 1456, 1232, 1042  $\text{cm}^{-1}$ ; HRMS (ESI) calcd for  $[\text{C}_{20}\text{H}_{31}\text{N}_3\text{NaO}]^+$  ( $[\text{M}+\text{Na}]^+$ ): 352.2359, found: 352.2360.

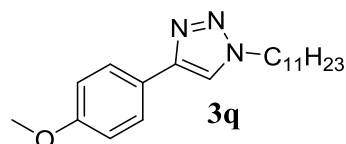

Following the general procedure for Scheme 2, **3q** was obtained as a light yellow solid (126 mg, 77% yield); mp. 66.5 – 67.5 °C;  $^1\text{H}$  NMR (400 MHz,  $\text{CDCl}_3$ )  $\delta$  7.82 – 7.71 (m, 2H), 7.65 (s, 1H), 7.01 – 6.90 (m, 2H), 4.37 (t,  $J = 7.2$  Hz, 2H), 3.84 (s, 3H), 1.93 (t,  $J = 7.2$  Hz, 2H), 1.33 – 1.23 (m, 16H), 0.87 (t,  $J = 6.8$  Hz, 3H);  $^{13}\text{C}$  NMR (100 MHz,  $\text{CDCl}_3$ )  $\delta$  159.67, 147.71, 127.11, 132.61, 118.72, 114.35, 55.45, 50.53, 32.01, 30.50, 29.68, 29.64, 29.51, 29.42, 29.15, 26.64, 22.80, 14.24; IR (KBr):  $\nu$  2952, 2917, 2846, 1647, 1541, 1457, 1021  $\text{cm}^{-1}$ ; HRMS (ESI) calcd for  $[\text{C}_{20}\text{H}_{31}\text{N}_3\text{NaO}]^+$  ( $[\text{M}+\text{Na}]^+$ ): 352.2359, found: 352.2363.

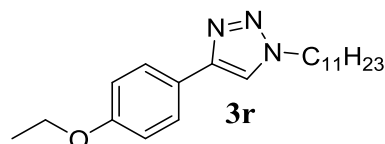

Following the general procedure for Scheme 2, **3r** was obtained as a bright white solid (125 mg, 73% yield); mp. 102 – 103 °C;  $^1\text{H}$  NMR (400 MHz,  $\text{CDCl}_3$ )  $\delta$  7.75 – 7.68 (m, 2H), 7.64 (s, 1H), 6.95 – 6.88 (m, 2H), 4.33 (t,  $J = 7.2$  Hz, 2H), 4.04 (q,  $J = 7.0$  Hz, 2H), 1.90 (t,  $J = 7.2$  Hz, 2H), 1.40 (t,  $J = 7.0$  Hz, 3H), 1.33 – 1.20 (m, 16H), 0.86 (t,  $J = 6.8$  Hz, 3H);  $^{13}\text{C}$  NMR (100 MHz,  $\text{CDCl}_3$ )  $\delta$  158.96, 147.64, 127.00, 123.40, 118.69, 114.81, 63.53, 50.41, 31.94, 30.41, 29.61, 29.58, 29.45, 29.36, 29.08, 26.56, 22.72, 14.87, 14.16; IR (KBr):  $\nu$  2975, 2917, 2846, 1652, 1465, 1250, 1114  $\text{cm}^{-1}$ ; HRMS (EI) calcd for  $[\text{C}_{23}\text{H}_{34}\text{N}_3\text{O}]^+$  ( $[\text{M}+\text{H}]^+$ ): 344.2696, found: 344.2693.

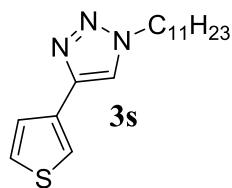

Following the general procedure for Scheme 2, **3s** was obtained as a bright white solid (116 mg, 76% yield); mp. 94 – 95 °C; <sup>1</sup>H NMR (400 MHz, CDCl<sub>3</sub>) δ 7.66 (dd, *J* = 2.9, 1.3 Hz, 1H), 7.64 (s, 1H), 7.45 (dd, *J* = 5.0, 1.3 Hz, 1H), 7.36 (dd, *J* = 5.0, 3.0 Hz, 1H), 4.36 (t, *J* = 7.2 Hz, 2H), 1.91 (t, *J* = 7.2 Hz, 2H), 1.33 – 1.22 (m, 16H), 0.87 (t, *J* = 6.8 Hz, 3H); <sup>13</sup>C NMR (100 MHz, CDCl<sub>3</sub>) δ 143.96, 132.04, 126.36, 125.89, 120.99, 119.35, 50.47, 31.97, 30.43, 29.64, 29.60, 29.47, 29.39, 29.10, 26.56, 22.76, 14.21; IR (KBr): ν 2951, 2916, 2848, 1558, 1465, 1217, 783 cm<sup>-1</sup>; HRMS (ESI) calcd for [C<sub>17</sub>H<sub>27</sub>N<sub>3</sub>NaS]<sup>+</sup> ([M+Na]<sup>+</sup>): 328.1818, found: 328.1818.

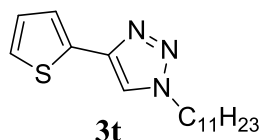

Following the general procedure for Scheme 2, **3t** was obtained as an off-white solid (109 mg, 71% yield); mp. 67 – 68 °C; <sup>1</sup>H NMR (400 MHz, CDCl<sub>3</sub>) δ 7.65 (s, 1H), 7.36 (dd, *J* = 3.6, 1.1 Hz, 1H), 7.27 (dd, *J* = 5.0, 1.1 Hz, 1H), 7.06 (dd, *J* = 5.1, 3.6 Hz, 1H), 4.35 (t, *J* = 7.3 Hz, 2H), 1.92 (t, *J* = 7.2 Hz, 2H), 1.32 – 1.24 (m, 16H), 0.87 (t, *J* = 6.7 Hz, 3H); <sup>13</sup>C NMR (100 MHz, CDCl<sub>3</sub>) δ 142.86, 133.22, 127.67, 124.98, 124.08, 119.04, 50.57, 31.97, 30.40, 29.64, 29.60, 29.47, 29.39, 29.09, 26.56, 22.76, 14.20; IR (KBr): ν 2952, 2917, 2847, 1558, 1465, 1219, 686 cm<sup>-1</sup>; HRMS (ESI) calcd for [C<sub>17</sub>H<sub>27</sub>N<sub>3</sub>NaS]<sup>+</sup> ([M+Na]<sup>+</sup>): 328.1818, found: 328.1818.

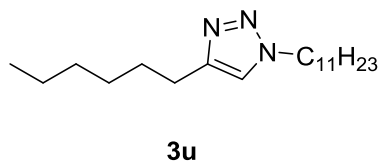

Following the general procedure for Scheme 2, **3u** was obtained as a dull white solid (127.5 mg, 83% yield); mp. = 56–57 °C; <sup>1</sup>H NMR (600 MHz, CDCl<sub>3</sub>) δ 7.22 (s, 1H), 4.31 – 4.20 (m, 2H), 2.65 (t, *J* = 7.5 Hz, 2H), 1.82 (t, *J* = 7.8 Hz, 2H), 1.61 (p, *J* = 8.0 Hz, 2H), 1.30 – 1.17 (m, 22H), 0.85 – 0.80 (m, 6H); <sup>13</sup>C NMR (150 MHz, CDCl<sub>3</sub>) δ 148.38, 120.40, 50.17, 31.91, 31.62, 30.39, 29.58, 29.54, 29.50, 29.42, 29.33, 29.04, 28.96, 26.53, 25.74, 22.70, 22.59, 14.12, 14.08; IR (KBr): ν 2953, 2916, 2848, 1636, 1468, 1212, 1154, 1061 cm<sup>-1</sup>; HRMS (ESI) calcd for [C<sub>19</sub>H<sub>37</sub>N<sub>3</sub>Na]<sup>+</sup> ([M+Na]<sup>+</sup>): 330.2880, found: 330.2880.

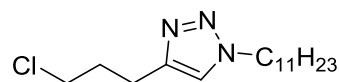

**3v**

Following the general procedure for Scheme 2, **3v** was obtained as an off-White solid (102 mg, 68% yield); mp. = 48–49 °C. <sup>1</sup>H NMR (600 MHz, CDCl<sub>3</sub>) δ 7.30 (s, 1H), 4.54 – 3.92 (m, 2H), 3.55 (t, *J* = 6.4 Hz, 2H), 3.04 – 2.70 (m, 2H), 2.30 – 2.01 (m, 2H), 1.91 – 1.75 (m, 2H), 1.46 – 1.15 (m, 16H), 0.85 (t, *J* = 7.1 Hz, 3H); <sup>13</sup>C NMR (150 MHz, CDCl<sub>3</sub>) δ 146.30, 121.02, 50.31, 44.29, 31.96, 31.95, 30.40, 29.62, 29.57, 29.45, 29.37, 29.06, 26.57, 22.74, 22.72, 14.19; IR (KBr): ν 2952, 2916, 2847, 1646, 1489, 1305, 1212 842 cm<sup>-1</sup>; HRMS (ESI) calcd for [C<sub>16</sub>H<sub>30</sub>ClN<sub>3</sub>Na]<sup>+</sup> ([M+Na]<sup>+</sup>): 322.2020, found: 322.2020.

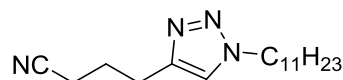

**3w**

Following the general procedure for Scheme 2, **3w** was obtained as an off-White solid (118 mg, 81% yield), mp. = 60–61 °C; <sup>1</sup>H NMR (600 MHz, CDCl<sub>3</sub>) δ 7.31 (s, 1H), 4.27 (t, *J* = 7.3 Hz, 2H), 2.82 (t, *J* = 7.5 Hz, 2H), 2.38 (t, *J* = 7.1 Hz, 2H), 2.03 (t, *J* = 7.2 Hz, 2H), 1.84 (t, *J* = 7.9 Hz, 2H), 1.28 – 1.17 (m, 16H), 0.82 (t, *J* = 8.5 Hz, 3H); <sup>13</sup>C NMR (150 MHz, CDCl<sub>3</sub>) δ 145.44, 121.14, 119.42, 50.29, 31.87, 30.31, 29.54, 29.50, 29.37, 29.29, 28.98, 26.49, 24.92, 24.20, 22.66, 16.47, 14.11; IR (KBr): ν 2953, 2919, 2847, 2246, 1636, 1463, 1372, 1210 cm<sup>-1</sup>; HRMS (ESI) calcd for [C<sub>17</sub>H<sub>30</sub>N<sub>4</sub>Na]<sup>+</sup> ([M+Na]<sup>+</sup>): 313.2363, found: 313.2363.

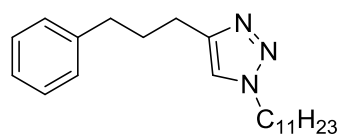

**3x**

Following the general procedure for Scheme 2, **3x** was obtained as a yellowish solid (133 mg, 78% yield); mp. = 40–41 °C; <sup>1</sup>H NMR (600 MHz, CDCl<sub>3</sub>) δ 7.30 – 7.25 (m, 3H), 7.23 – 7.17 (m, 3H), 4.30 (td, *J* = 7.5, 1.4 Hz, 2H), 2.76 (t, *J* = 7.9 Hz, 2H), 2.69 (t, *J* = 8.1 Hz, 2H), 2.05 – 2.00 (m, 2H), 1.88 (t, *J* = 7.2 Hz, 2H), 1.37 – 1.21 (m, 16H), 0.89 (t, *J* = 7.6 Hz, 3H); <sup>13</sup>C NMR (150 MHz, CDCl<sub>3</sub>) δ 141.93, 128.48, 128.33, 125.82, 120.51, 50.17, 35.40, 31.89, 31.13, 30.35, 29.56, 29.52, 29.40, 29.31, 29.02, 26.51, 25.22, 22.68, 14.13; IR (KBr): ν 2953, 2917, 2847, 1646, 1461, 1211, 1146, 1056 cm<sup>-1</sup>; HRMS (ESI) calcd for [C<sub>22</sub>H<sub>35</sub>N<sub>3</sub>Na]<sup>+</sup> ([M+Na]<sup>+</sup>): 364.2723, found: 364.2723.

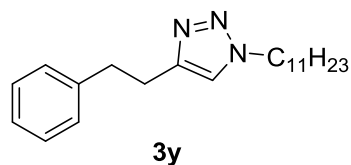

Following the general procedure for Scheme 2, **3y** was obtained as an off-White solid (136 mg, 83% yield); mp. = 55–56 °C;  $^1\text{H}$  NMR (600 MHz,  $\text{CDCl}_3$ )  $\delta$  7.24 (t,  $J$  = 7.4 Hz, 2H), 7.16 (dd,  $J$  = 13.0, 7.7 Hz, 3H), 7.06 (s, 1H), 4.23 (t,  $J$  = 7.2 Hz, 2H), 3.09 – 2.88 (m, 2H), 1.81– 1.79 (m, 2H), 1.31 – 1.08 (m, 16H), 0.86 (t,  $J$  = 7.1 Hz, 3H);  $^{13}\text{C}$  NMR (150 MHz,  $\text{CDCl}_3$ )  $\delta$  147.14, 141.26, 128.53, 128.38, 126.09, 120.82, 50.17, 35.66, 31.92, 30.36, 29.60, 29.56, 29.42, 29.34, 29.04, 27.57, 26.47, 22.71, 14.16; IR (KBr):  $\nu$  2952, 2917, 2847, 1636, 1463, 1211, 1152, 1059  $\text{cm}^{-1}$ ; HRMS (ESI) calcd for  $[\text{C}_{21}\text{H}_{33}\text{N}_3\text{Na}]^+$  ( $[\text{M}+\text{Na}]^+$ ): 350.2567, found: 350.2567.

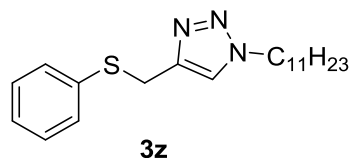

Following the general procedure for Scheme 2, **3z** was obtained as an off-White solid (138 mg, 80% yield); mp. = 76–77 °C;  $^1\text{H}$  NMR (600 MHz,  $\text{CDCl}_3$ )  $\delta$  7.31 (d,  $J$  = 8.3 Hz, 2H), 7.28 (s, 1H), 7.24 (t,  $J$  = 7.7 Hz, 2H), 7.16 (t,  $J$  = 8.2 Hz, 1H), 4.27 – 4.19 (m, 4H), 1.80 (t,  $J$  = 7.4 Hz, 2H), 1.29 – 1.19 (m, 16H), 0.86 (t,  $J$  = 7.74 Hz, 3H);  $^{13}\text{C}$  NMR (150 MHz,  $\text{CDCl}_3$ )  $\delta$  144.86, 135.62, 129.55, 129.00, 126.47, 121.90, 50.39, 31.94, 30.28, 29.61, 29.56, 29.42, 29.35, 29.02, 28.93, 26.44, 22.73, 14.18; IR (KBr):  $\nu$  2952, 2917, 2847, 1635, 1464, 1437, 1240, 1060  $\text{cm}^{-1}$ ; HRMS (ESI) calcd for  $[\text{C}_{20}\text{H}_{31}\text{N}_3\text{SNa}]^+$  ( $[\text{M}+\text{Na}]^+$ ): 368.2131, found: 368.2131.

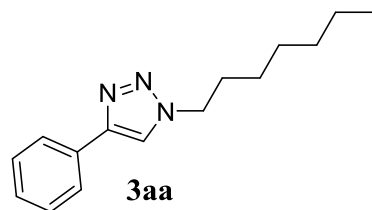

Following the general procedure for Scheme 3, **3aa** was obtained as a white solid (89 mg, 73% yield); mp. 63 –64 °C;  $^1\text{H}$  NMR (400 MHz,  $\text{CDCl}_3$ )  $\delta$  7.83 (dd,  $J$  = 7.2, 1.7 Hz, 2H), 7.74 (s, 1H), 7.42 (t,  $J$  = 7.6 Hz, 2H), 7.36 – 7.27 (m, 1H), 4.38 (t,  $J$  = 7.3 Hz, 2H), 1.94 (dd,  $J$  = 8.8, 5.7 Hz, 2H), 1.34 – 1.26 (m, 8H), 0.87 (t,  $J$  = 7.1 Hz, 3H);  $^{13}\text{C}$  NMR (100 MHz,  $\text{CDCl}_3$ )  $\delta$  147.82, 130.86, 128.93, 128.18, 125.80, 119.51, 50.55, 31.68, 30.47, 28.79, 26.57, 22.63, 14.13; IR (KBr):  $\nu$  2952, 2925, 2852, 1616, 1464, 1216, 1078  $\text{cm}^{-1}$ ; HRMS (ESI) calcd for  $[\text{C}_{15}\text{H}_{21}\text{N}_3\text{Na}]^+$  ( $[\text{M}+\text{Na}]^+$ ): 266.1628, found: 266.1629.

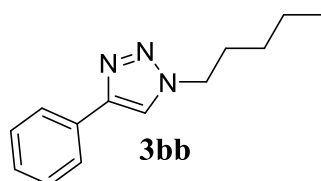

Following the general procedure for Scheme 3, **3bb** was obtained as a yellowish solid (78 mg, 72% yield); mp. 64 – 65 °C;  $^1\text{H}$  NMR (400 MHz,  $\text{CDCl}_3$ )  $\delta$  7.87 – 7.80 (m, 2H), 7.74 (s, 1H), 7.46 – 7.39 (m, 2H), 7.35 – 7.29 (m, 1H), 4.39 (t,  $J$  = 7.3 Hz, 2H), 1.99 – 1.91 (m, 2H), 1.39 – 1.30 (m, 4H), 0.91 (t,  $J$  = 6.9 Hz, 3H);  $^{13}\text{C}$  NMR (100 MHz,  $\text{CDCl}_3$ )  $\delta$  147.86, 130.86, 128.96, 128.21, 125.82, 119.51, 50.56, 30.18, 28.74, 22.24, 13.98; IR (KBr):  $\nu$  2951, 2922, 2855, 1646, 1464, 1216, 1077  $\text{cm}^{-1}$ ; HRMS (ESI) calcd for  $[\text{C}_{13}\text{H}_{17}\text{N}_3\text{Na}]^+$  ( $[\text{M}+\text{Na}]^+$ ): 238.1315, found: 238.1318.

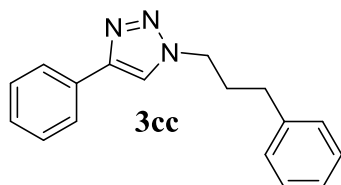

Following the general procedure for Scheme 3, **3cc** was obtained as a light yellow solid (118 mg, 90% yield); mp. 70 – 71 °C;  $^1\text{H}$  NMR (400 MHz,  $\text{CDCl}_3$ )  $\delta$  7.87 – 7.80 (m, 2H), 7.72 (s, 1H), 7.48 – 7.39 (m, 2H), 7.39 – 7.27 (m, 3H), 7.25 – 7.15 (m, 3H), 4.40 (t,  $J$  = 7.1 Hz, 2H), 2.69 (t,  $J$  = 7.5 Hz, 2H), 2.36 – 2.24 (m, 2H);  $^{13}\text{C}$  NMR (100 MHz,  $\text{CDCl}_3$ )  $\delta$  147.87, 140.25, 130.77, 128.95, 128.74, 128.57, 128.24, 126.49, 125.80, 119.65, 49.68, 32.62, 31.78; IR (KBr):  $\nu$  3027, 2922, 2851, 1684, 1456, 1224, 1077  $\text{cm}^{-1}$ ; HRMS (ESI) calcd for  $[\text{C}_{17}\text{H}_{17}\text{N}_3\text{Na}]^+$  ( $[\text{M}+\text{Na}]^+$ ): 286.1315, found: 286.1307.

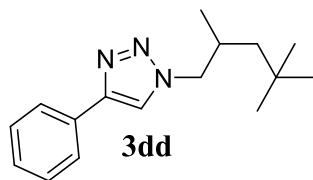

Following the general procedure for Scheme 3, **3dd** was obtained as a bright white solid (89 mg, 69% yield); mp. 99 – 100 °C;  $^1\text{H}$  NMR (400 MHz,  $\text{CDCl}_3$ )  $\delta$  7.84 (dd,  $J$  = 8.3, 1.3 Hz, 2H), 7.73 (s, 1H), 7.45 – 7.39 (m, 2H), 7.35 – 7.30 (m, 1H), 4.27 (dd,  $J$  = 13.5, 6.6 Hz, 1H), 4.12 (dd,  $J$  = 13.5, 8.0 Hz, 1H), 2.21 – 2.11 (m, 1H), 1.32 (dd,  $J$  = 14.1, 3.5 Hz, 1H), 1.16 (dd,  $J$  = 14.1, 6.5 Hz, 1H), 0.97 (d,  $J$  = 6.7 Hz, 3H), 0.89 (s, 9H);  $^{13}\text{C}$

NMR (100 MHz, CDCl<sub>3</sub>)  $\delta$  147.71, 130.86, 128.95, 128.20, 125.83, 120.02, 57.84, 47.87, 31.28, 31.08, 29.89, 20.45; IR (KBr):  $\nu$  3087, 2955, 1647, 1464, 1226, 1082 cm<sup>-1</sup>; HRMS (ESI) calcd for [C<sub>16</sub>H<sub>23</sub>N<sub>3</sub>Na]<sup>+</sup> ([M+Na]<sup>+</sup>): 280.1784, found: 280.1784.

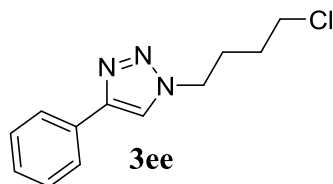

Following the general procedure for Scheme 3, **3ee** was obtained as a white solid (86 mg, 73% yield); mp. 51 – 52 °C; <sup>1</sup>H NMR (400 MHz, CDCl<sub>3</sub>)  $\delta$  7.83 – 7.79 (m, 2H), 7.77 (s, 1H), 7.40 (td,  $J$  = 8.5, 7.8, 2.0 Hz, 2H), 7.34 – 7.29 (m, 1H), 4.41 (t,  $J$  = 7.0 Hz, 2H), 3.54 (t,  $J$  = 6.3 Hz, 2H), 2.10 (dt,  $J$  = 14.8, 7.0 Hz, 2H), 1.83 – 1.76 (m, 2H); <sup>13</sup>C NMR (100 MHz, CDCl<sub>3</sub>)  $\delta$  147.90, 130.58, 128.90, 128.22, 125.71, 119.61, 49.55, 44.08, 29.22, 27.59; IR (KBr):  $\nu$  2956, 2922, 2850, 1652, 1223, 1077, 746 cm<sup>-1</sup>; HRMS (ESI) calcd for [C<sub>12</sub>H<sub>14</sub>ClN<sub>3</sub>Na]<sup>+</sup> ([M+Na]<sup>+</sup>): 258.0768, found: 258.0769.

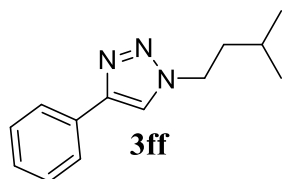

Following the general procedure for Scheme 3, **3ff** was obtained as an off-white solid (84 mg, 78% yield); mp. 77.7 – 78.7 °C; <sup>1</sup>H NMR (400 MHz, CDCl<sub>3</sub>)  $\delta$  7.85 – 7.81 (m, 2H), 7.75 (s, 1H), 7.41 (t,  $J$  = 7.5 Hz, 2H), 7.34 – 7.30 (m, 1H), 4.43 – 4.38 (m, 2H), 1.84 (dt,  $J$  = 8.6, 7.1 Hz, 2H), 1.62 (dt,  $J$  = 13.4, 6.7 Hz, 1H), 0.98 (d,  $J$  = 6.7 Hz, 6H); <sup>13</sup>C NMR (100 MHz, CDCl<sub>3</sub>)  $\delta$  147.83, 130.83, 128.91, 128.15, 125.77, 119.45, 48.84, 39.17, 25.61, 22.30; IR (KBr):  $\nu$  3082, 2956, 1733, 1558, 1447, 1222, 1078 cm<sup>-1</sup>; HRMS (ESI) calcd for [C<sub>13</sub>H<sub>17</sub>N<sub>3</sub>Na]<sup>+</sup> ([M+Na]<sup>+</sup>): 238.1315, found: 238.1316.

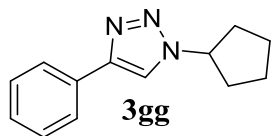

Following the general procedure for Scheme 3, **3gg** was obtained as a yellow solid (93 mg, 87% yield); mp. 68 – 69 °C; <sup>1</sup>H NMR (400 MHz, CDCl<sub>3</sub>)  $\delta$  7.83 – 7.80 (m, 2H), 7.75 (s, 1H), 7.42 – 7.38 (m, 2H), 7.33 – 7.28 (m, 1H), 4.95 (tt,  $J$  = 7.6, 6.2 Hz, 1H), 2.31 – 2.23 (m, 2H), 2.12 – 2.04 (m, 2H), 1.94 – 1.88 (m, 2H), 1.82 – 1.73



(m, 2H);  $^{13}\text{C}$  NMR (100 MHz,  $\text{CDCl}_3$ )  $\delta$  147.53, 130.87, 128.80, 128.00, 125.66, 118.09, 61.91, 33.44, 24.11; IR (KBr):  $\nu$  3096, 2955, 2872, 1652, 1455, 1224, 1080  $\text{cm}^{-1}$ ; HRMS (ESI) calcd for  $[\text{C}_{13}\text{H}_{15}\text{N}_3\text{Na}]^+$  ( $[\text{M}+\text{Na}]^+$ ): 236.1158, found: 236.1158.

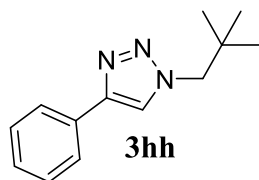

Following the general procedure for Scheme 3, **3hh** was obtained as a white solid (83 mg, 77% yield); mp. 108 – 109  $^{\circ}\text{C}$ ;  $^1\text{H}$  NMR (400 MHz,  $\text{CDCl}_3$ )  $\delta$  7.88 – 7.81 (m, 2H), 7.71 (s, 1H), 7.46 – 7.39 (m, 2H), 7.33 (d,  $J$  = 7.4 Hz, 1H), 4.18 (s, 2H), 1.02 (s, 9H);  $^{13}\text{C}$  NMR (100 MHz,  $\text{CDCl}_3$ )  $\delta$  147.31, 130.81, 128.93, 128.16, 125.80, 120.87, 61.94, 32.76, 27.62; IR (KBr):  $\nu$  2933, 2856, 1655, 1541, 1463, 1226, 1079  $\text{cm}^{-1}$ ; HRMS (ESI) calcd for  $[\text{C}_{13}\text{H}_{17}\text{N}_3\text{Na}]^+$  ( $[\text{M}+\text{Na}]^+$ ): 238.1315, found: 238.1316.

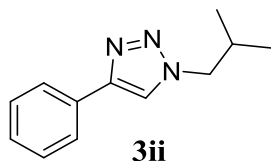

Following the general procedure for Scheme 3, **3ii** was obtained as a light yellow solid (93 mg, 92% yield); mp. 62 – 63  $^{\circ}\text{C}$ ;  $^1\text{H}$  NMR (400 MHz,  $\text{CDCl}_3$ )  $\delta$  7.88 – 7.81 (m, 2H), 7.73 (s, 1H), 7.45 – 7.39 (m, 2H), 7.35 – 7.29 (m, 1H), 4.20 (d,  $J$  = 7.2 Hz, 2H), 2.26 (dt,  $J$  = 13.7, 6.9 Hz, 1H), 0.97 (d,  $J$  = 6.7 Hz, 6H);  $^{13}\text{C}$  NMR (100 MHz,  $\text{CDCl}_3$ )  $\delta$  147.68, 130.81, 128.92, 128.17, 125.77, 120.00, 57.73, 29.84, 19.95; IR (KBr):  $\nu$  2960, 2928, 2872, 1652, 1465, 1224, 1070  $\text{cm}^{-1}$ ; HRMS (ESI) calcd for  $[\text{C}_{12}\text{H}_{15}\text{N}_3\text{Na}]^+$  ( $[\text{M}+\text{Na}]^+$ ): 224.1158, found: 224.1160.

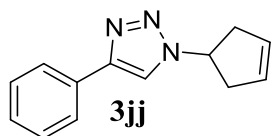

Following the general procedure for Scheme 3, **3jj** was obtained as a brown semi solid (26 mg, 60% yield);  $^1\text{H}$  NMR (400 MHz,  $\text{CDCl}_3$ )  $\delta$  7.84 – 7.80 (m, 2H), 7.74 (s, 1H), 7.43 – 7.38 (m, 2H), 7.34 – 7.29 (m, 1H), 5.88 (s, 2H), 5.42 (tt,  $J$  = 8.3, 3.6 Hz, 1H), 3.12 – 3.04 (m, 2H), 2.74 (dd,  $J$  = 15.7, 3.4 Hz, 2H);  $^{13}\text{C}$  NMR (100 MHz,  $\text{CDCl}_3$ )  $\delta$  148.18, 130.86, 128.91, 128.87, 128.18, 125.78, 117.17, 59.32, 40.77; IR (KBr):  $\nu$  3061, 2929,

2854, 1653, 1451, 1226, 1077  $\text{cm}^{-1}$ ; HRMS (ESI) calcd for  $[\text{C}_{13}\text{H}_{13}\text{N}_3\text{Na}]^+$  ( $[\text{M}+\text{Na}]^+$ ): 234.1002, found: 234.1001.

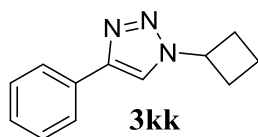

Following the general procedure for Scheme 3, **3kk** was obtained as a light white solid (95 mg, 95% yield); mp. 74 – 75  $^{\circ}\text{C}$ ;  $^1\text{H}$  NMR (400 MHz,  $\text{CDCl}_3$ )  $\delta$  7.84 – 7.79 (m, 3H), 7.39 (dd,  $J = 8.5, 6.8$  Hz, 2H), 7.32 – 7.27 (m, 1H), 5.09 – 4.98 (m, 1H), 2.63 – 2.53 (m, 4H), 1.98 – 1.85 (m, 2H);  $^{13}\text{C}$  NMR (100 MHz,  $\text{CDCl}_3$ )  $\delta$  147.53, 130.80, 128.80, 128.02, 125.68, 118.12, 54.11, 30.76, 15.02; IR (KBr):  $\nu$  2996, 2871, 1647, 1569, 1456, 1220, 1072  $\text{cm}^{-1}$ ; HRMS (ESI) calcd for  $[\text{C}_{12}\text{H}_{13}\text{N}_3\text{Na}]^+$  ( $[\text{M}+\text{Na}]^+$ ): 222.1002, found: 222.1001.

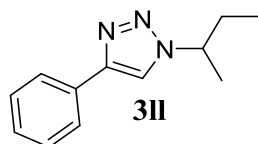

Following the general procedure for Scheme 3, **3ll** was obtained as a bright white solid (89 mg, 94% yield); mp. 54 – 55  $^{\circ}\text{C}$ ;  $^1\text{H}$  NMR (400 MHz,  $\text{CDCl}_3$ )  $\delta$  7.85 – 7.81 (m, 2H), 7.75 (s, 1H), 7.43 – 7.37 (m, 2H), 7.33 – 7.28 (m, 1H), 4.66 – 4.56 (m, 1H), 2.00 – 1.85 (m, 2H), 1.58 (d,  $J = 6.8$  Hz, 3H), 0.87 (t,  $J = 7.4$  Hz, 3H);  $^{13}\text{C}$  NMR (100 MHz,  $\text{CDCl}_3$ )  $\delta$  147.54, 130.93, 128.86, 128.06, 125.70, 117.53, 59.01, 30.38, 21.04, 10.51; IR (KBr):  $\nu$  2930, 2854, 1653, 1533, 1452, 1226, 1077  $\text{cm}^{-1}$ ; HRMS (ESI) calcd for  $[\text{C}_{12}\text{H}_{15}\text{N}_3\text{Na}]^+$  ( $[\text{M}+\text{Na}]^+$ ): 224.1158, found: 224.1159.

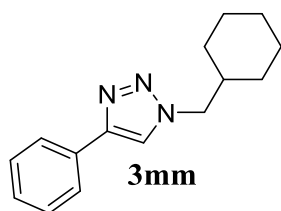

Following the general procedure for Scheme 3, **3mm** was obtained as a pale yellow solid (115 mg, 95% yield); mp. 95 – 96  $^{\circ}\text{C}$ ;  $^1\text{H}$  NMR (400 MHz,  $\text{CDCl}_3$ )  $\delta$  7.86 – 7.79 (m, 2H), 7.71 (s, 1H), 7.44 – 7.36 (m, 2H), 7.34 – 7.28 (m, 1H), 4.20 (d,  $J = 7.2$  Hz, 2H), 1.91 – 1.88 (m, 1H), 1.74 – 1.63 (m, 4H), 1.33 – 1.08 (m, 4H), 1.06 – 0.95 (m, 2H);  $^{13}\text{C}$  NMR (100 MHz,  $\text{CDCl}_3$ )  $\delta$  147.60, 130.81, 128.89, 128.12, 125.74, 120.14, 56.62, 38.88, 30.57, 26.14, 25.59; IR (KBr):  $\nu$  2922, 2849, 1507, 1457, 1221, 1085  $\text{cm}^{-1}$ ; HRMS (ESI) calcd for  $[\text{C}_{15}\text{H}_{19}\text{N}_3\text{Na}]^+$  ( $[\text{M}+\text{Na}]^+$ ): 264.1471, found: 264.1471.

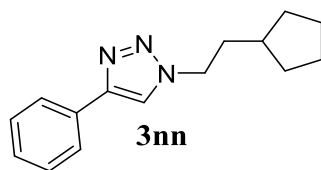

Following the general procedure for Scheme 3, **3nn** was obtained as a dull white solid (78 mg, 64% yield); mp. 98 – 99 °C;  $^1\text{H}$  NMR (400 MHz,  $\text{CDCl}_3$ )  $\delta$  7.88 – 7.79 (m, 2H), 7.74 (s, 1H), 7.41 (dd,  $J$  = 8.3, 6.8 Hz, 2H), 7.35 – 7.29 (m, 1H), 4.39 (t,  $J$  = 7.3, Hz, 2H), 1.96 (dt,  $J$  = 8.6, 7.0 Hz, 2H), 1.87 – 1.47 (m, 8H), 1.15 (ddt,  $J$  = 8.4, 4.9, 2.0 Hz, 1H);  $^{13}\text{C}$  NMR (100 MHz,  $\text{CDCl}_3$ )  $\delta$  147.81, 130.84, 128.92, 128.17, 125.79, 119.48, 49.97, 37.30, 36.69, 32.48, 25.16; IR (KBr):  $\nu$  2949, 2871, 1647, 1457, 1220, 1086  $\text{cm}^{-1}$ ; HRMS (ESI) calcd for  $[\text{C}_{15}\text{H}_{19}\text{N}_3\text{Na}]^+$  ( $[\text{M}+\text{Na}]^+$ ): 264.1471, found: 264.1472.

# Preliminary mechanistic studies

## (a) With TEMPO

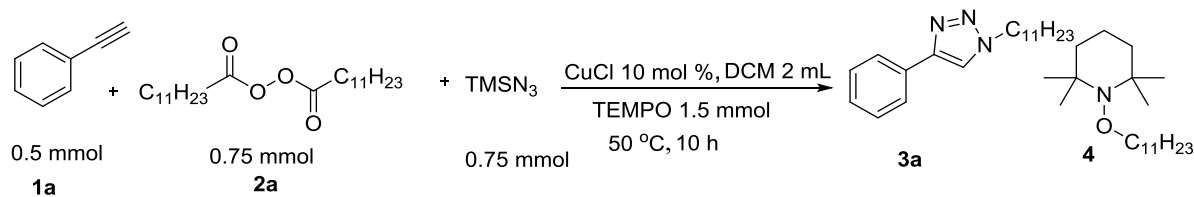

Phenyl acetylene (**1a**, 52.6 mg, 0.5 mmol), LPO (398.96 mg, 0.75 mmol),  $\text{CuCl}$  (4.9 mg, 0.05 mmol), TEMPO (1.5 mmol),  $\text{TMSN}_3$  (90.4 mg, 0.75 mmol), and  $\text{CH}_2\text{Cl}_2$  (2 mL) were added into a flame-dried Schlenk tube with a stirring bar and stirred at  $50\text{ }^\circ\text{C}$  for 10 hours. Then, the reaction mixture was cooled to ambient temperature, poured into saturated sodium bicarbonate solution (25 mL) and extracted with  $\text{CH}_2\text{Cl}_2$  ( $3 \times 25$  mL) and passed through a short pad of celite. The filtrate was analyzed by GC–MS. No product (**3a**) was observed, only compound **4** was detected by GC–MS.

## (b) Ring opening experiment

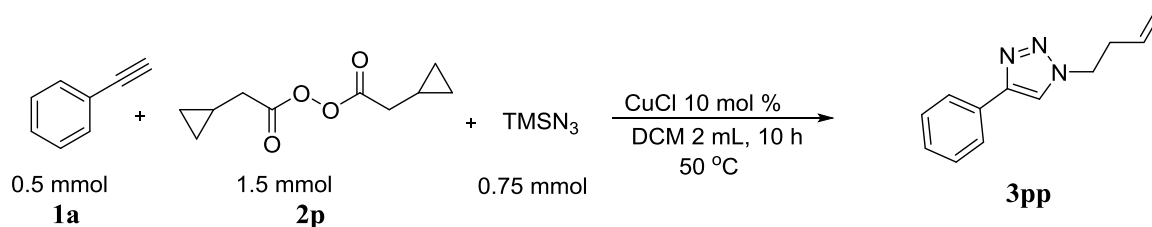

$\text{CuCl}$  (4.9 mg, 10 mol %),  $\text{TMSN}_3$  (90.4 mg, 0.75 mmol), phenylacetylene (**1a**, 52.6 mg, 0.5 mmol), diacyl peroxide **2p** (1.5 mmol) and  $\text{CH}_2\text{Cl}_2$  (2 mL) were added to a flame-dried Schlenk tube with a stirring bar. The reaction mixture was heated to  $50\text{ }^\circ\text{C}$  for 10 hours, then cooled to room temperature. The solvent was removed by rotary evaporation, and the residue was chromatographed on silica gel which afforded the ring-opening product **3pp** in 88% yield.

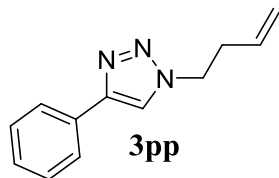

Compound **3pp** was obtained as a light brown solid (94 mg, 88% yield); mp. 53 – 54 °C;  $^1\text{H}$  NMR (400 MHz,  $\text{CDCl}_3$ )  $\delta$  7.84 – 7.79 (m, 2H), 7.75 (s, 1H), 7.43 – 7.37 (m, 2H), 7.34 – 7.29 (m, 1H), 5.87 – 5.68 (m, 1H), 5.12 (dt,  $J = 2.3, 1.4$  Hz, 1H), 5.10 – 5.03 (m, 1H), 4.44 (t,  $J = 7.1$  Hz, 2H), 2.71 – 2.65 (m, 2H);  $^{13}\text{C}$  NMR (100 MHz,  $\text{CDCl}_3$ )  $\delta$  147.71, 133.23, 130.75, 128.90, 128.16, 125.75, 119.74, 118.58, 49.80, 34.51; IR (KBr):  $\nu$  3096, 2927, 2854, 1646, 1450, 1225, 1080  $\text{cm}^{-1}$ ; HRMS (ESI) calcd for  $[\text{C}_{12}\text{H}_{13}\text{N}_3\text{Na}]^+$  ( $[\text{M}+\text{Na}]^+$ ): 222.1002, found: 222.1000.

# References

1. Li, Y.; Han, Y.; Xiong, H.; Zhu, N.; Qian, B.; Ye, C.; Kantchev, E. A. B.; Bao, H. *Org. Lett.*, **2016**, *18*, 392.
2. Sheldon, R. A.; Kochi, J. K. *J. Am. Chem. Soc.*, **1970**, *92*, 4395.

# Copies of $^1\text{H}$ , $^{13}\text{C}$ , and $^{19}\text{F}$ NMR spectra

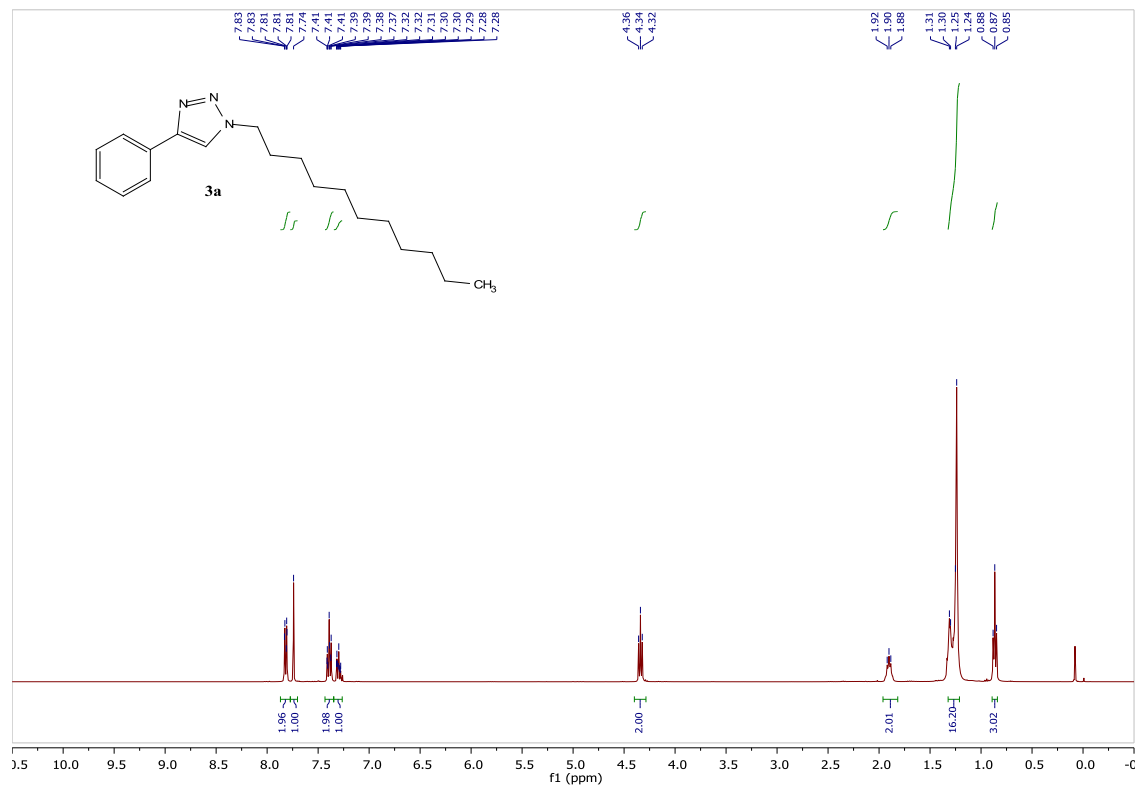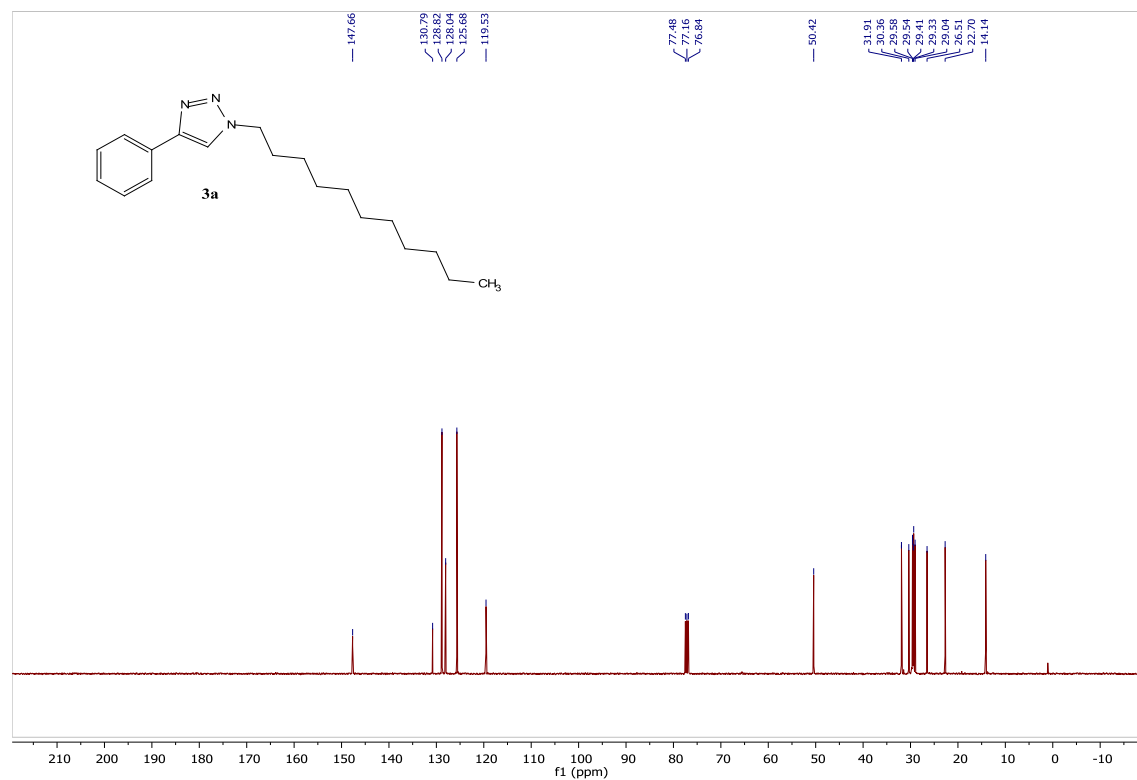

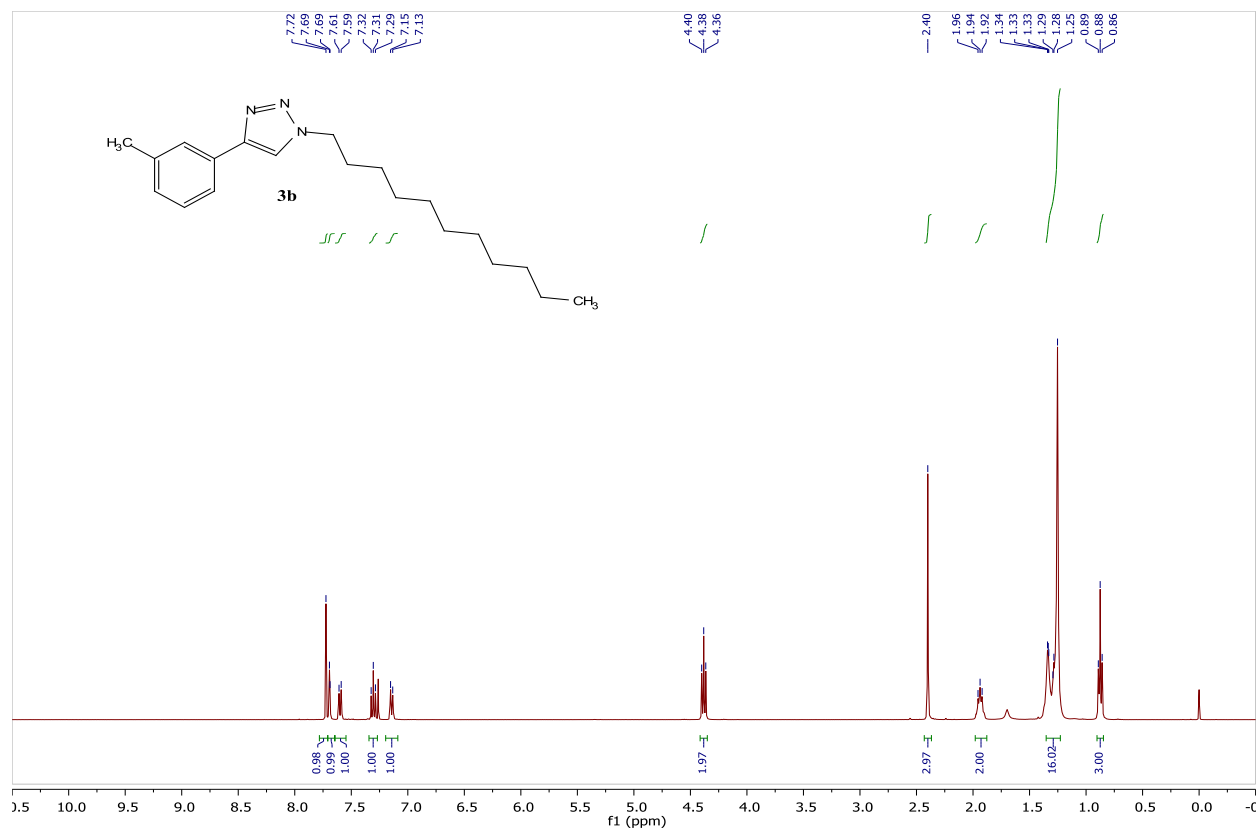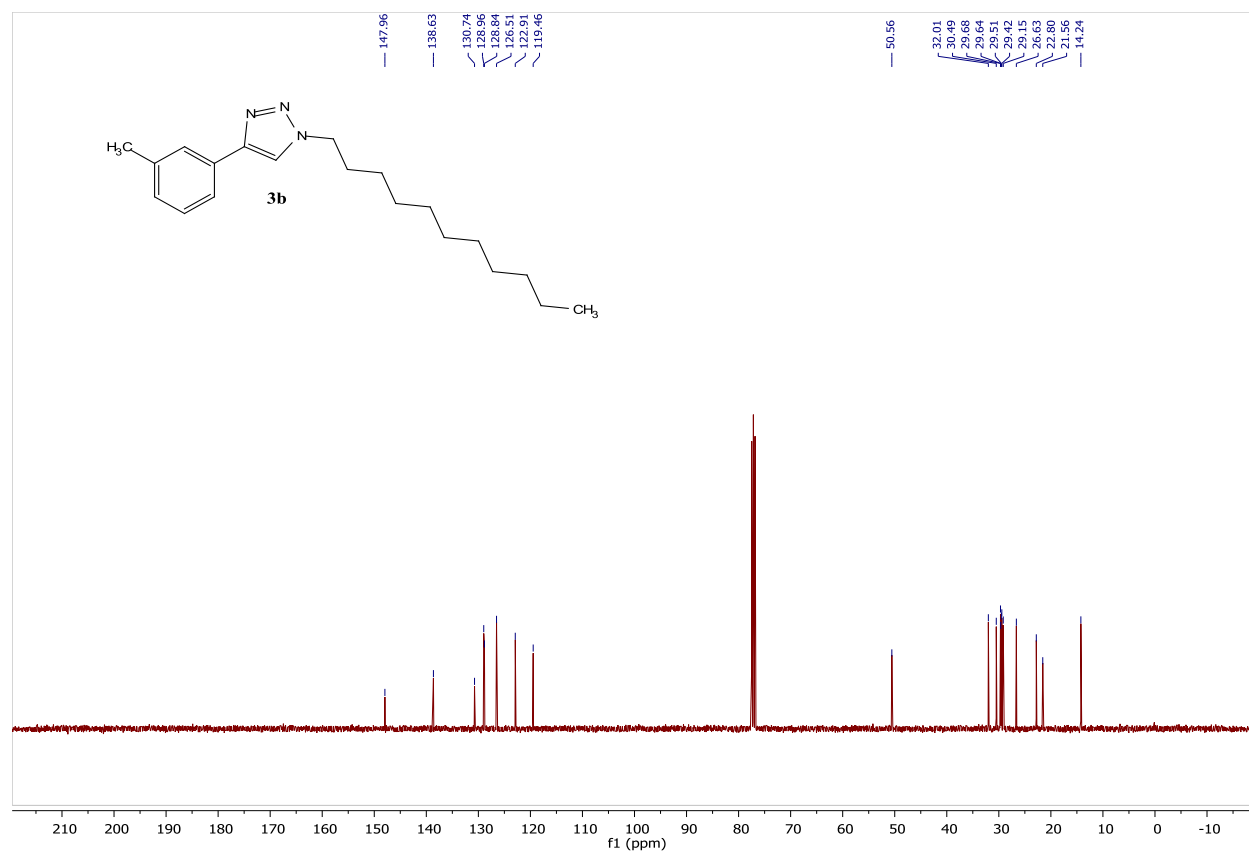



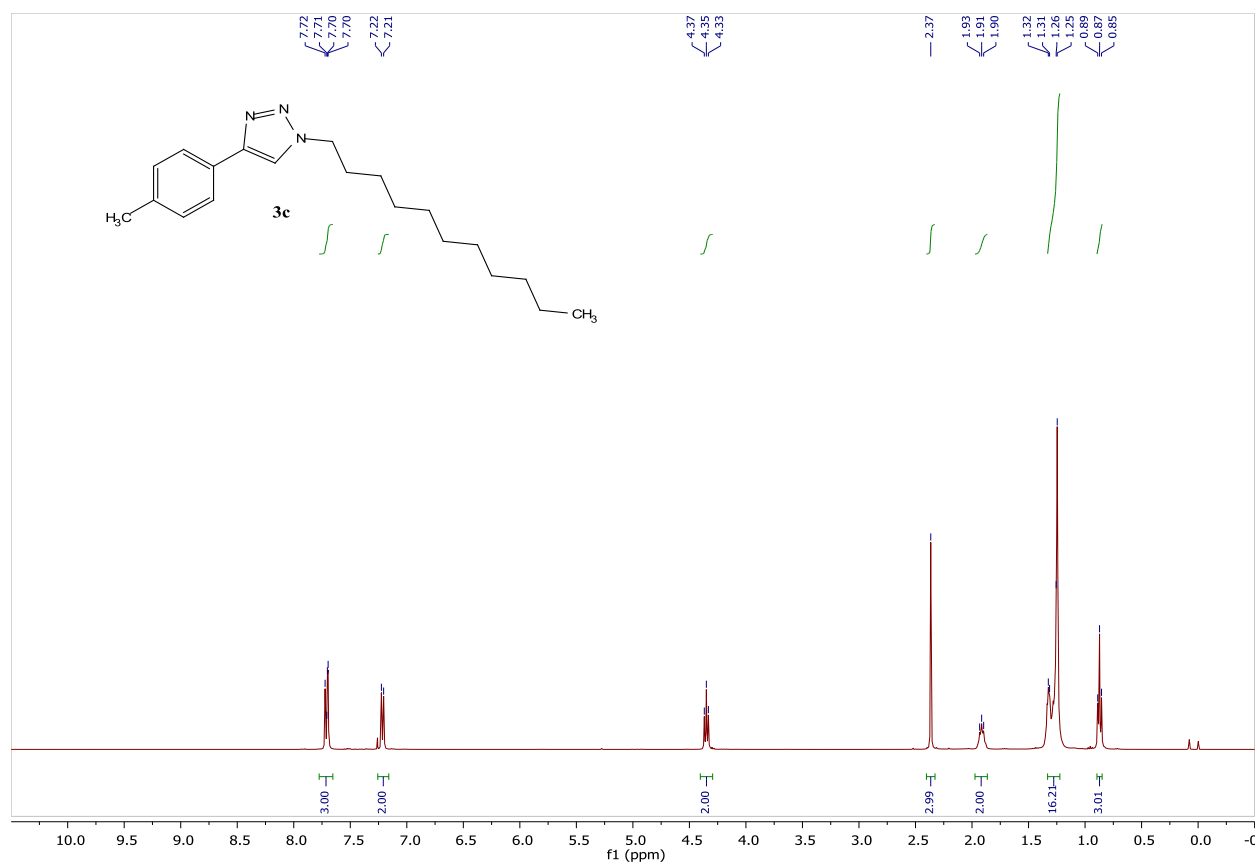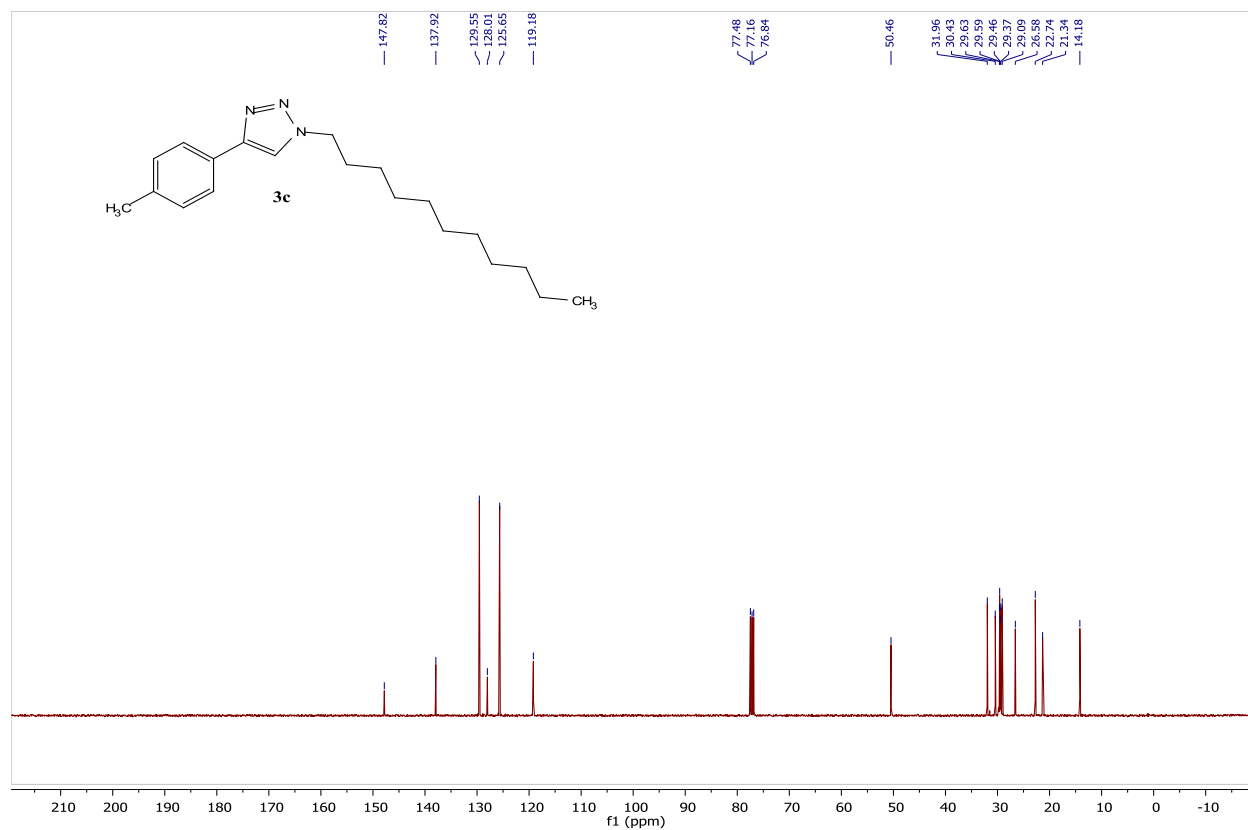

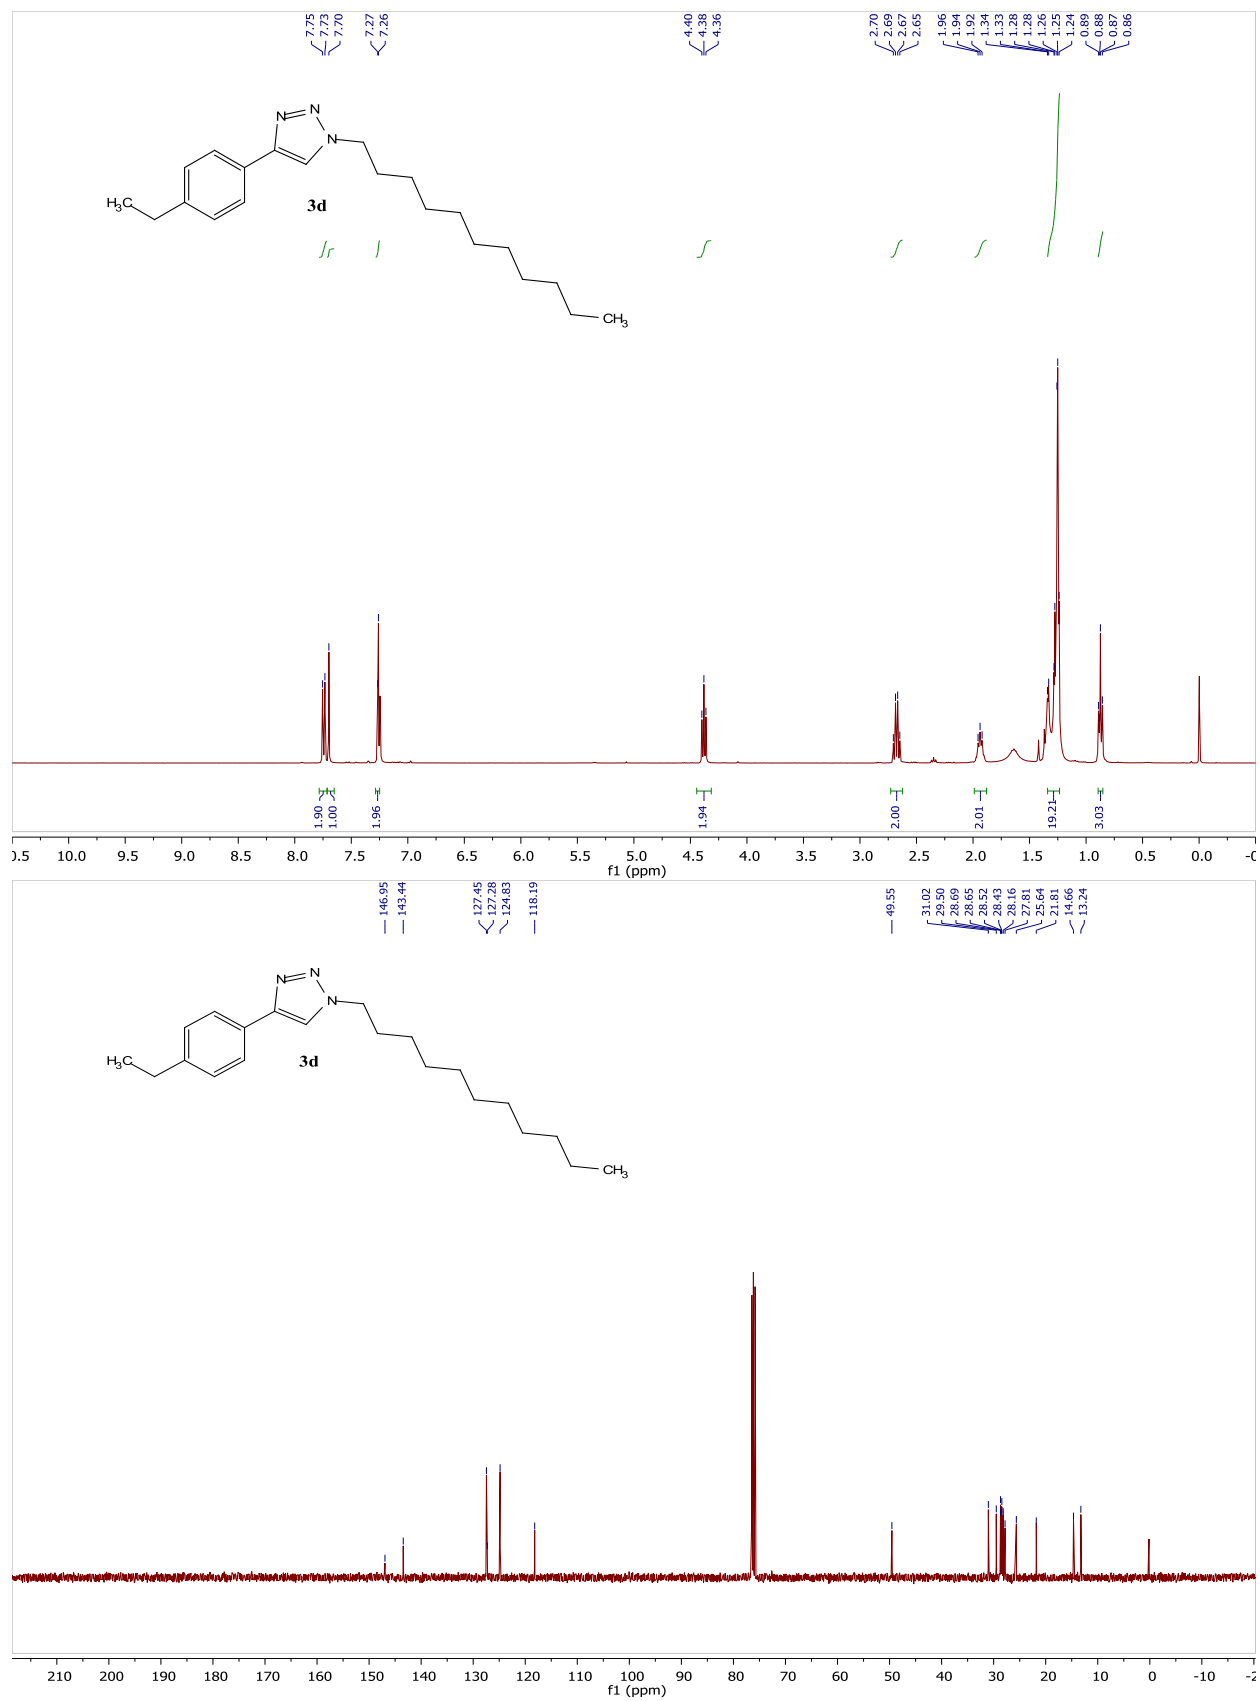

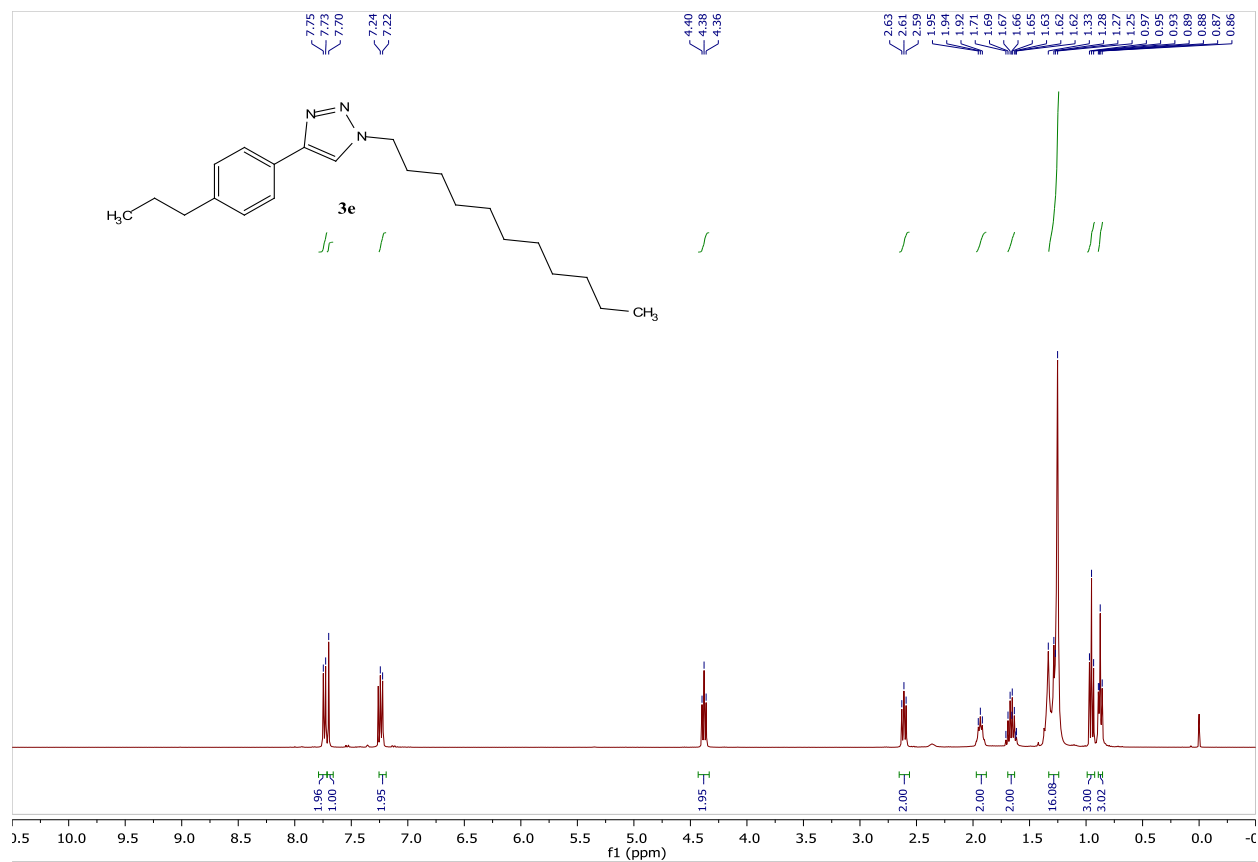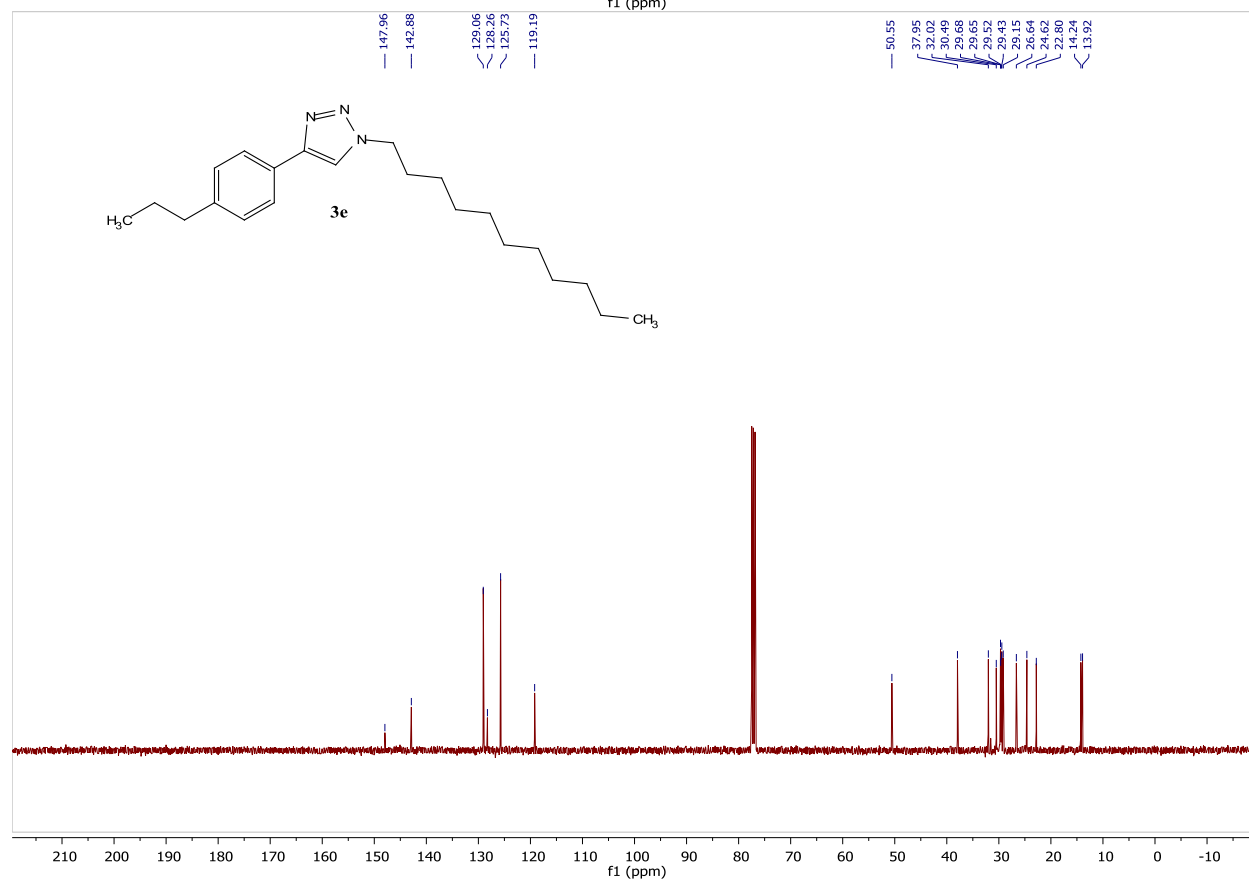

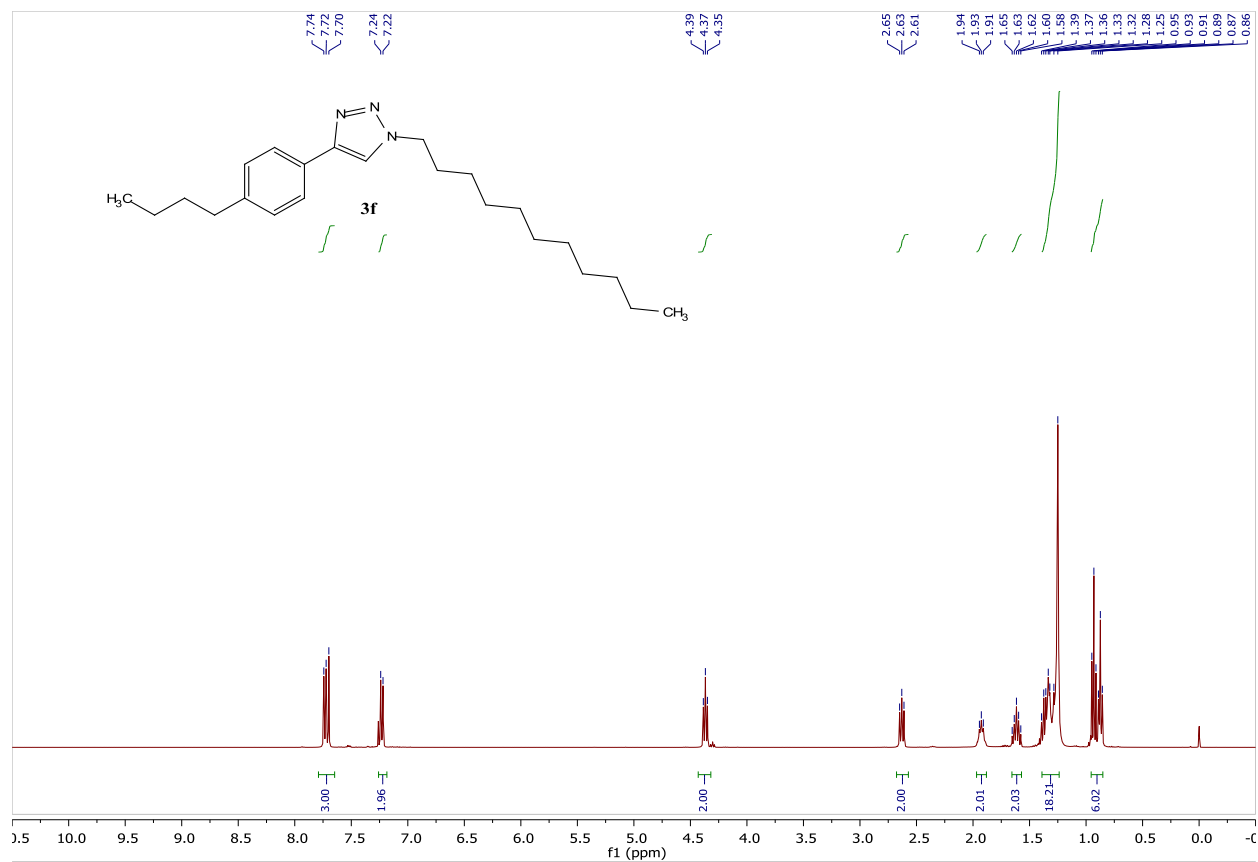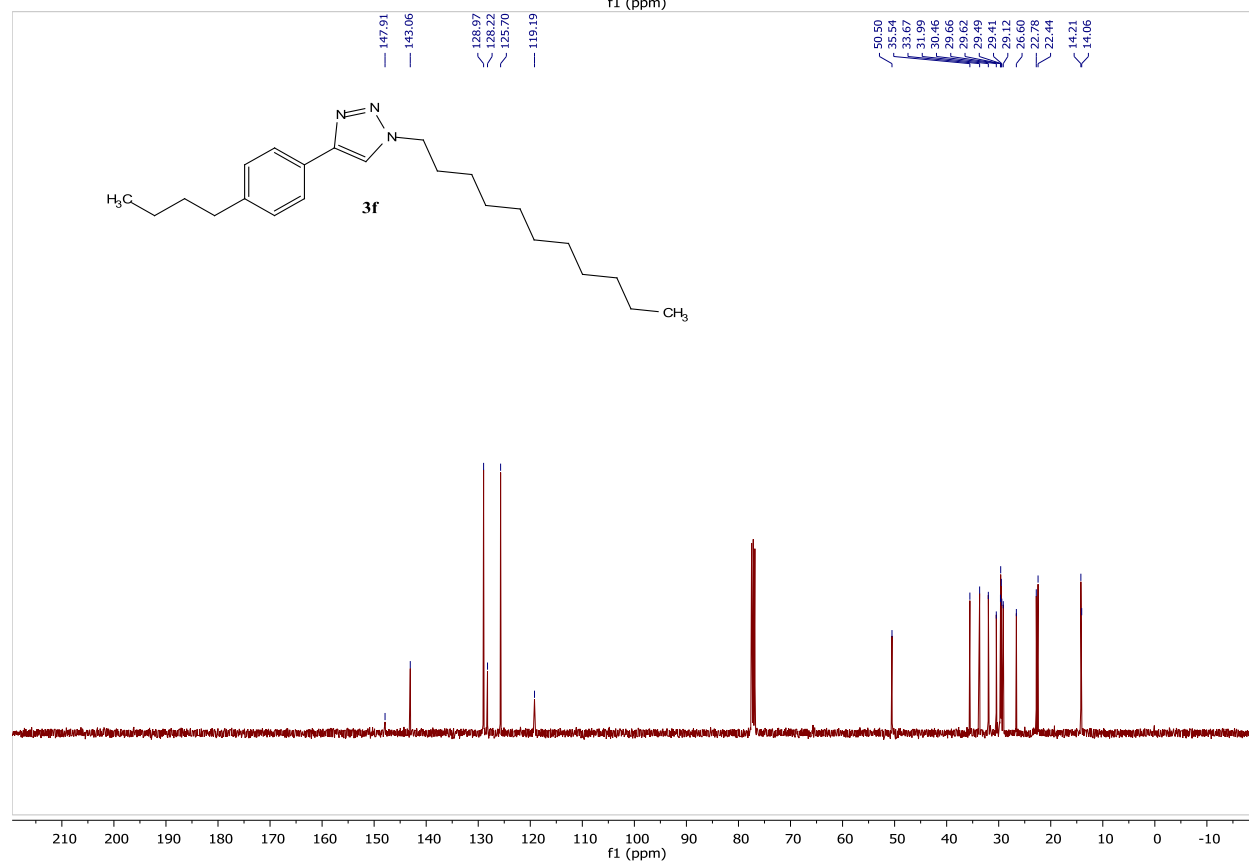

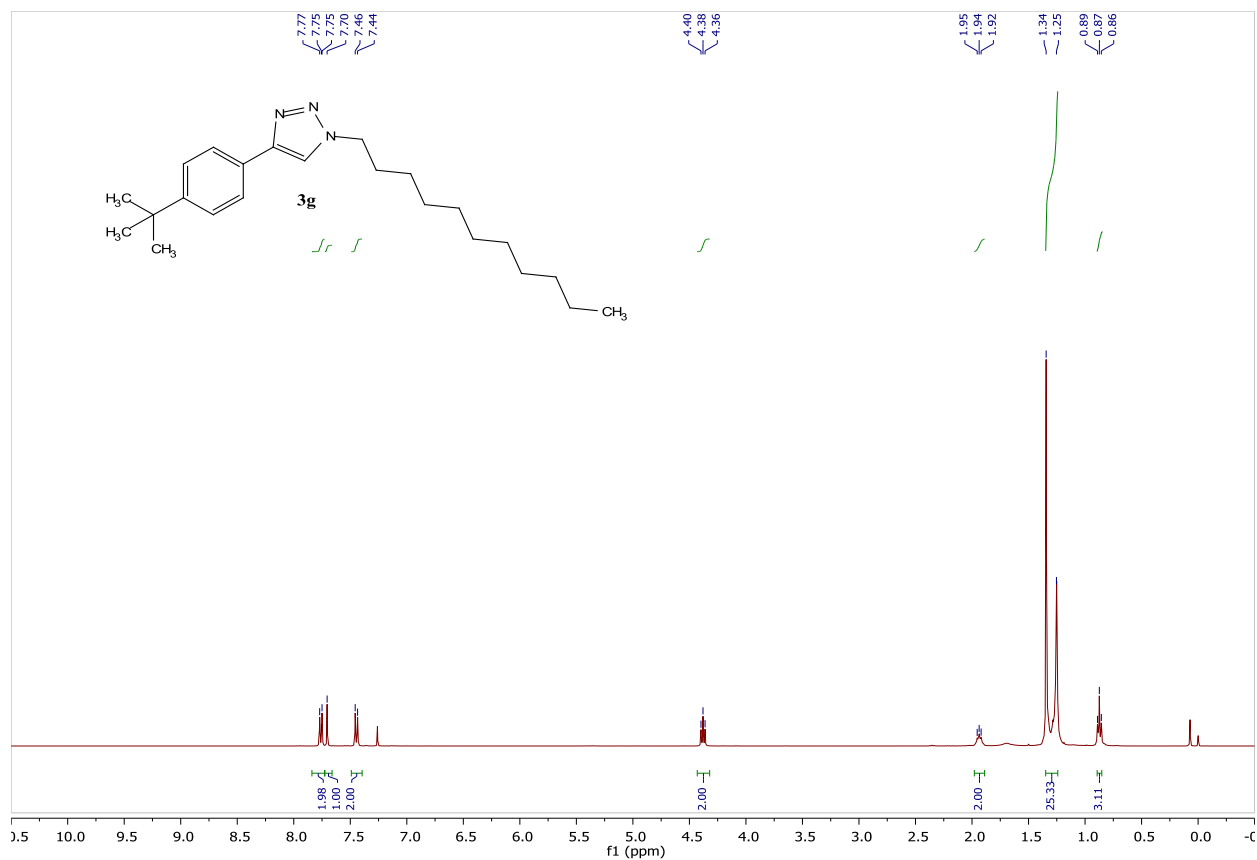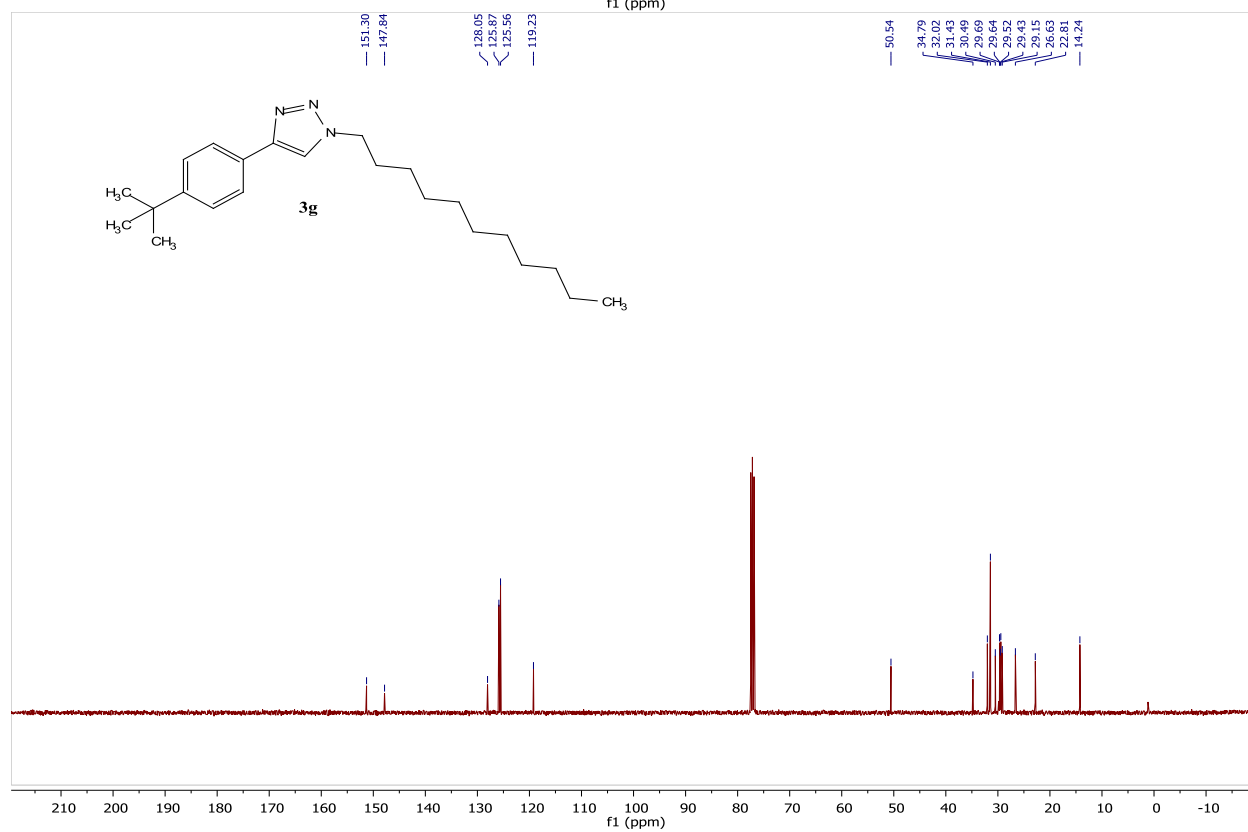

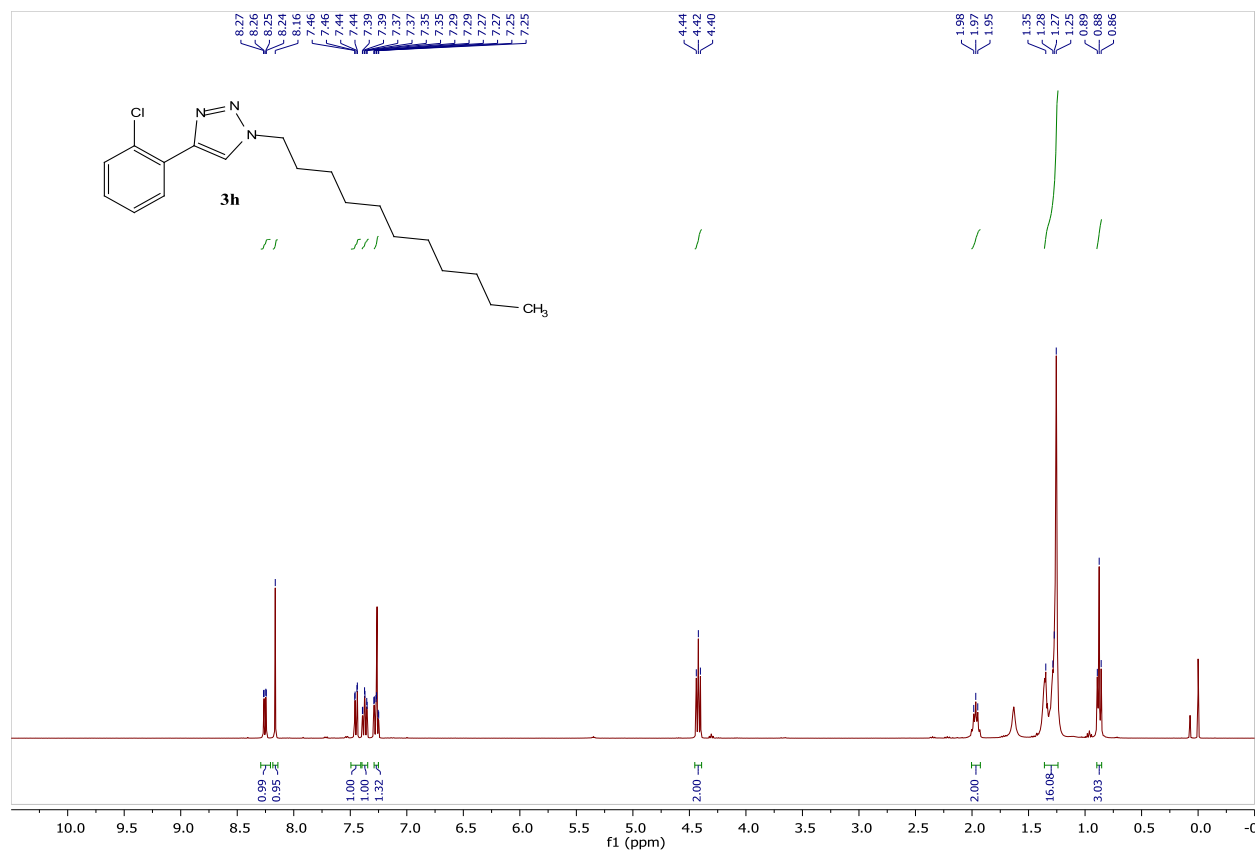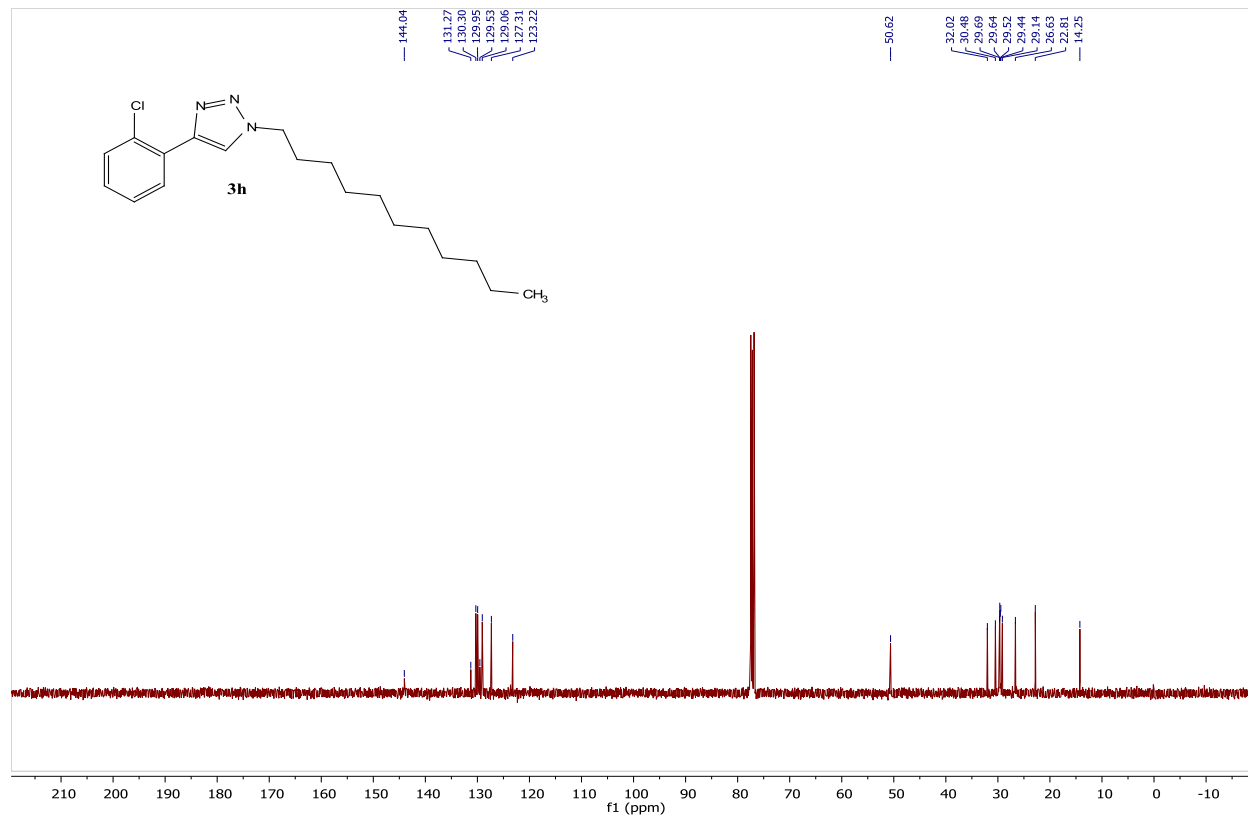

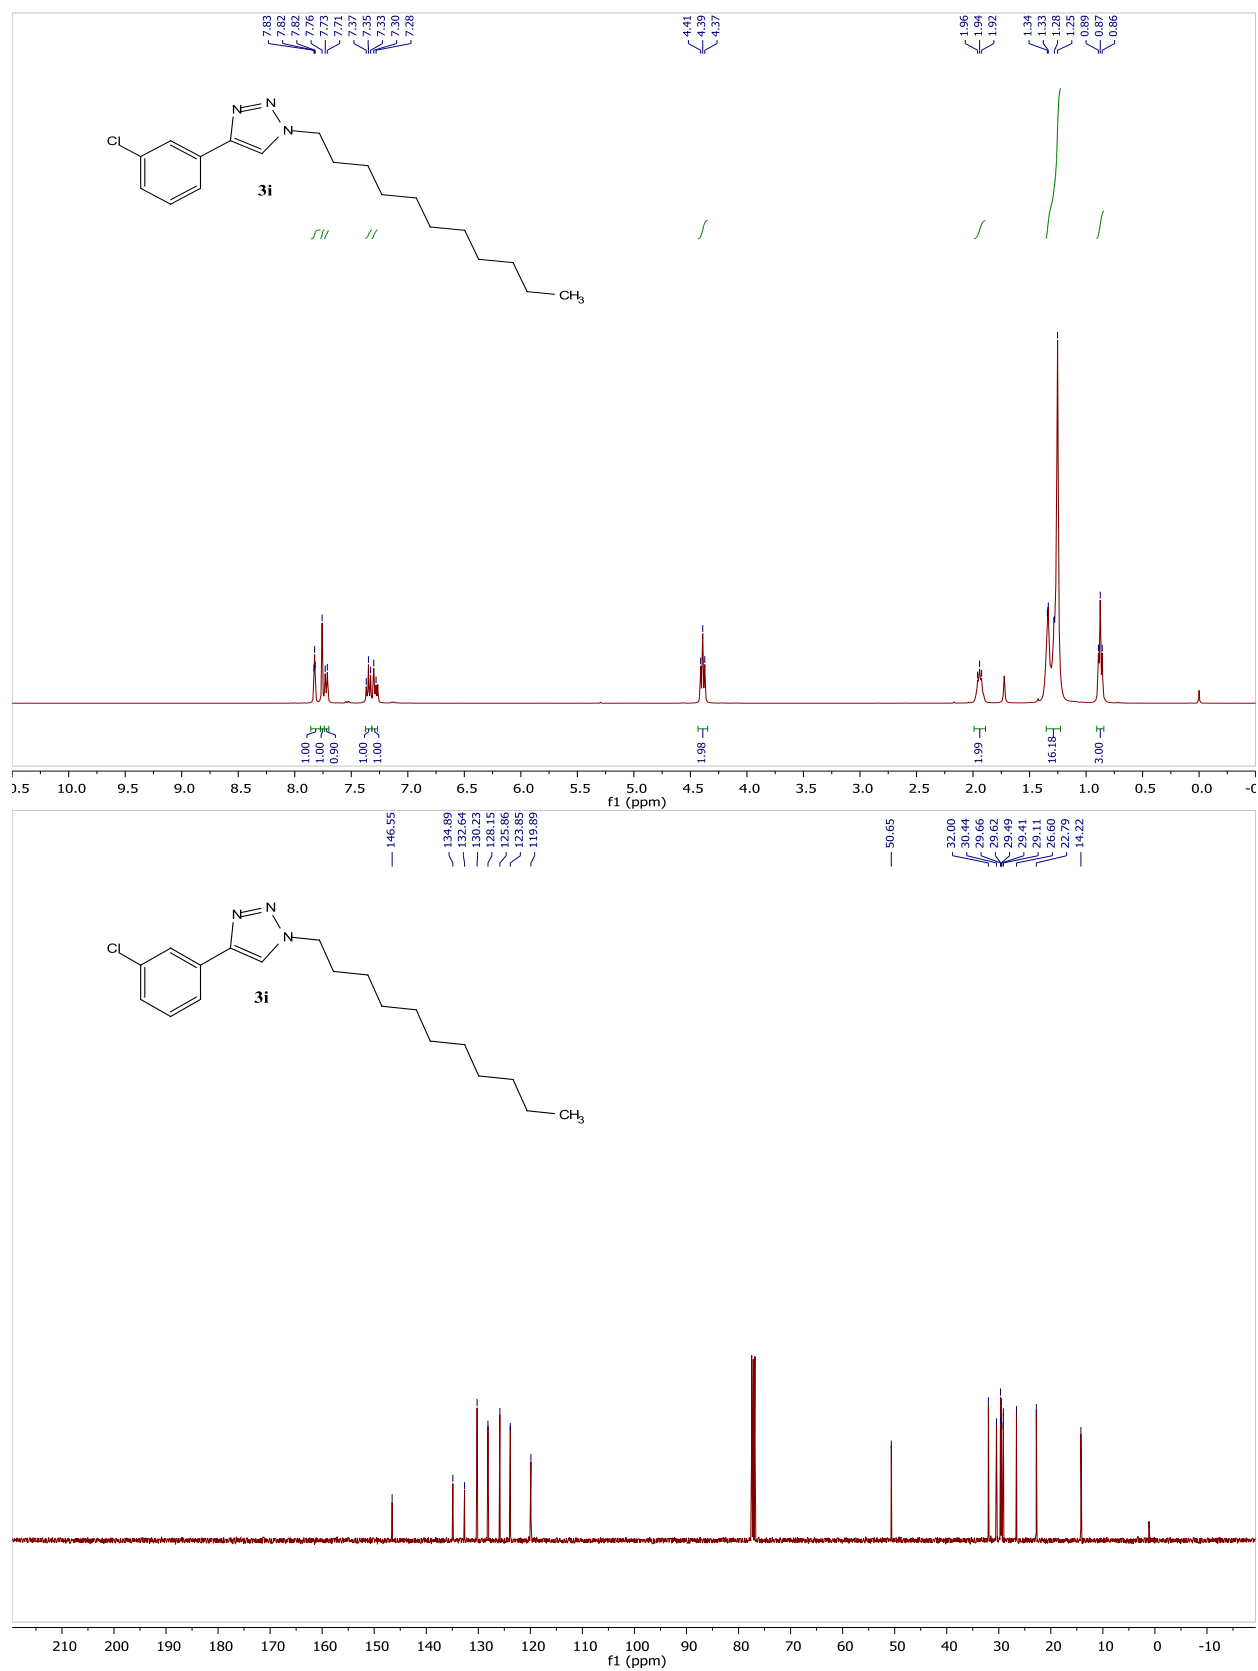

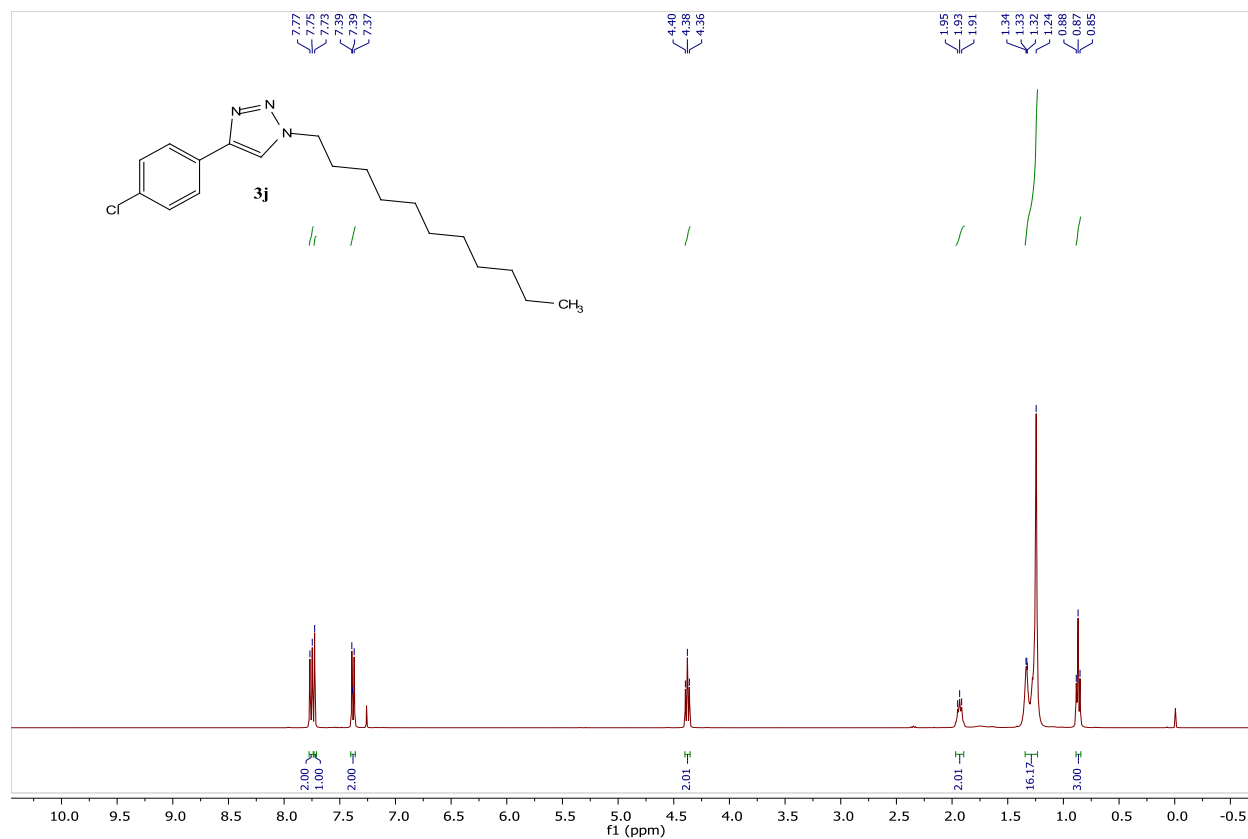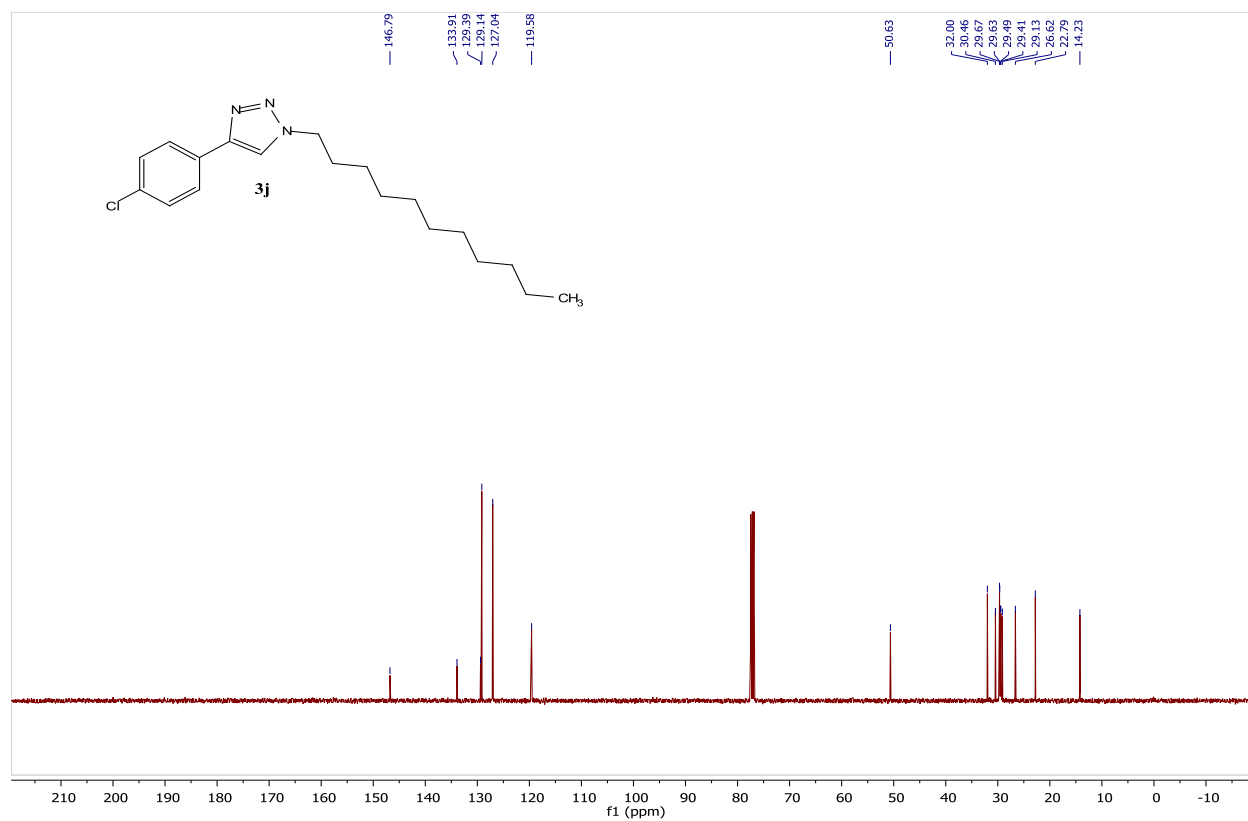



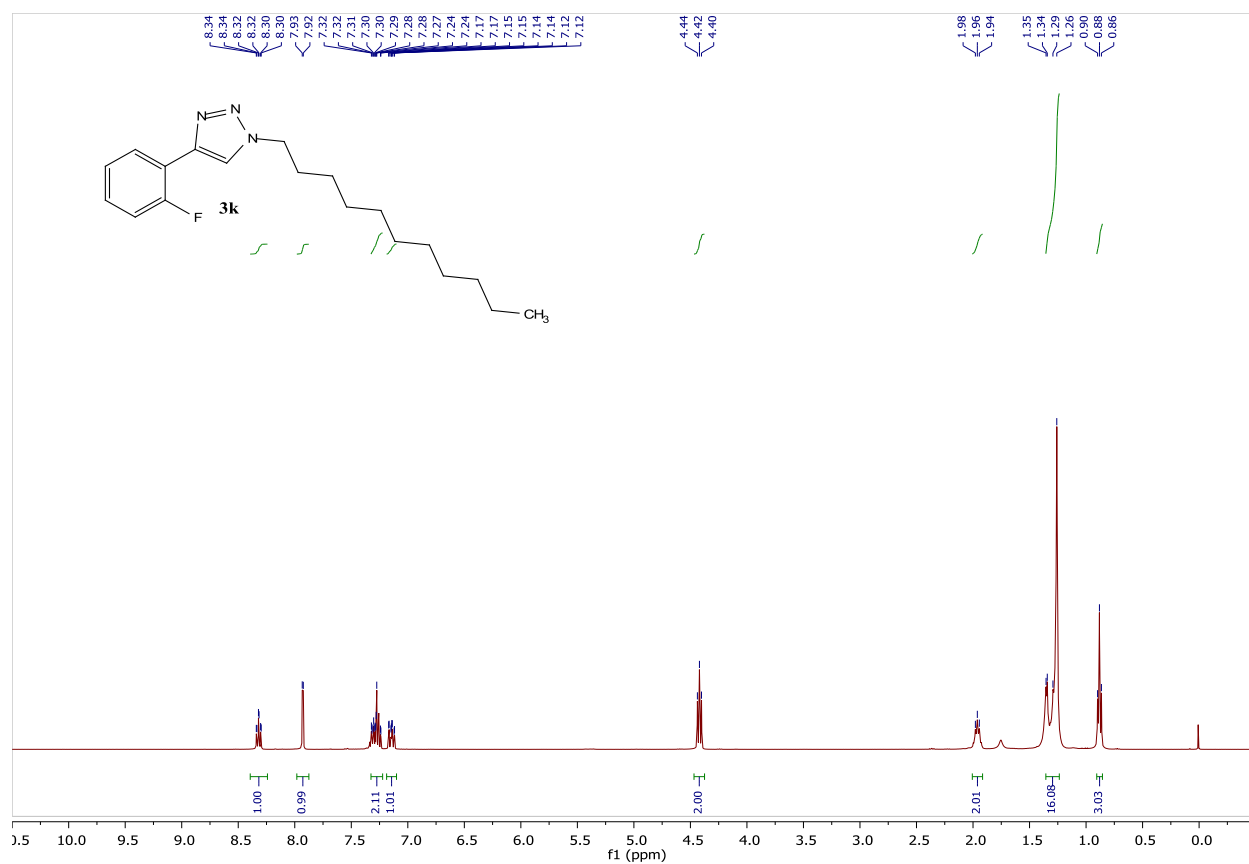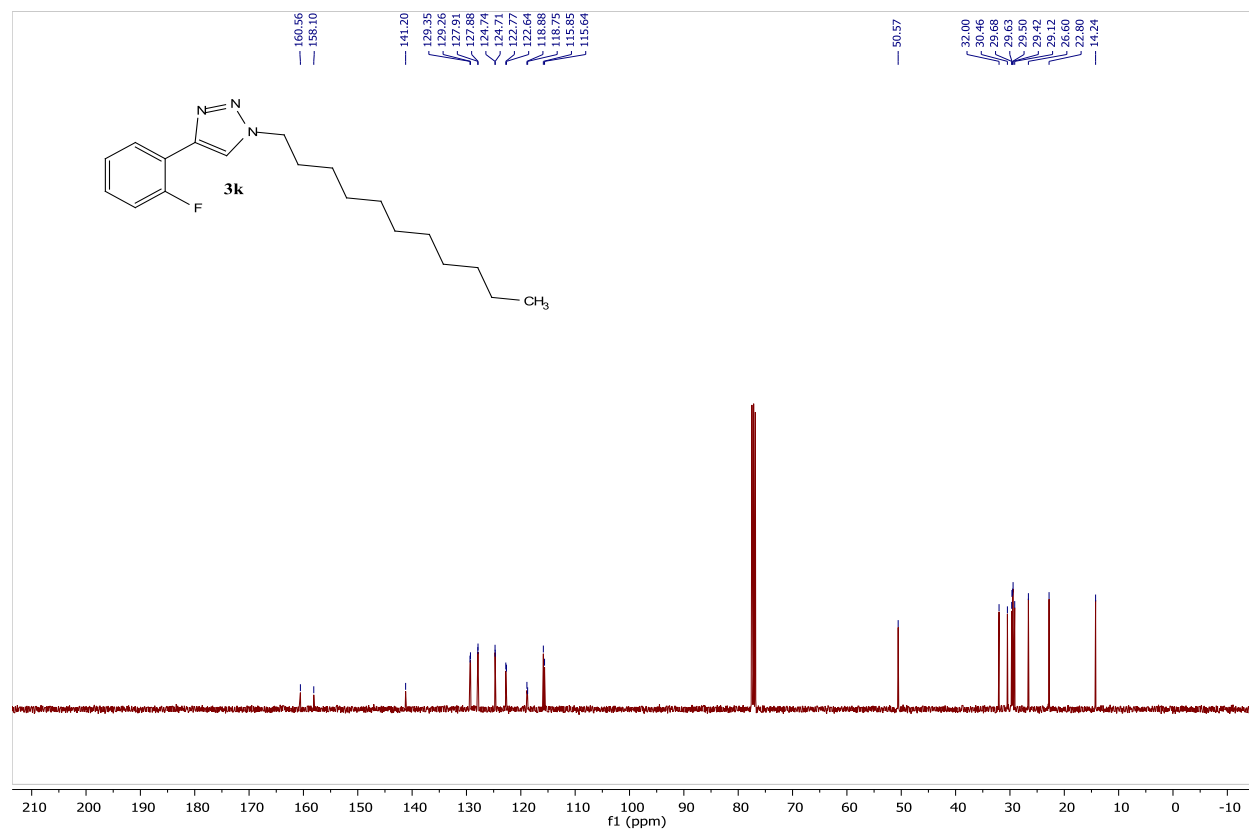

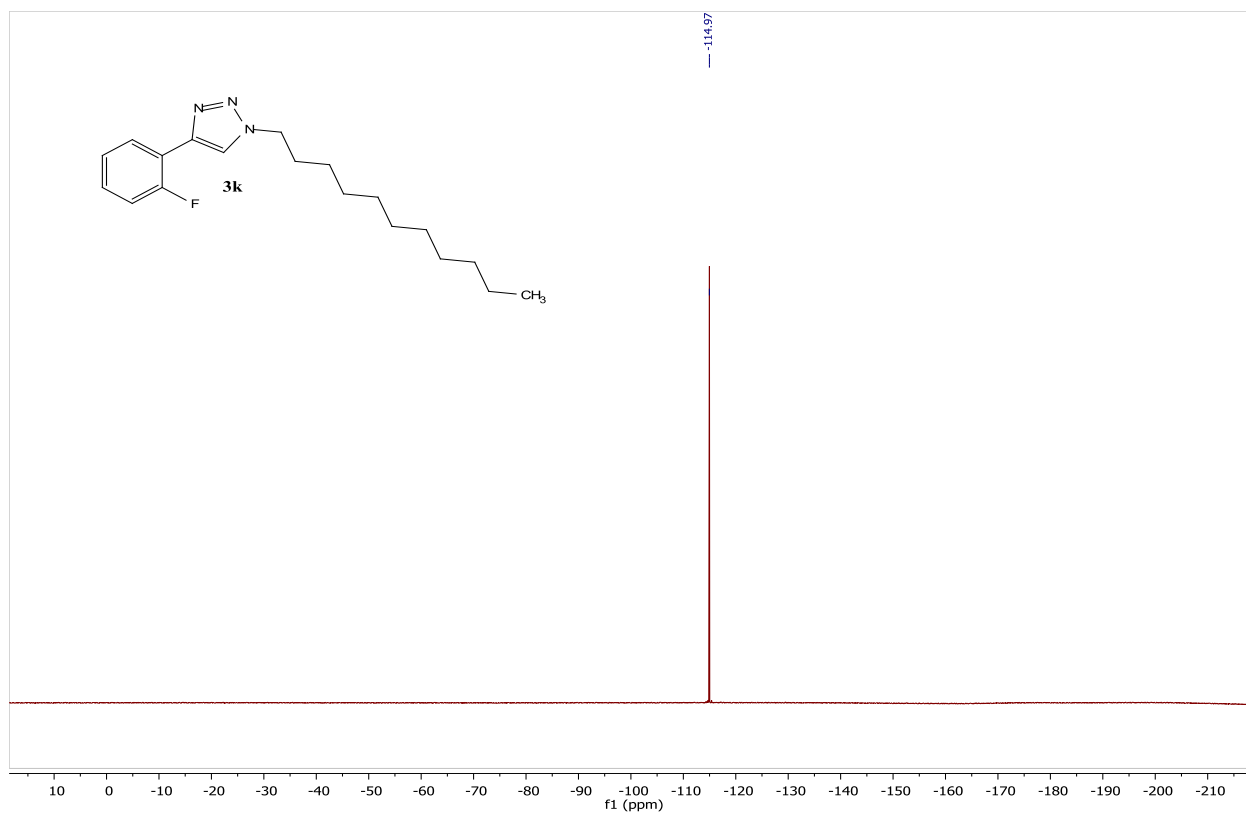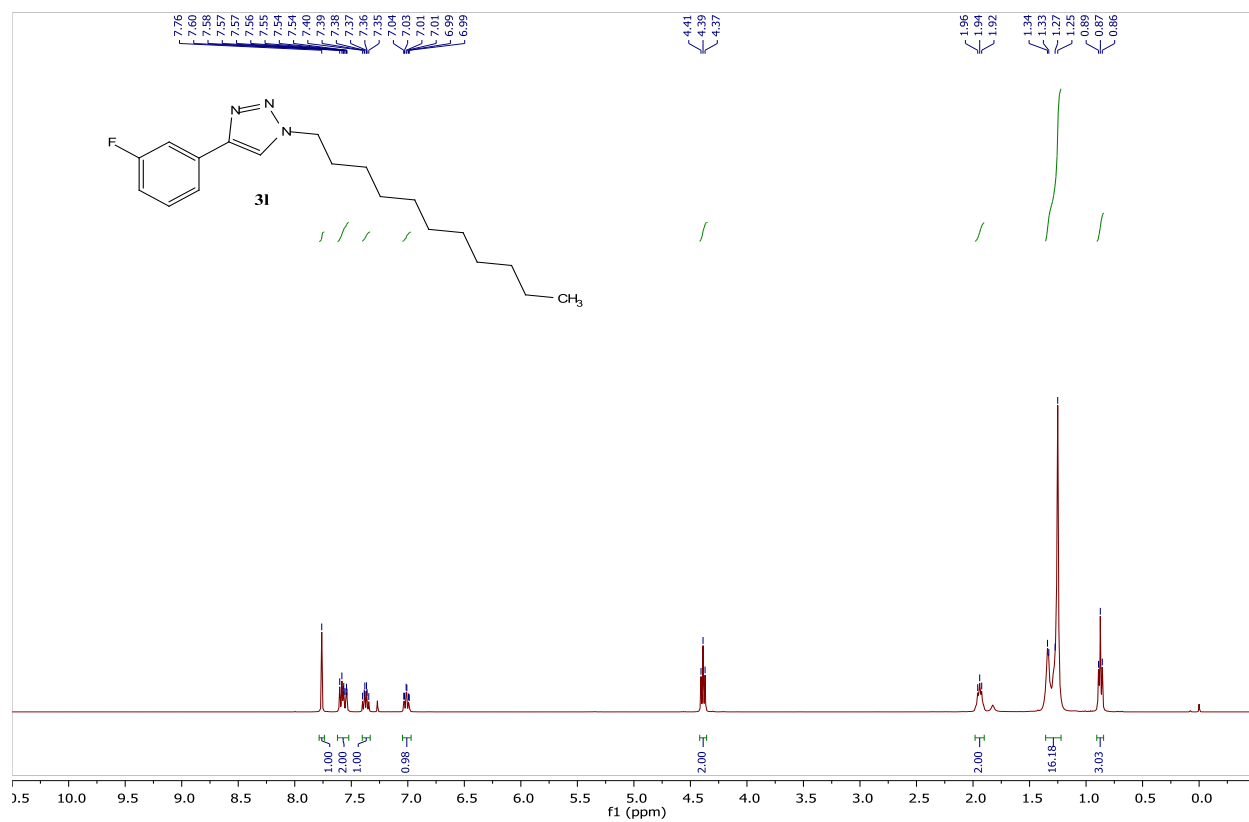

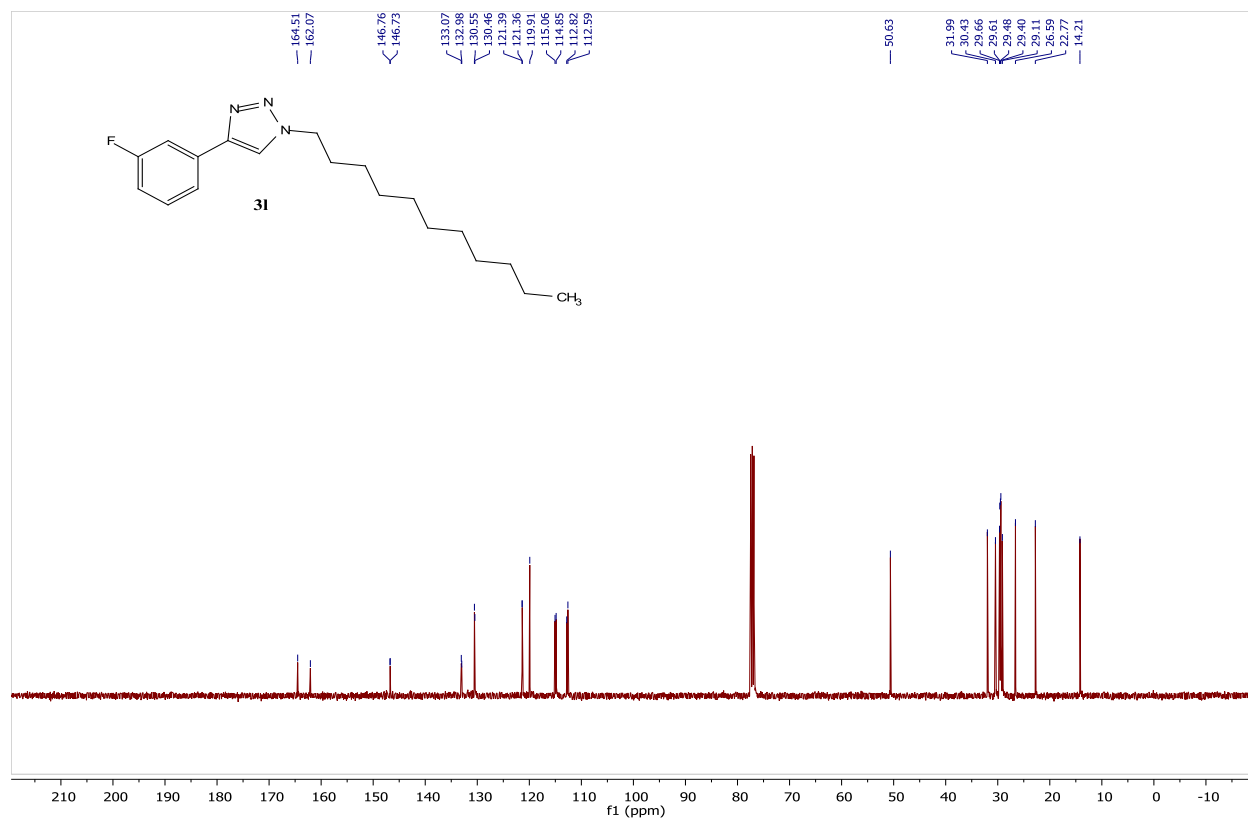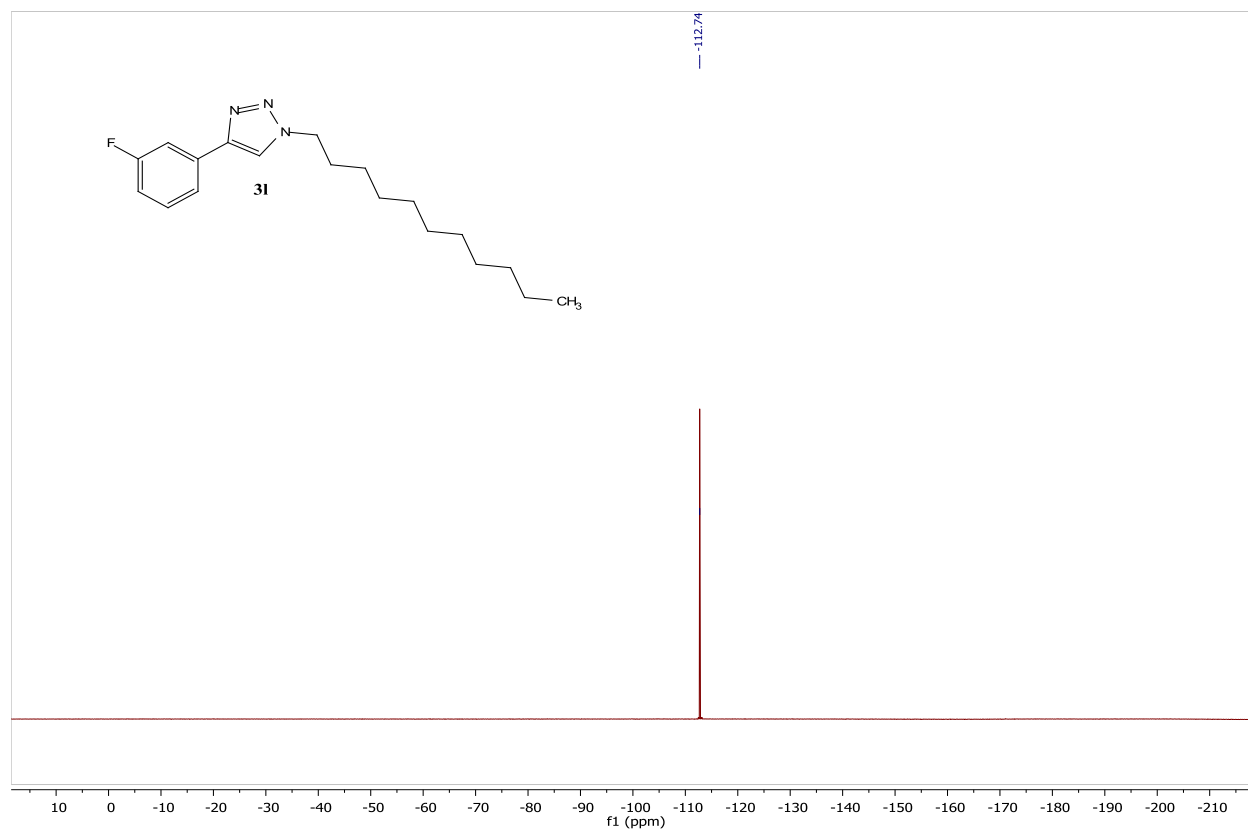

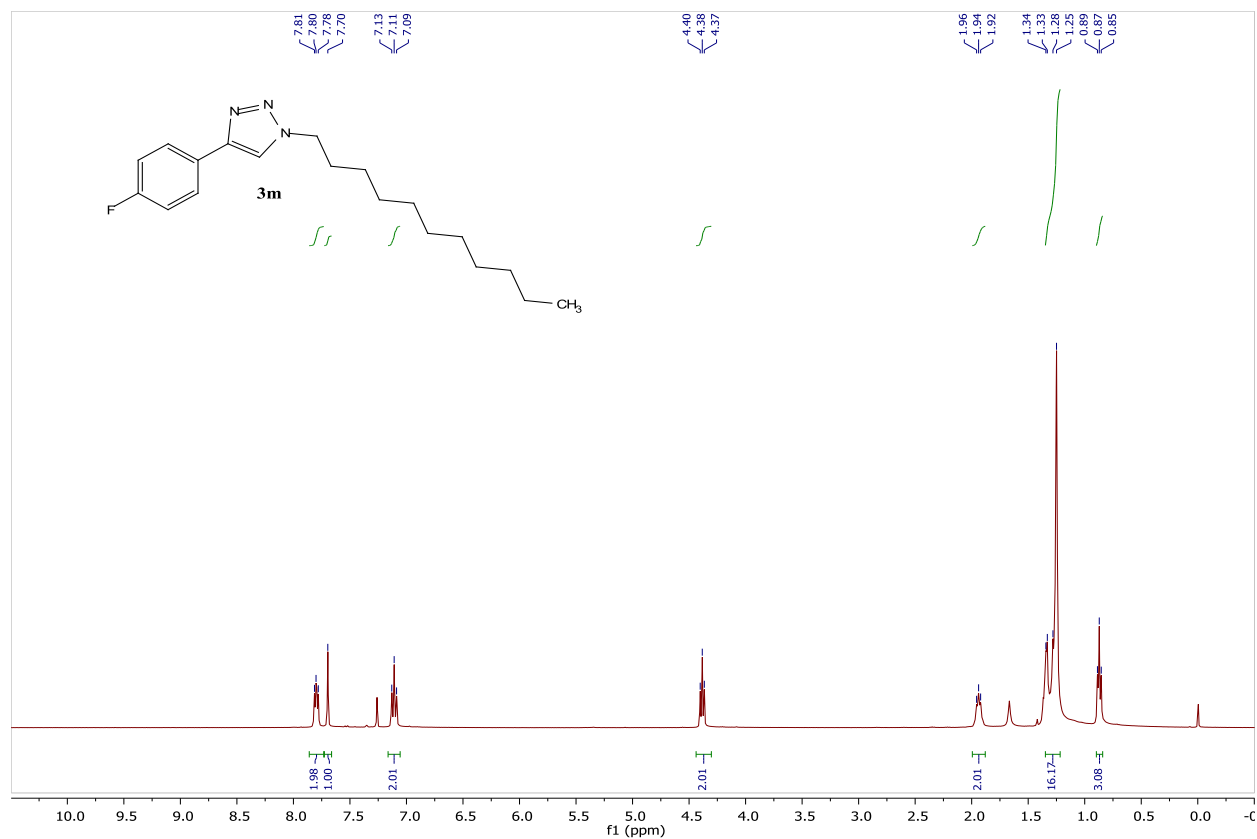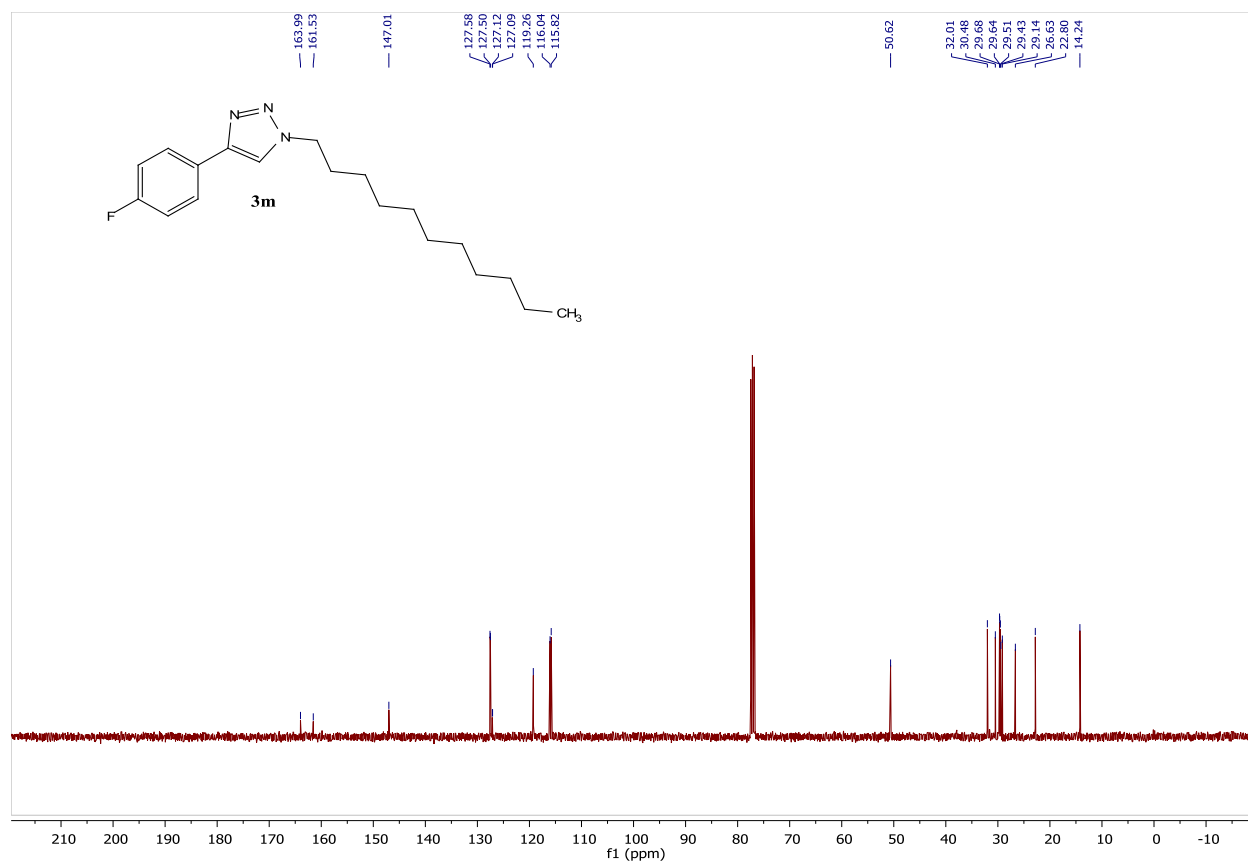

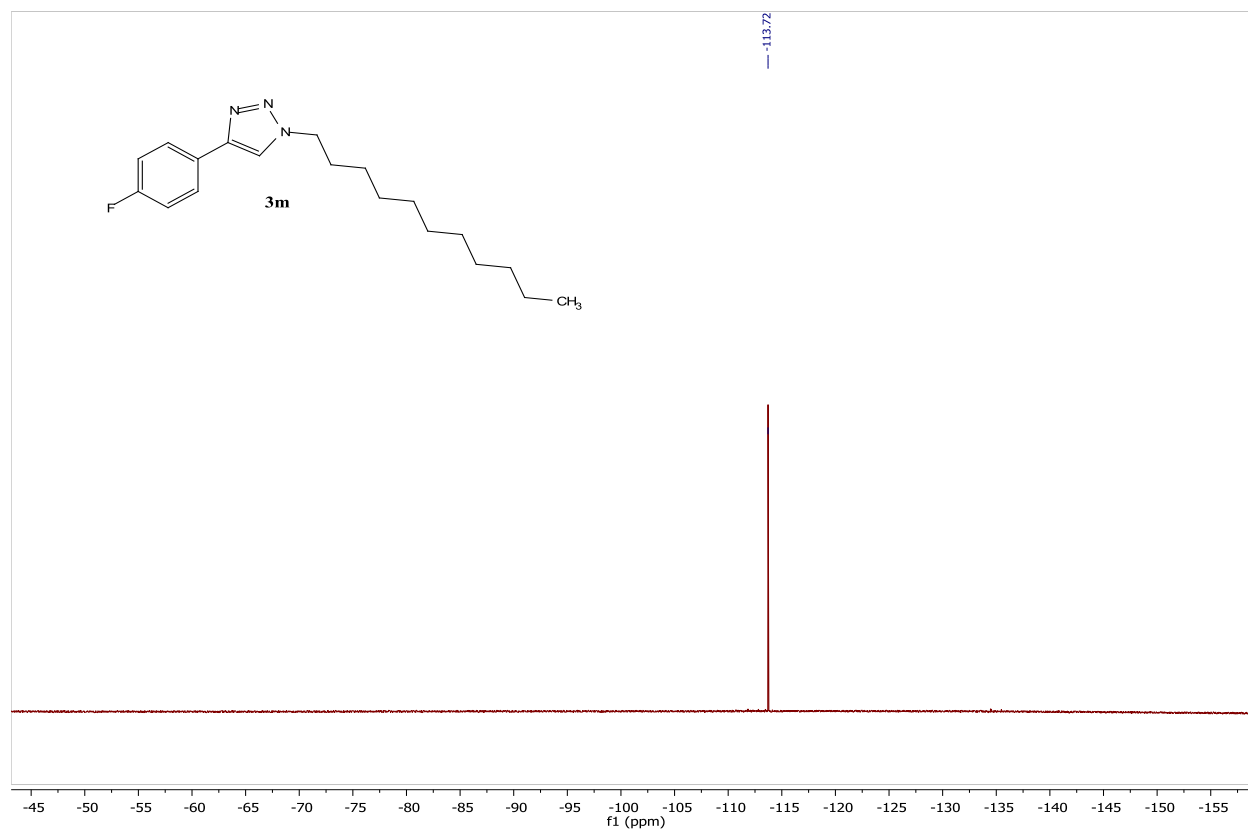

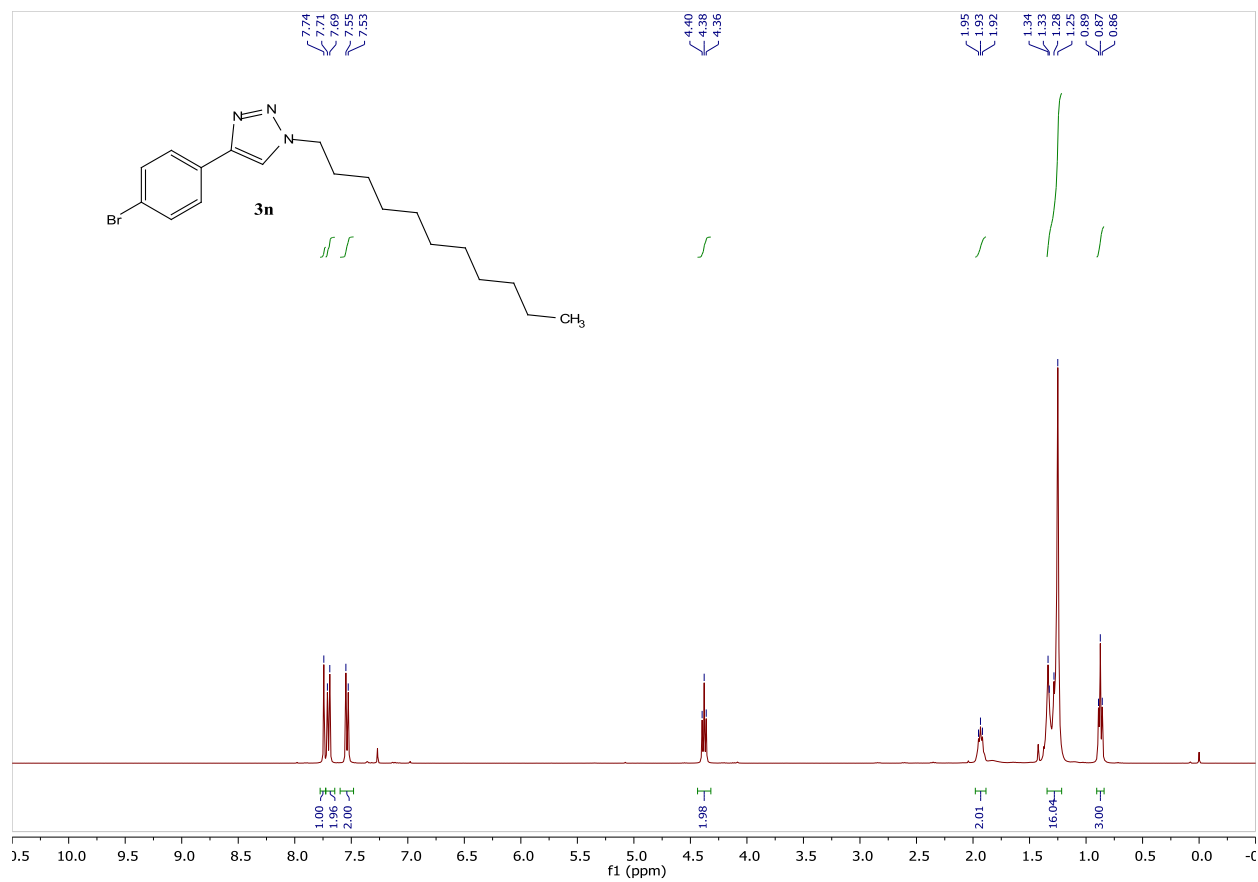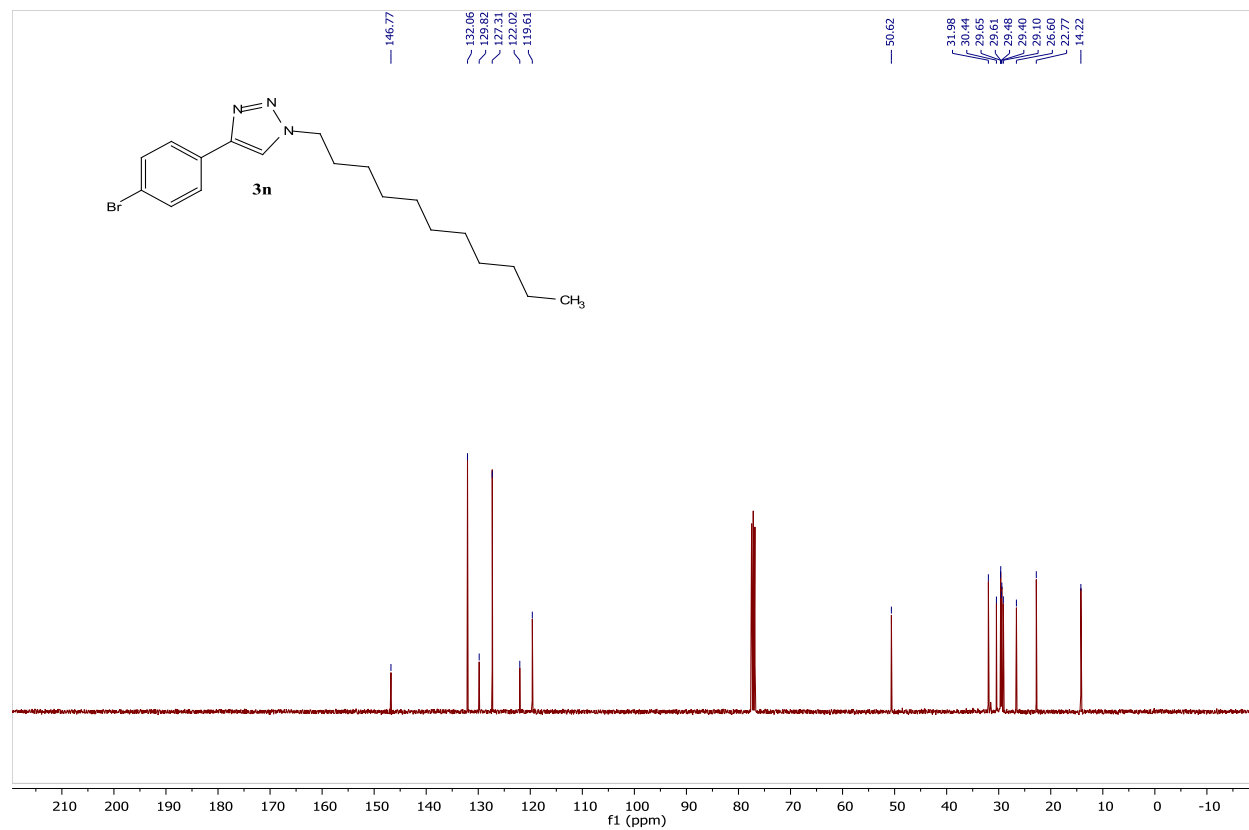

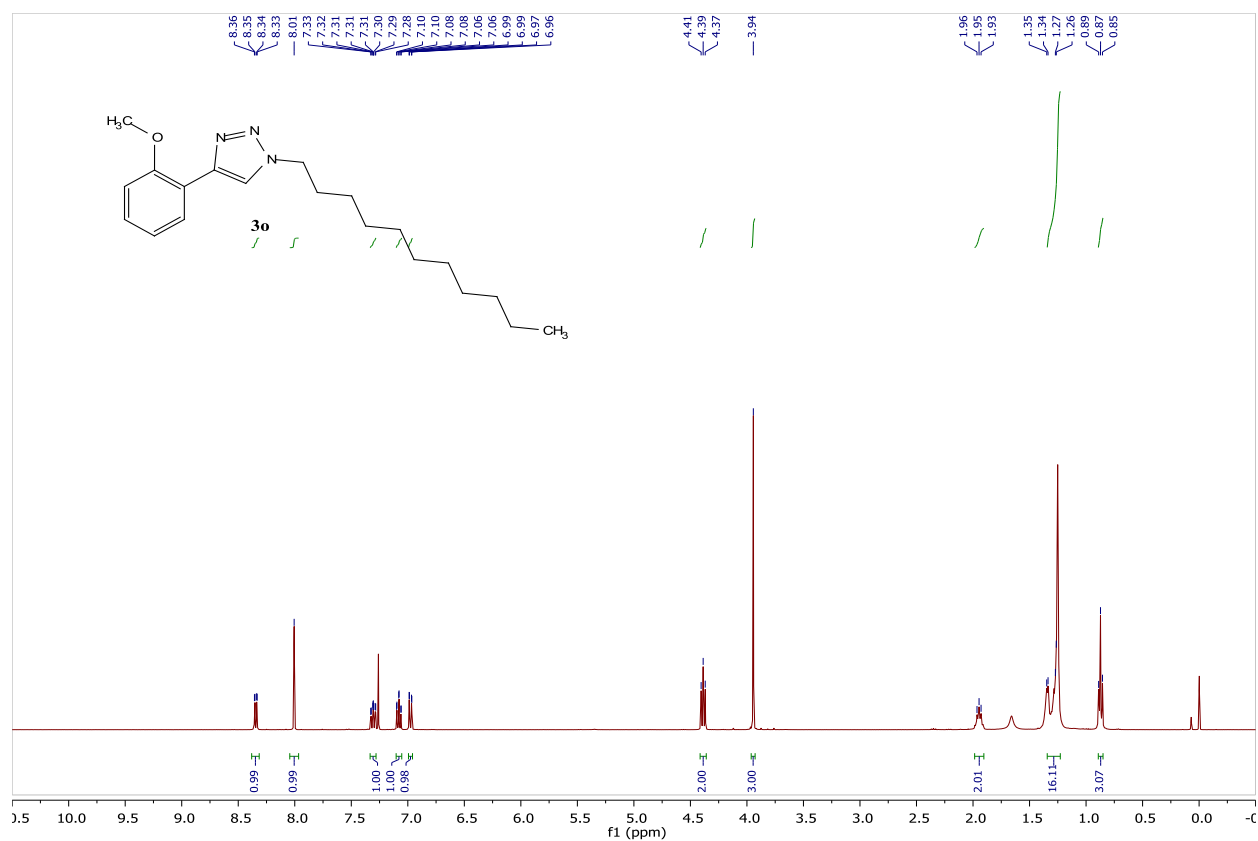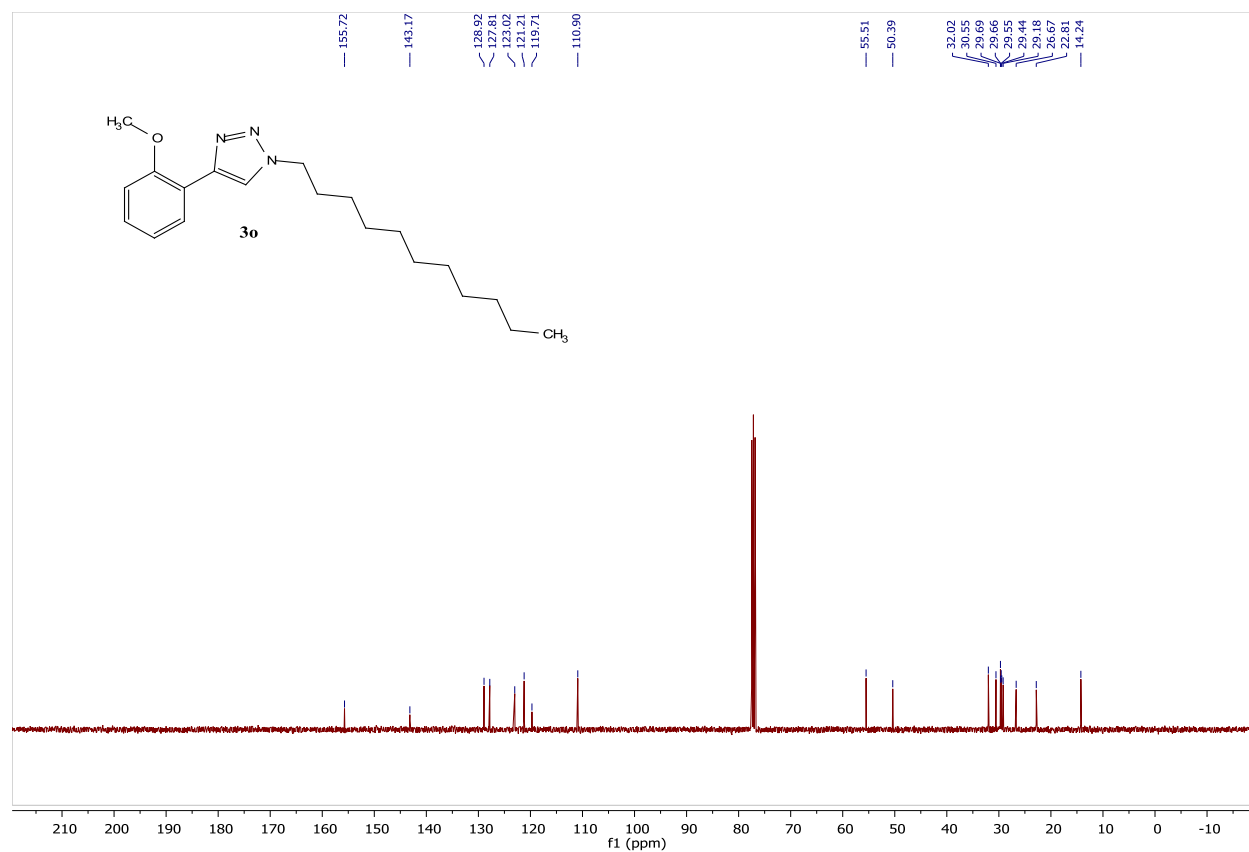

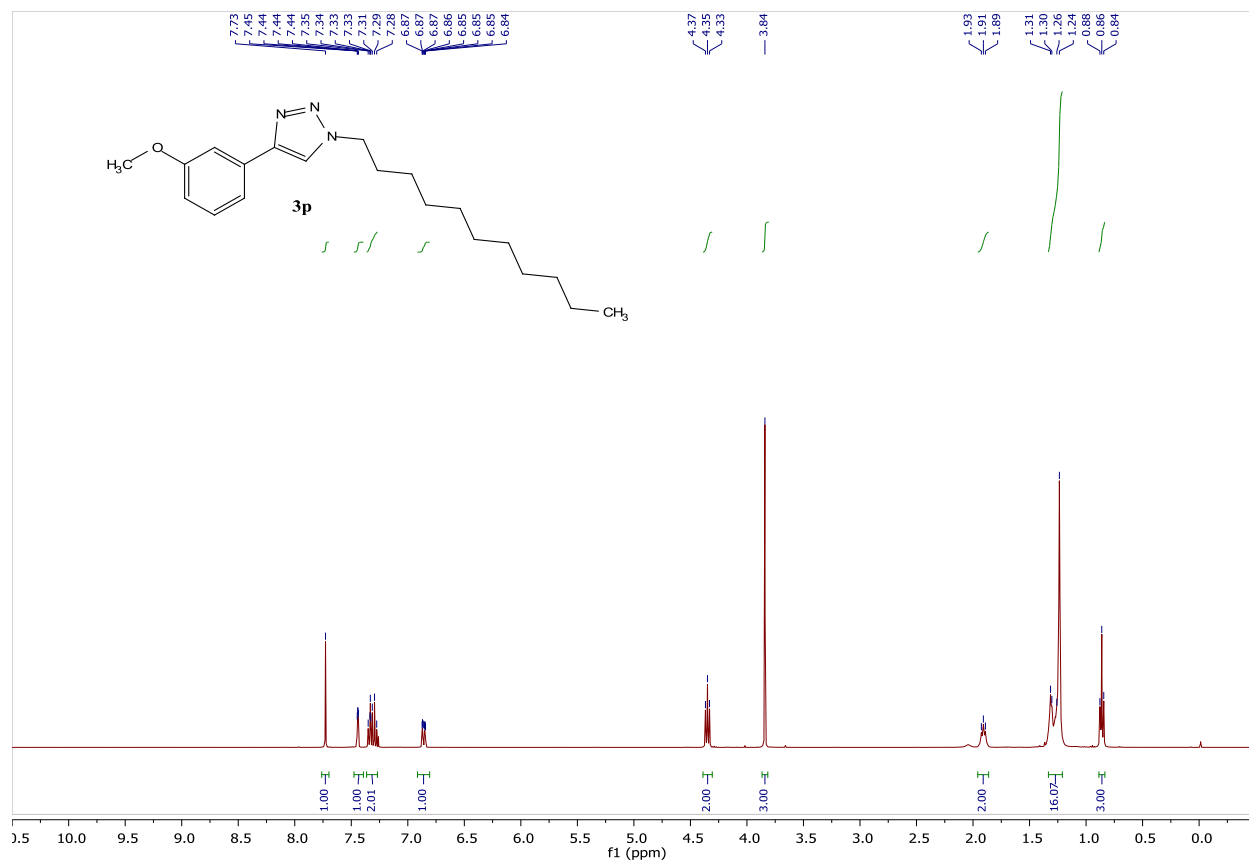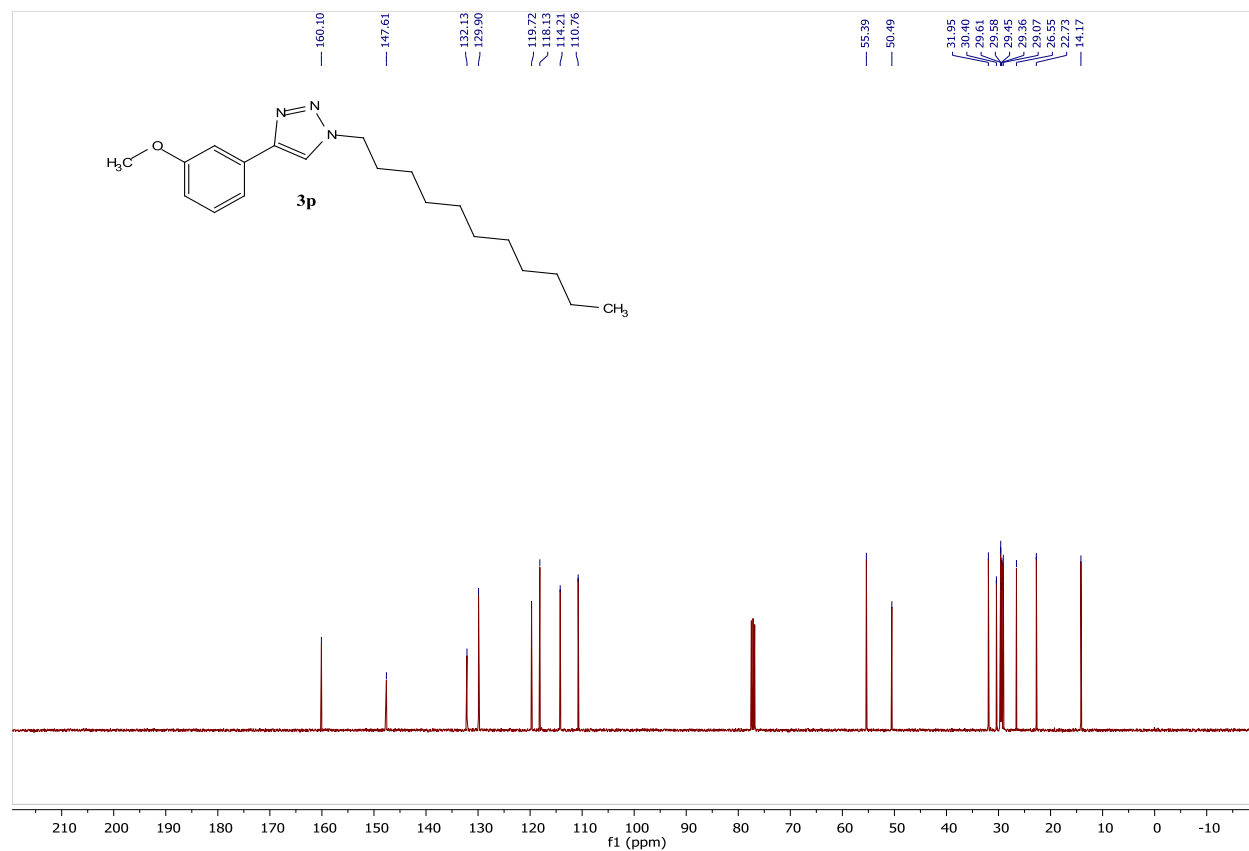



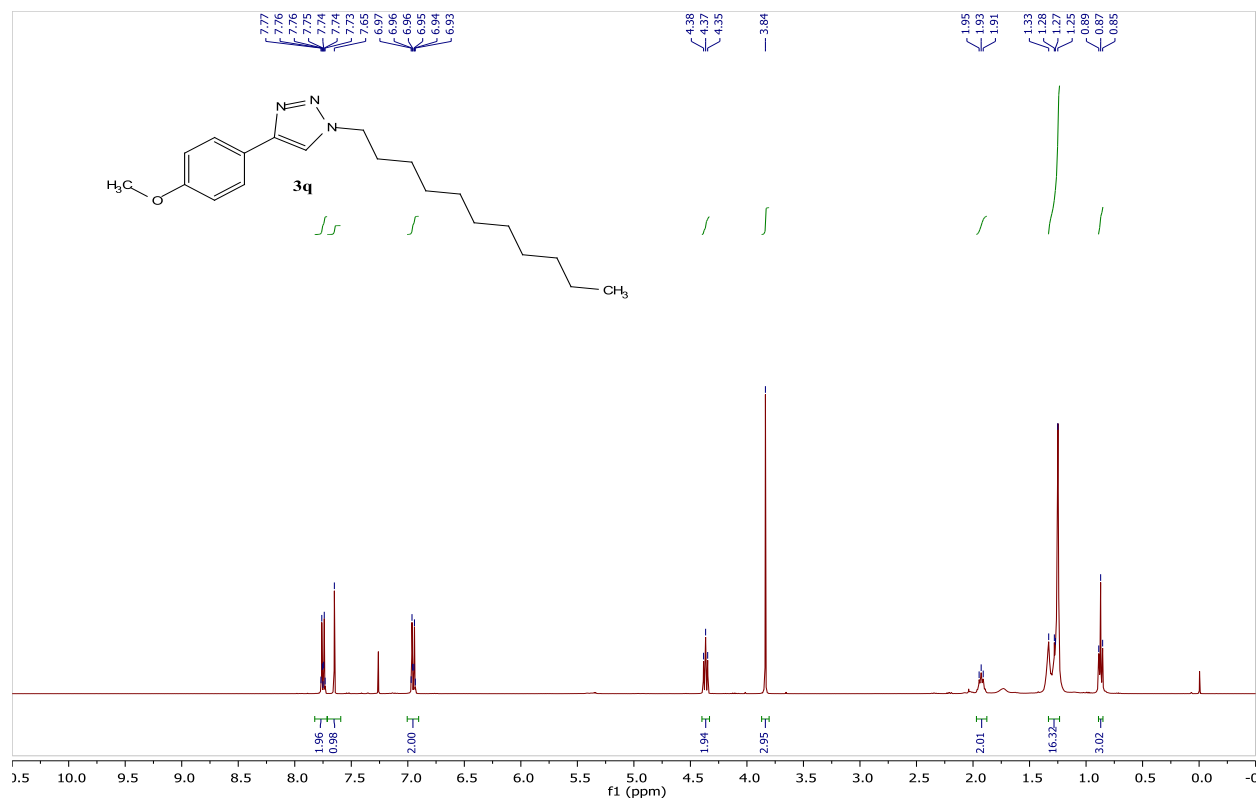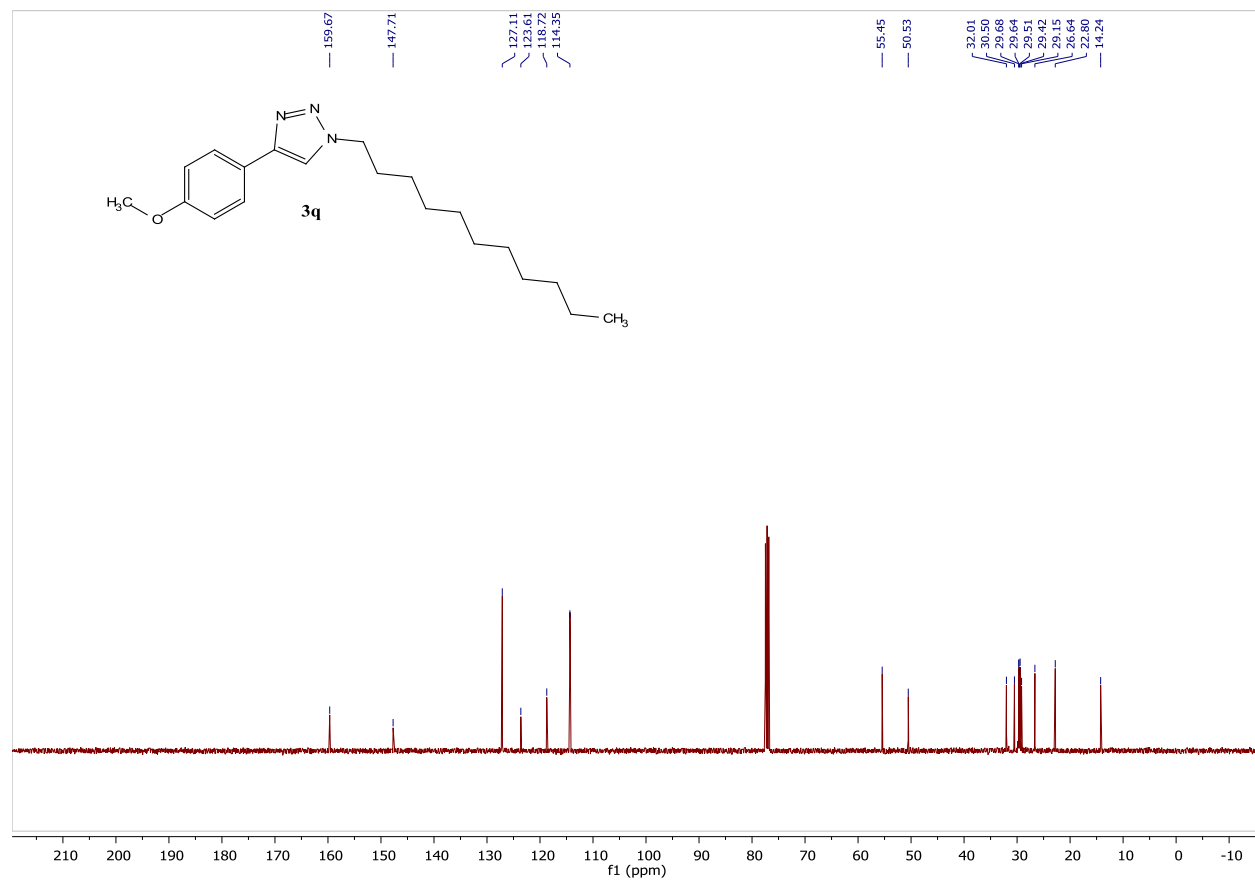

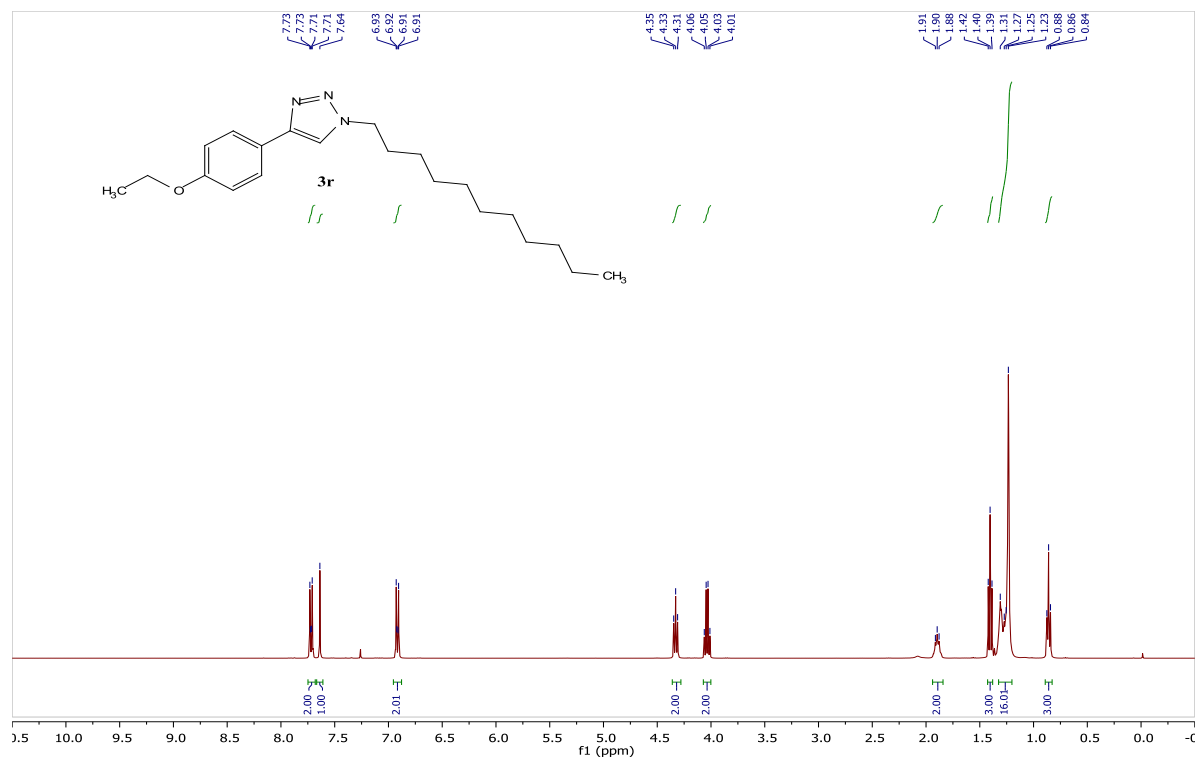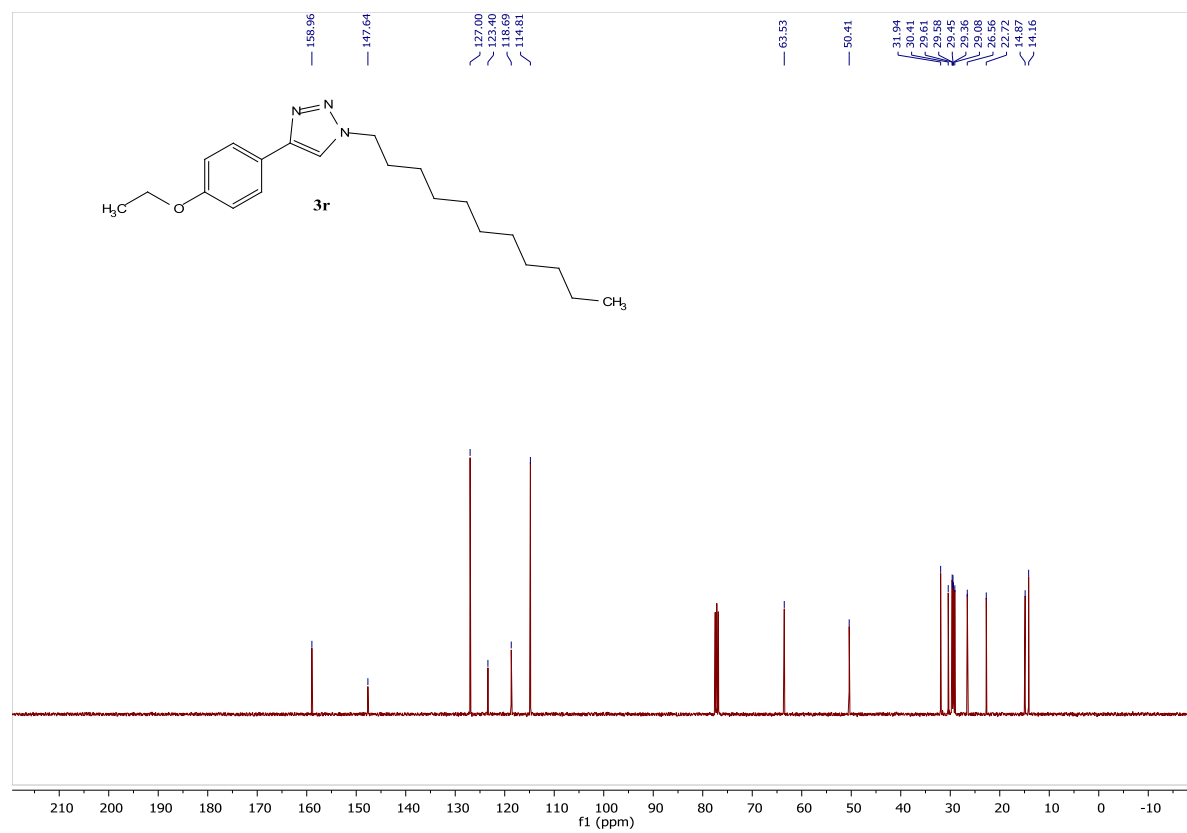

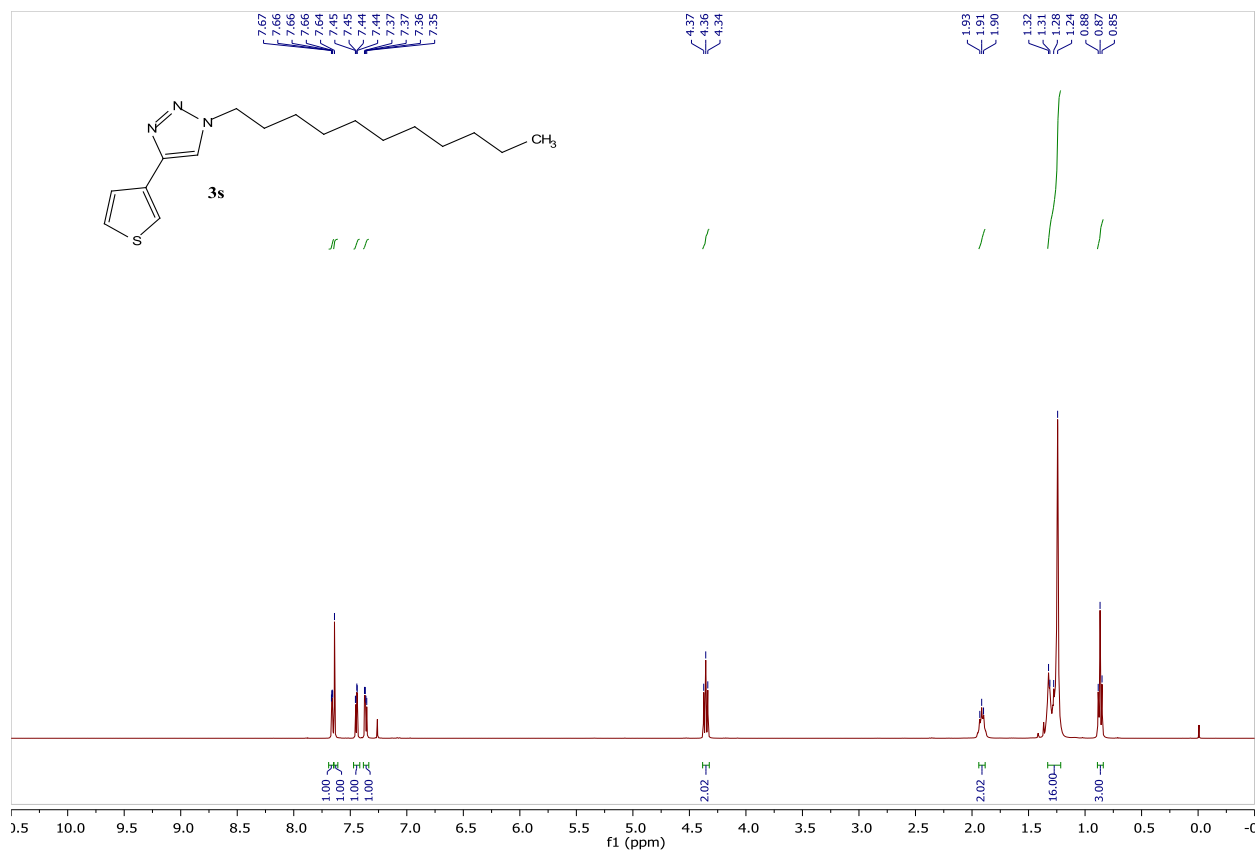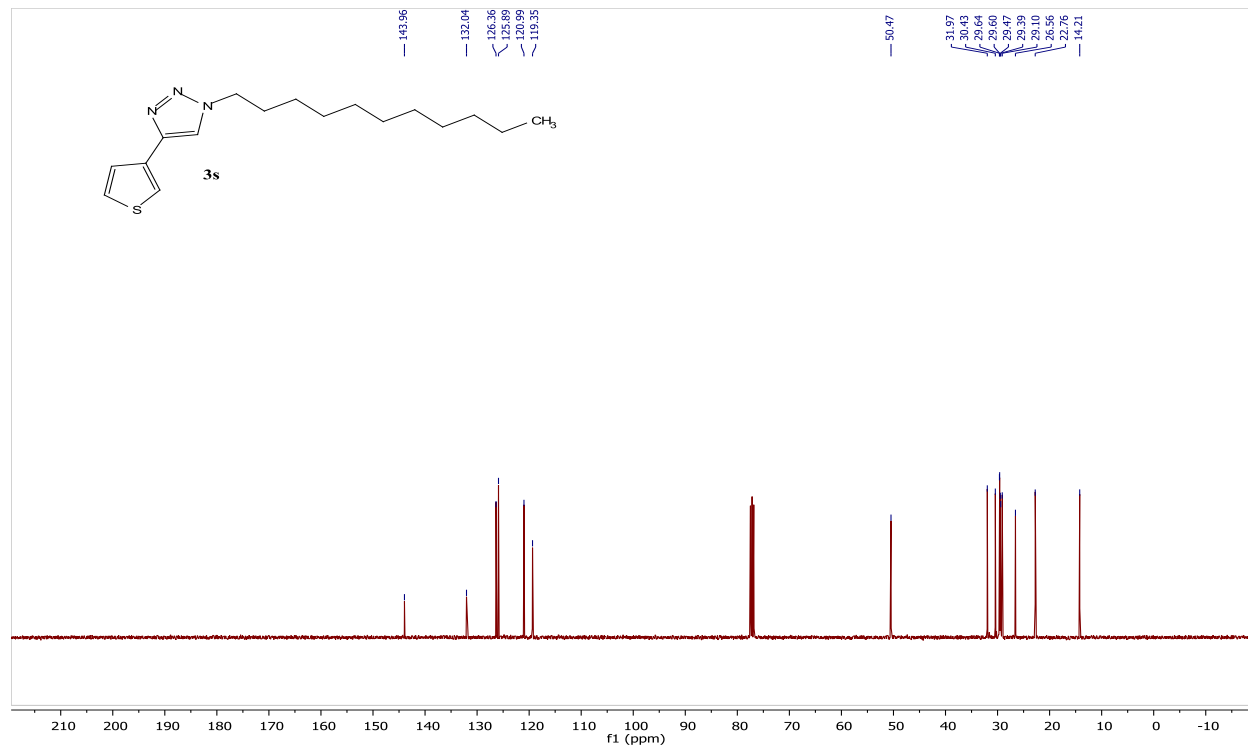

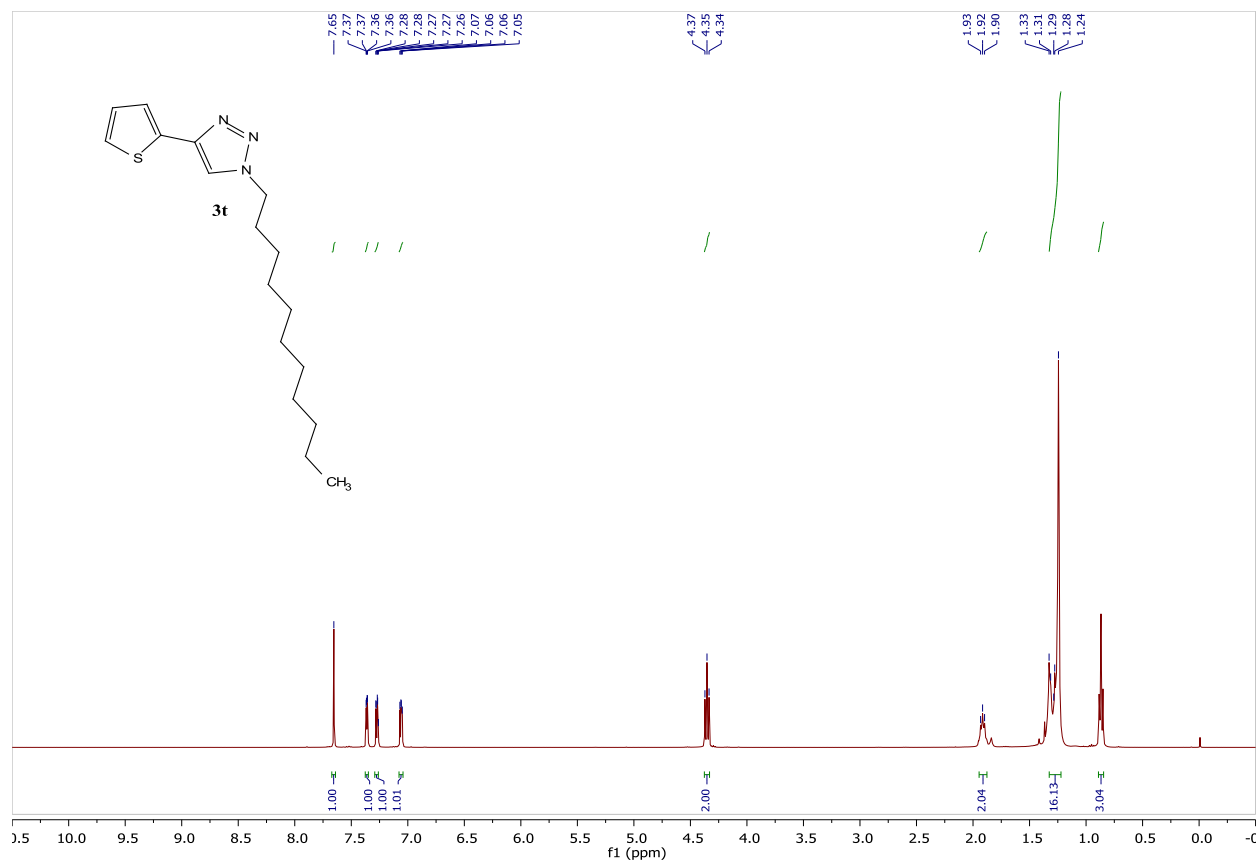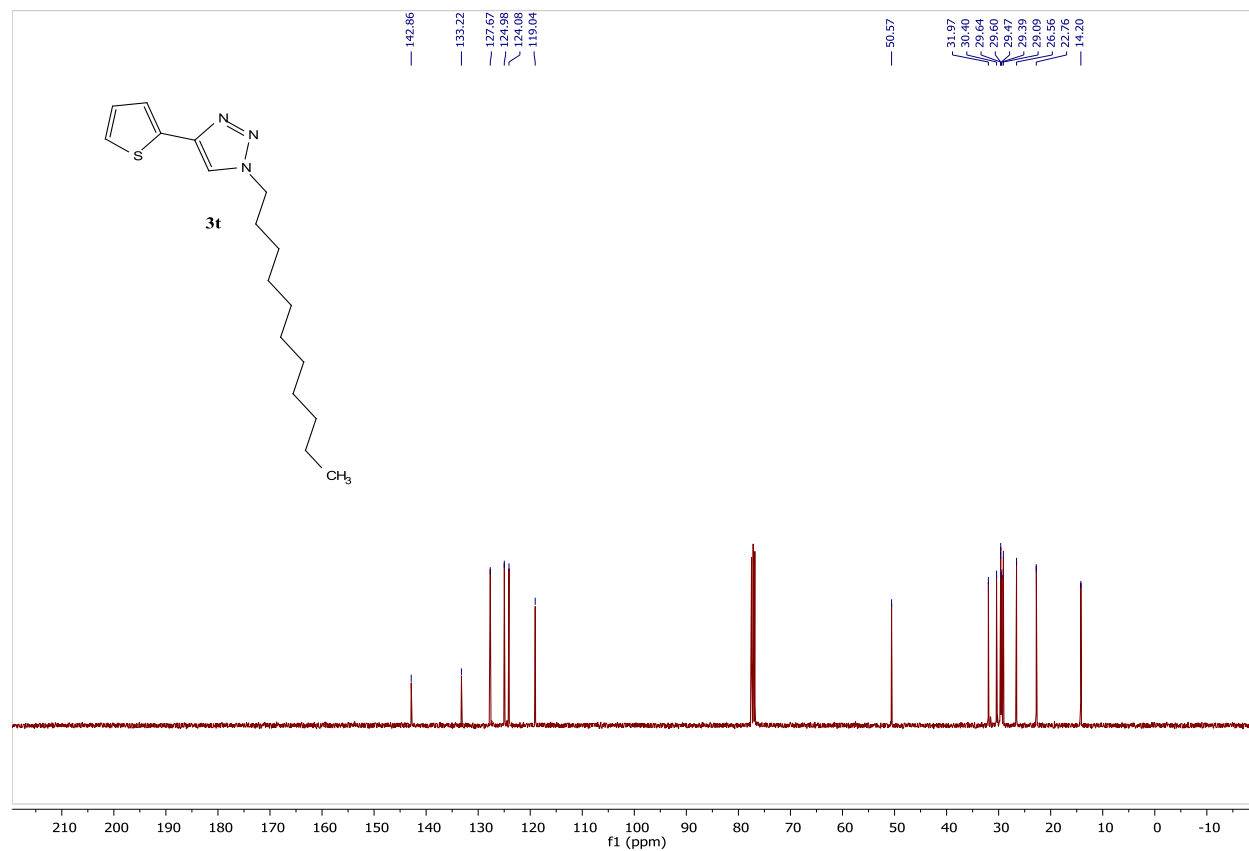

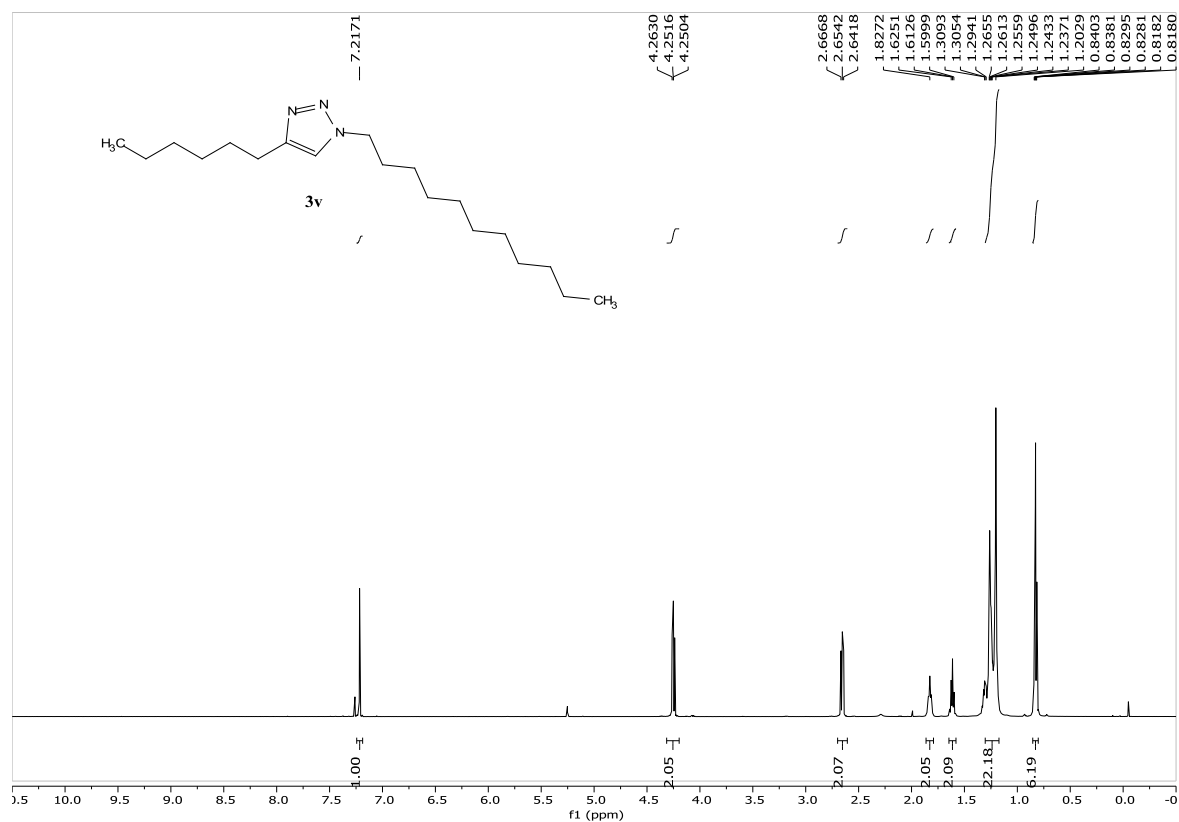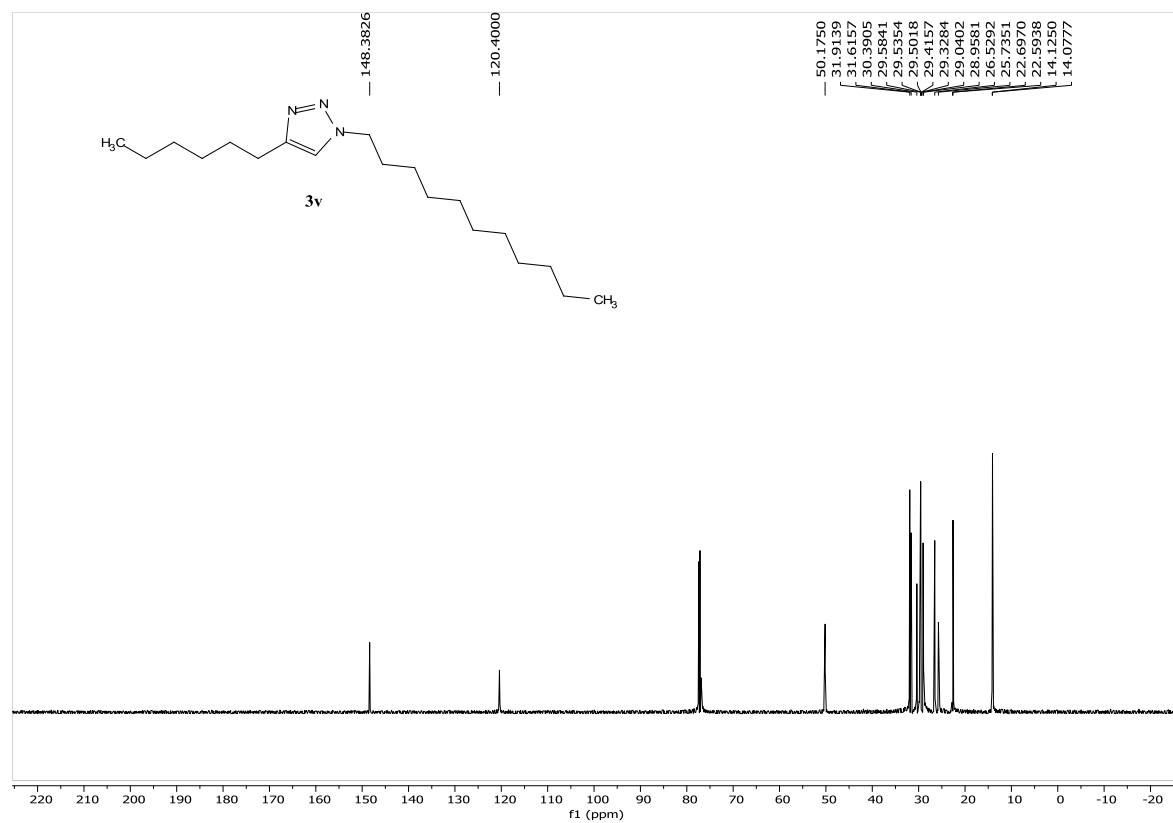

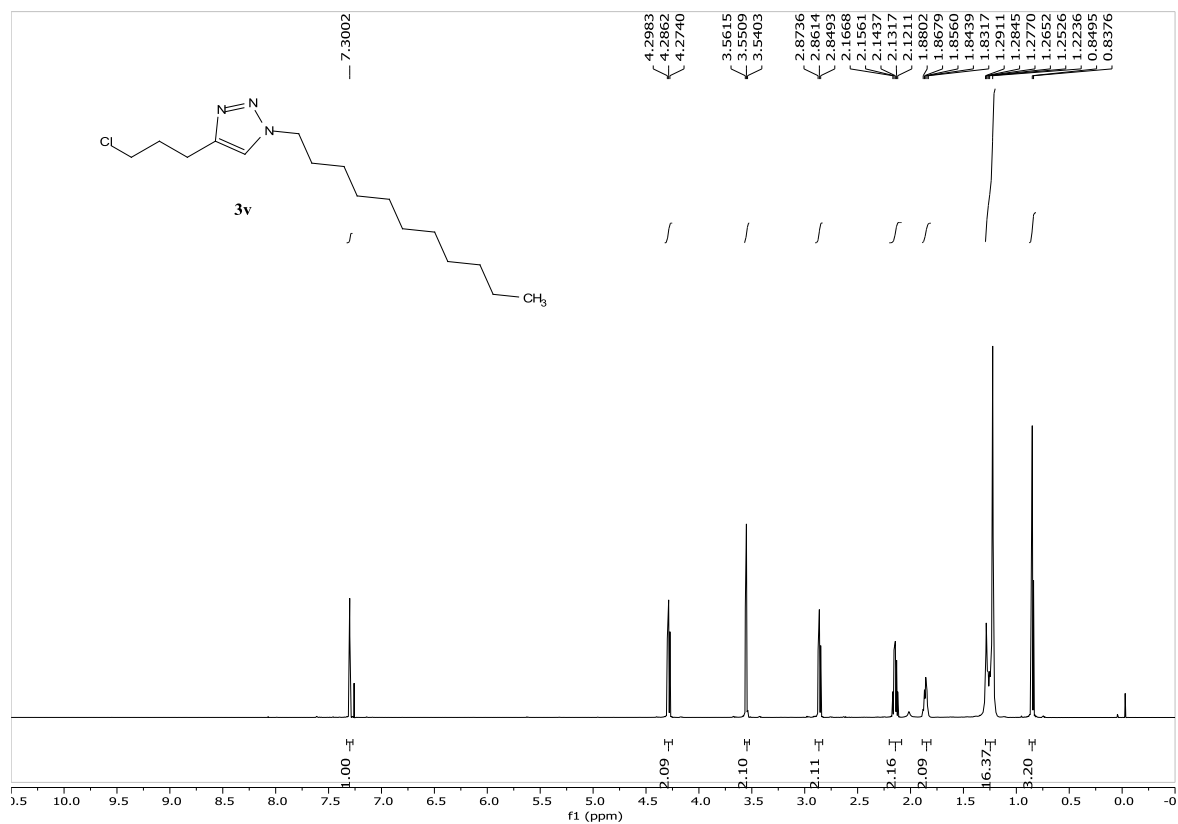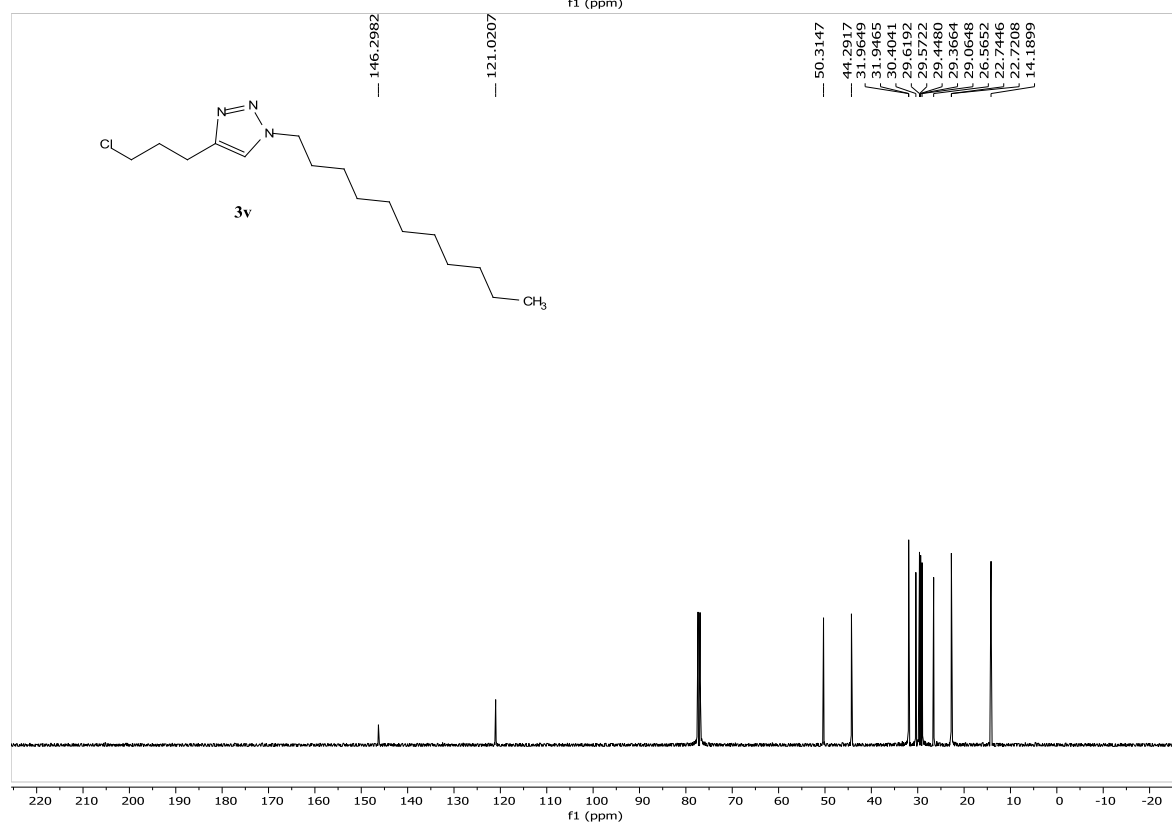

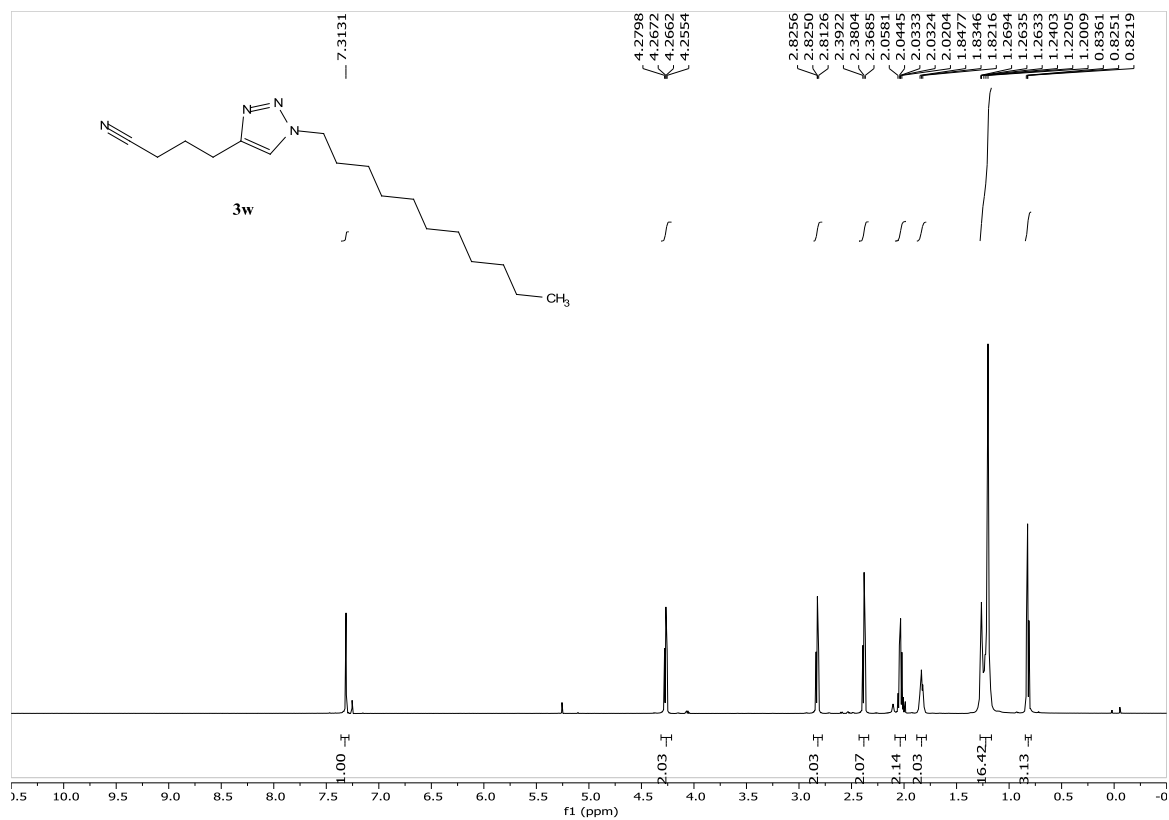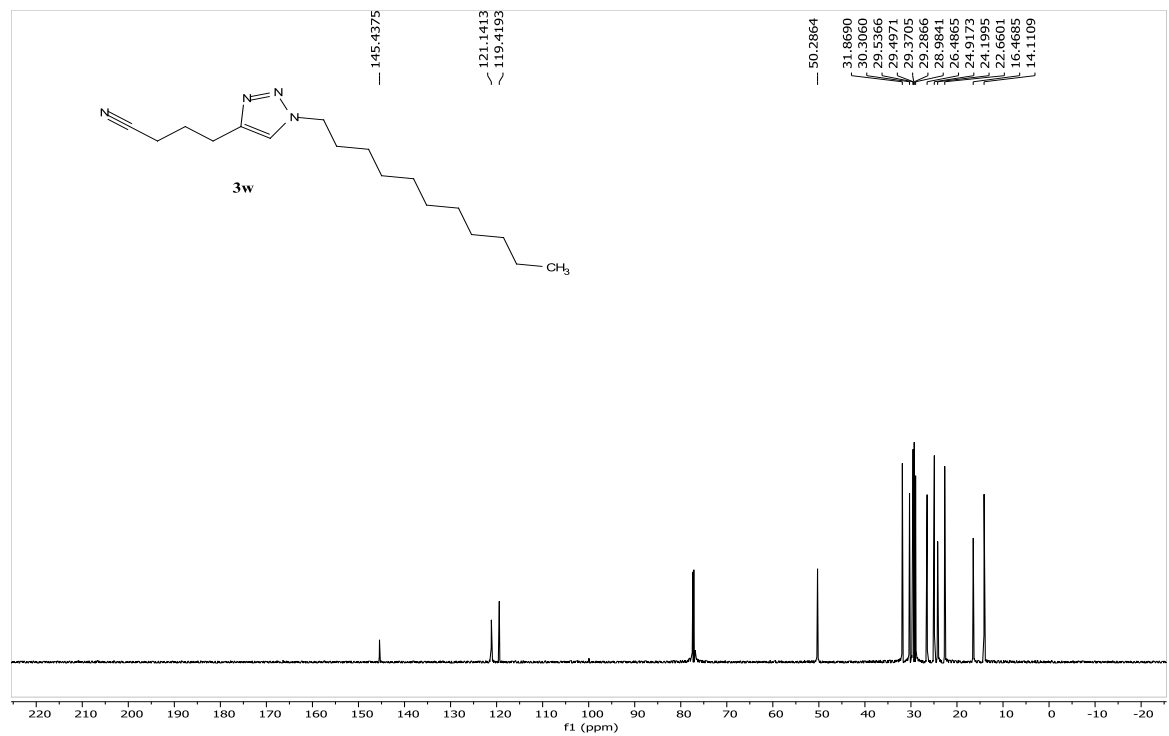

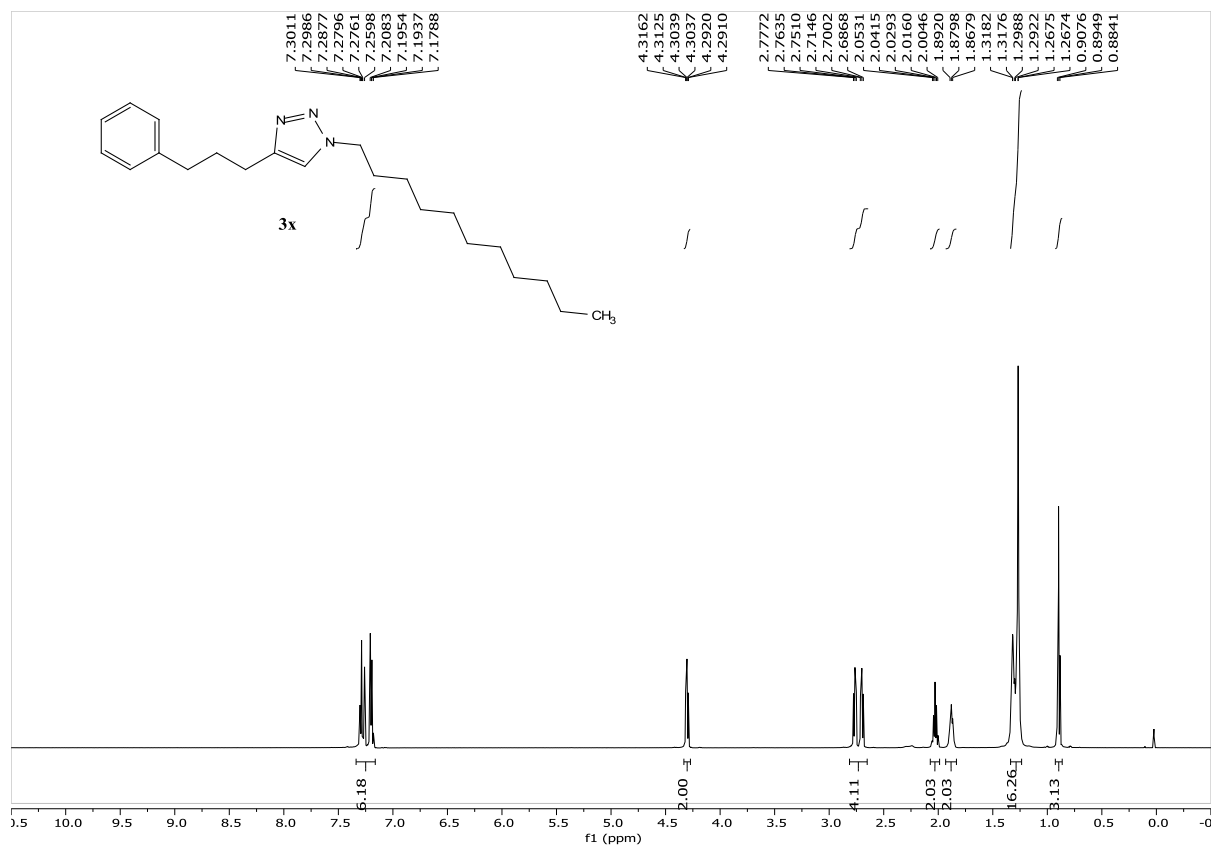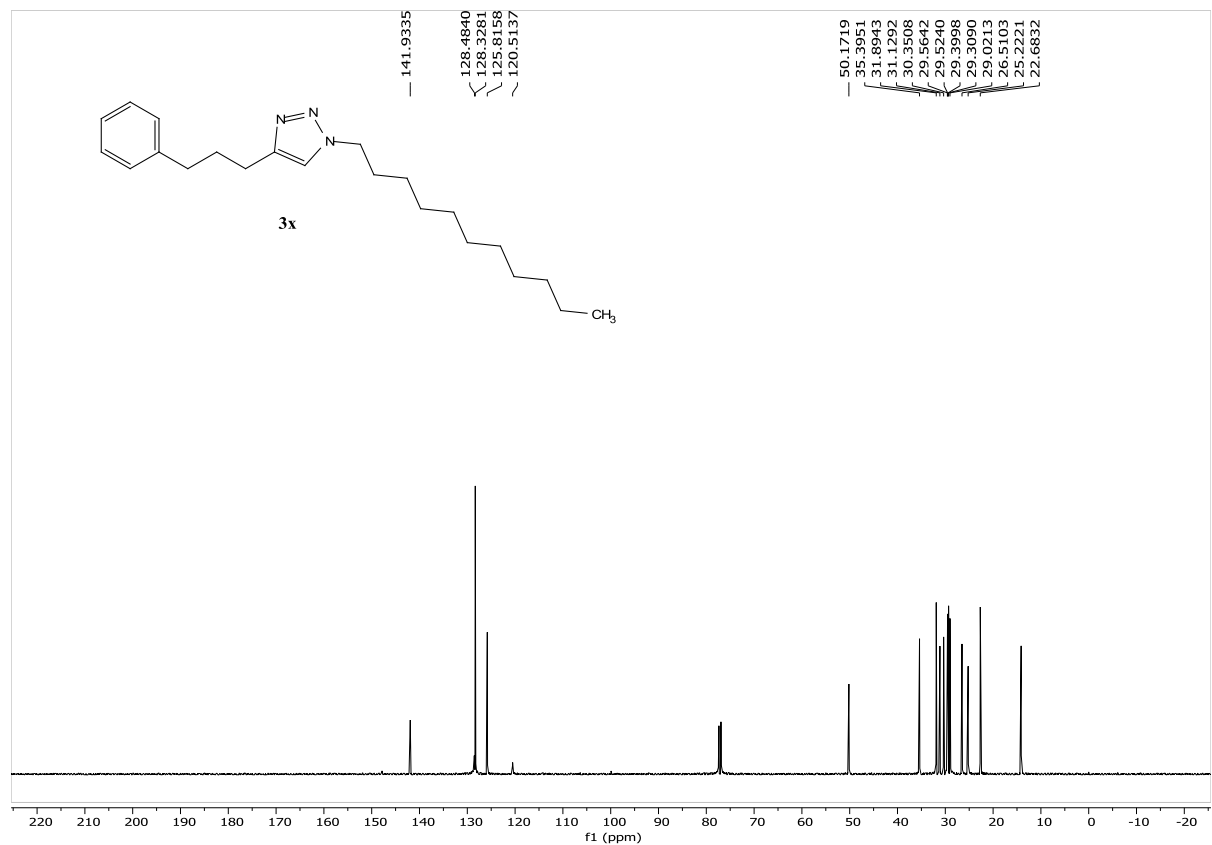



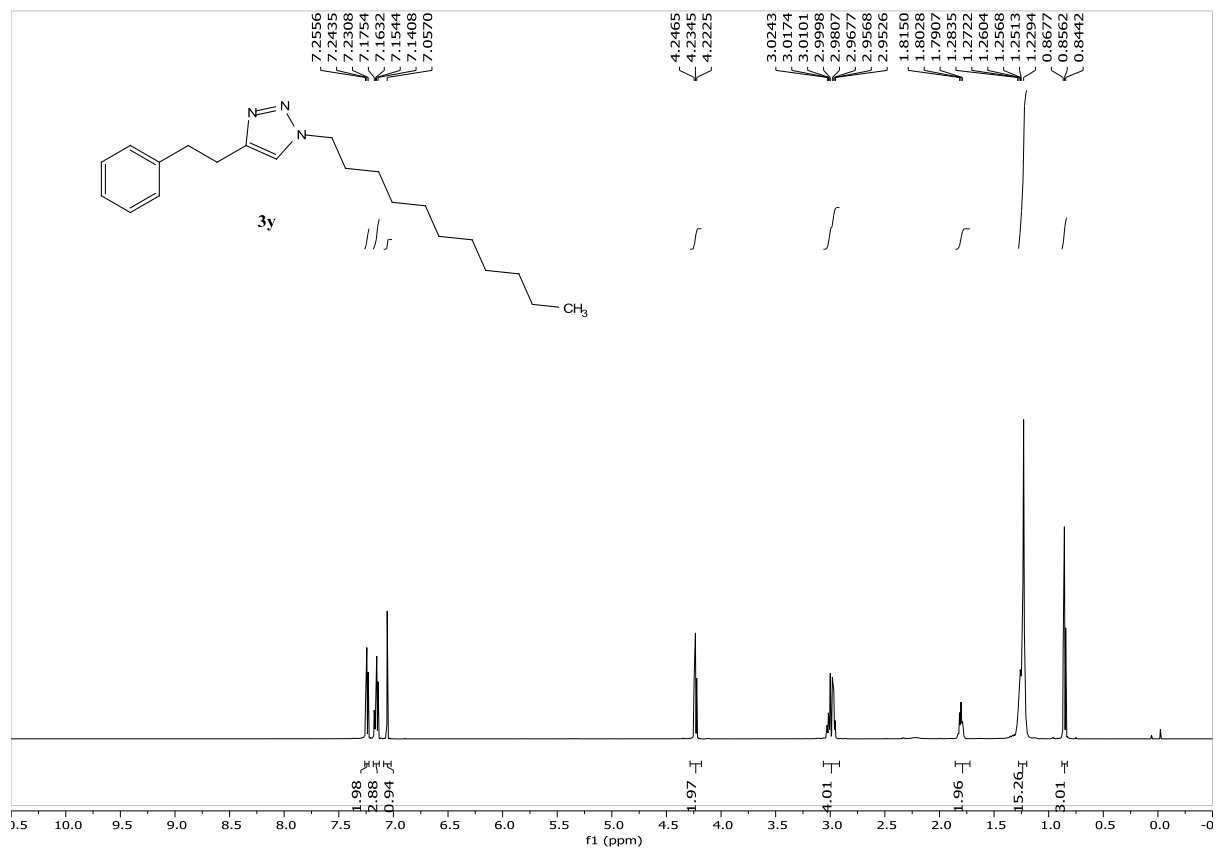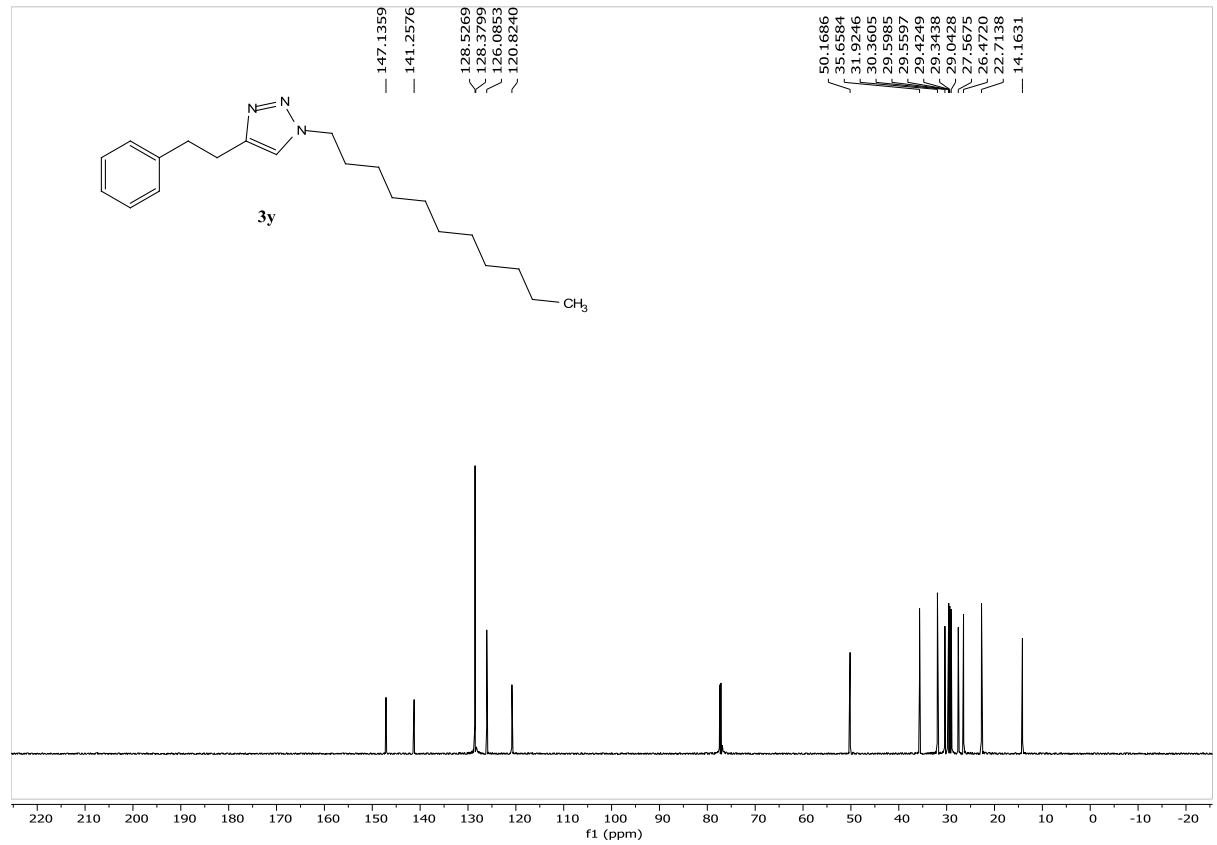

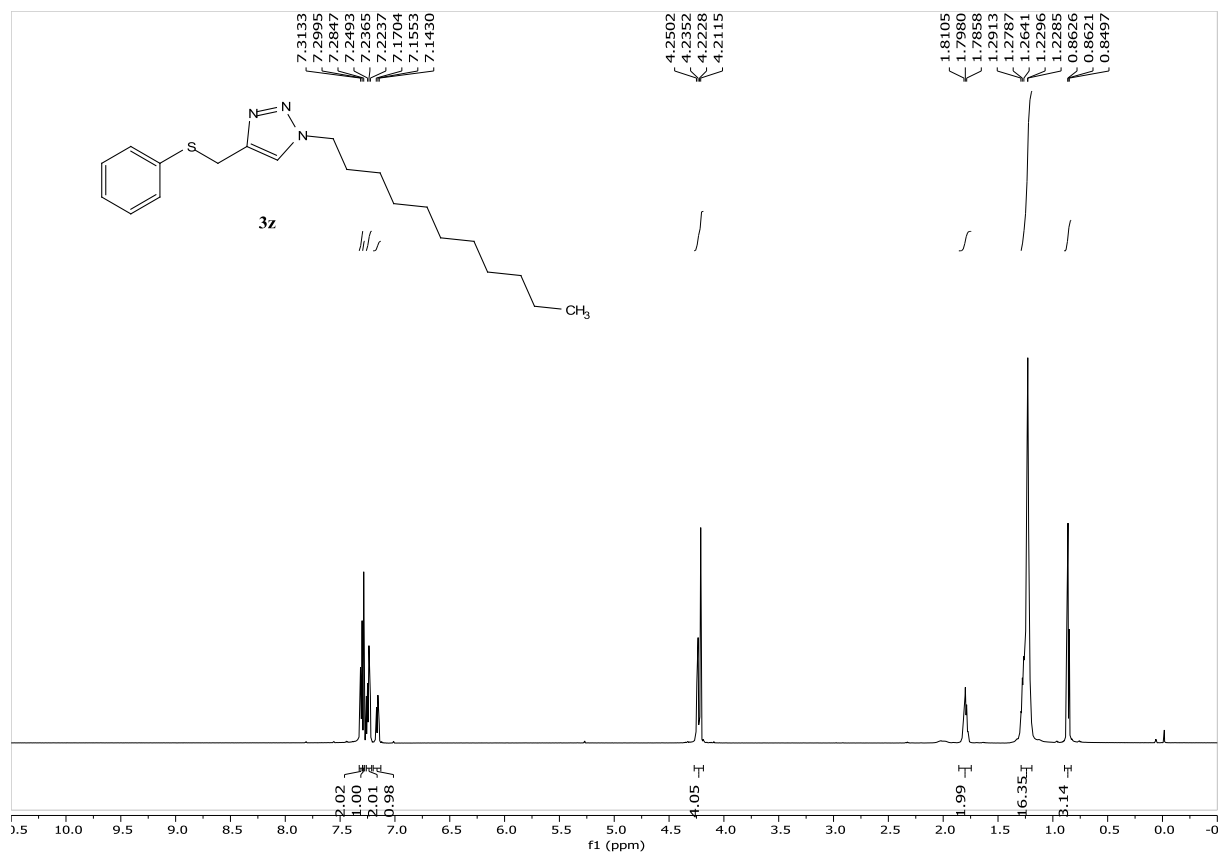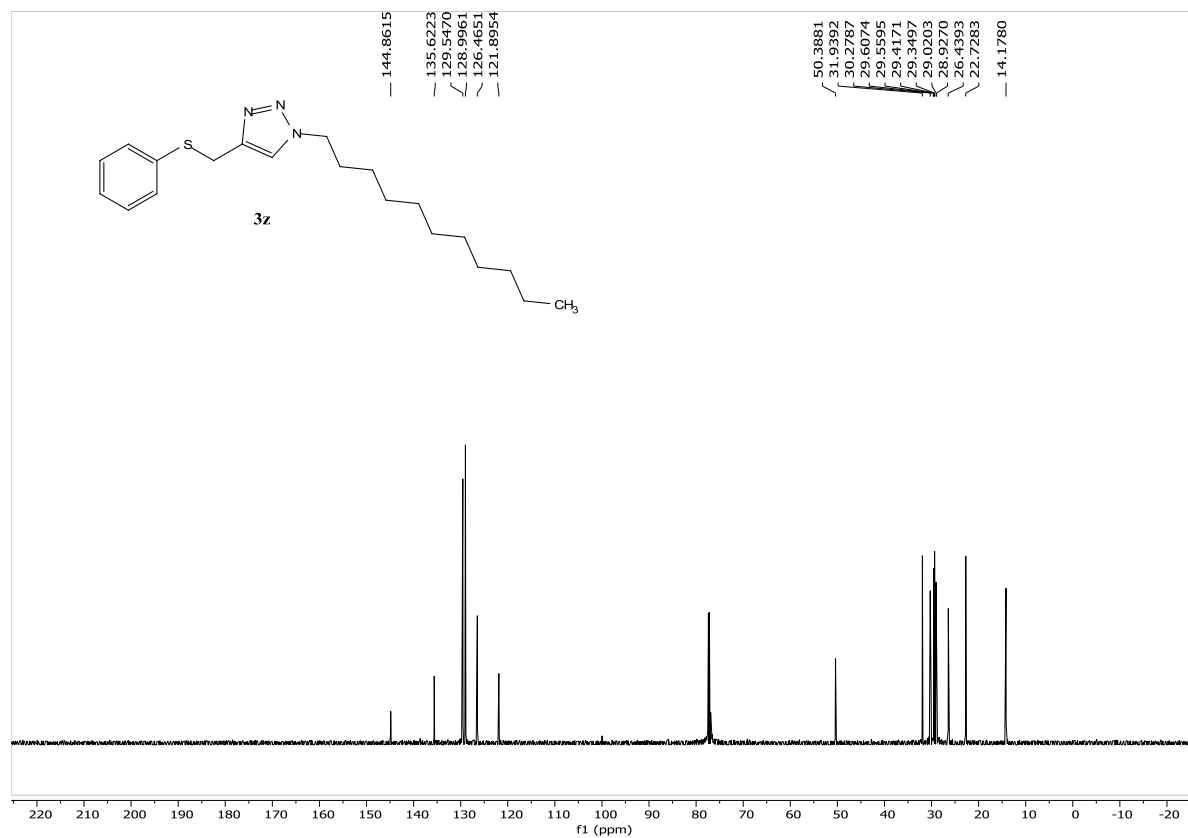

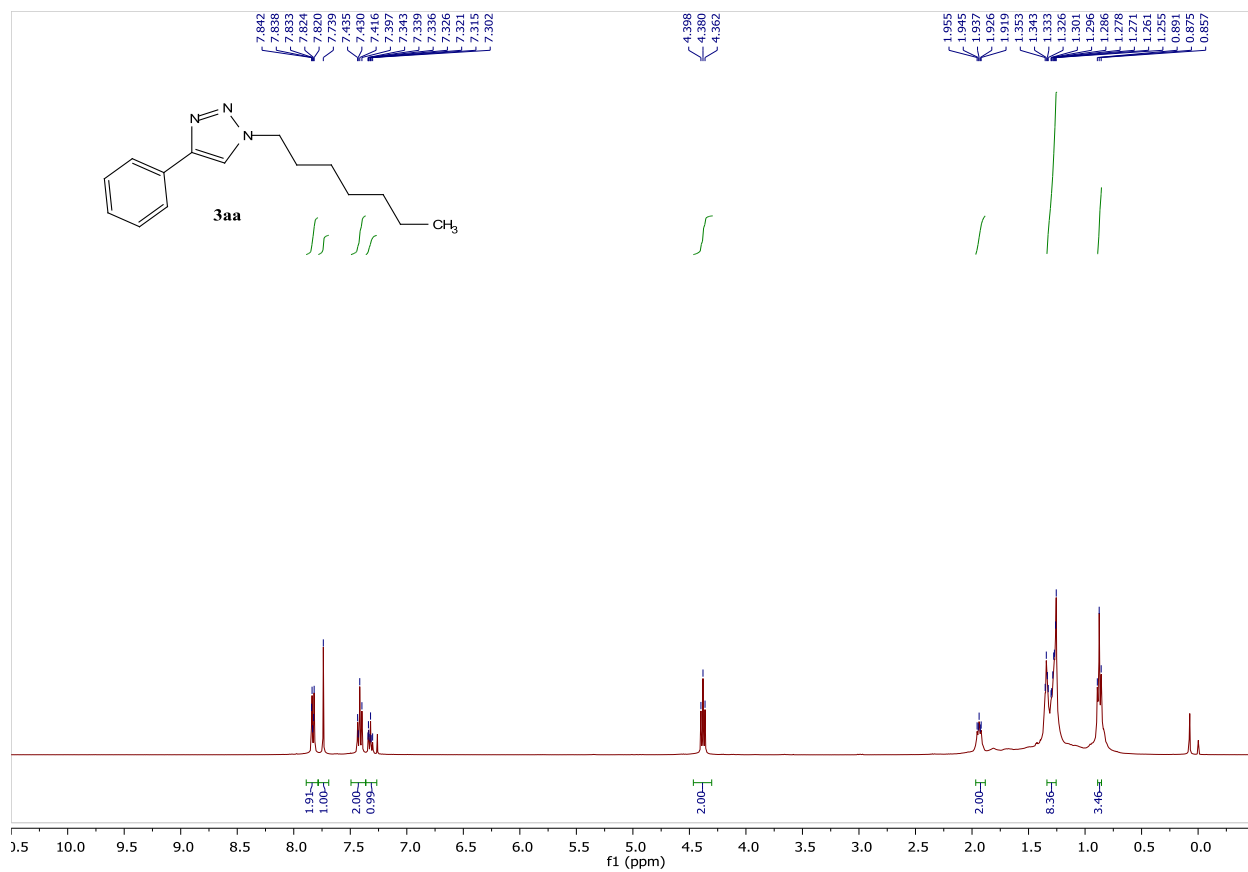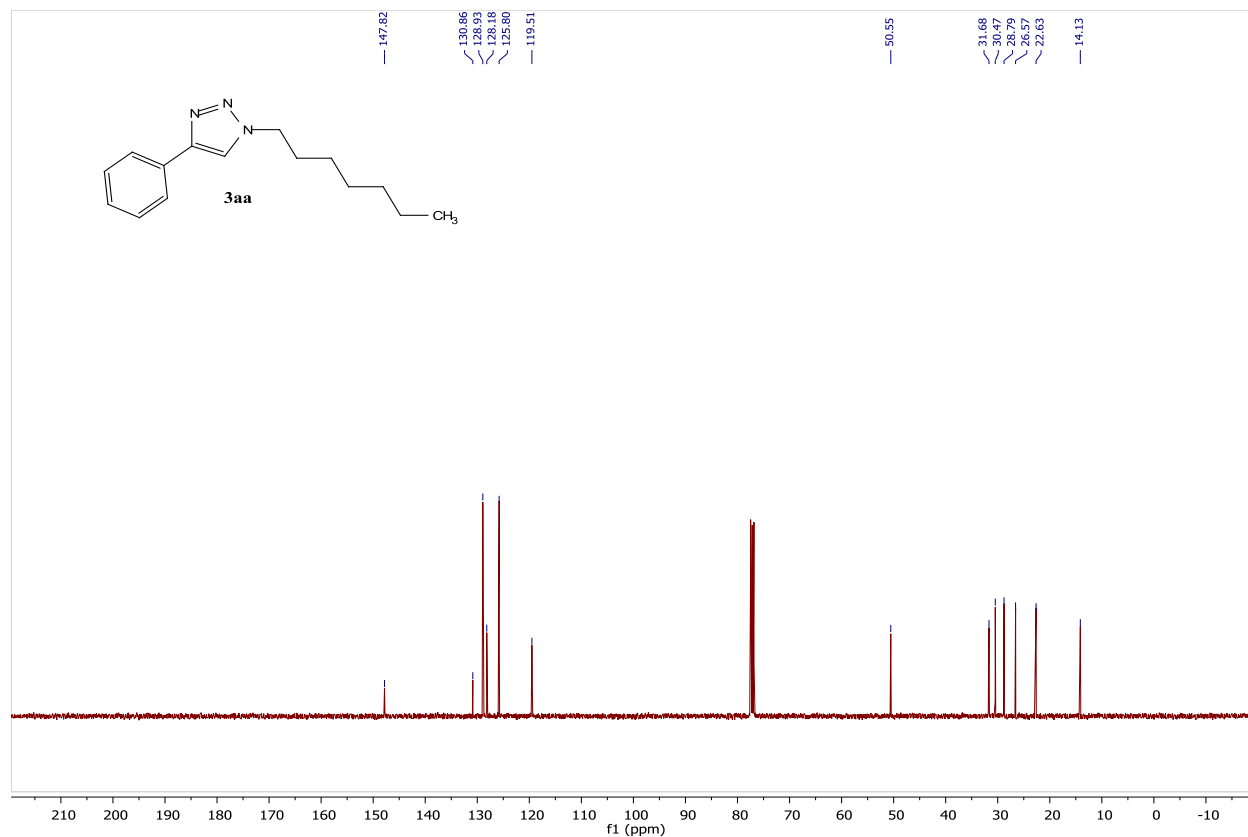

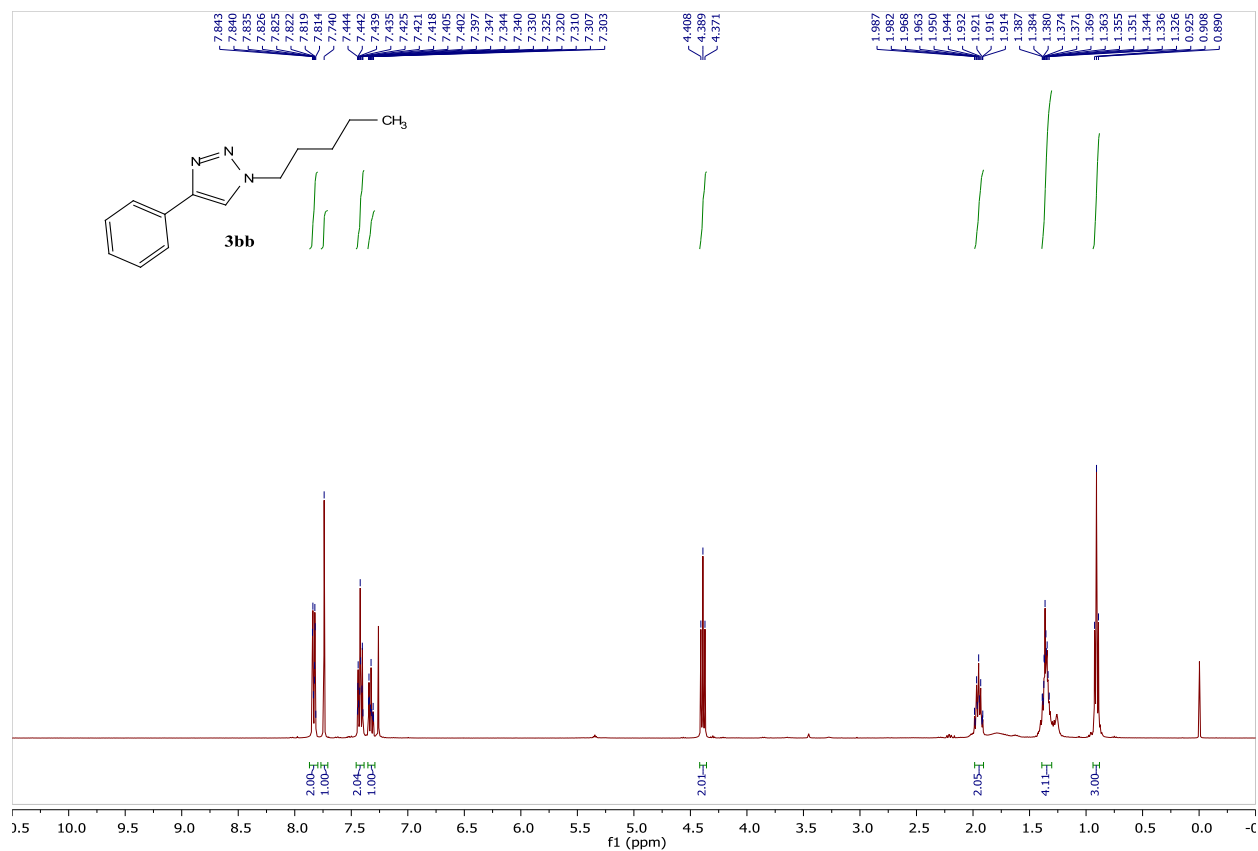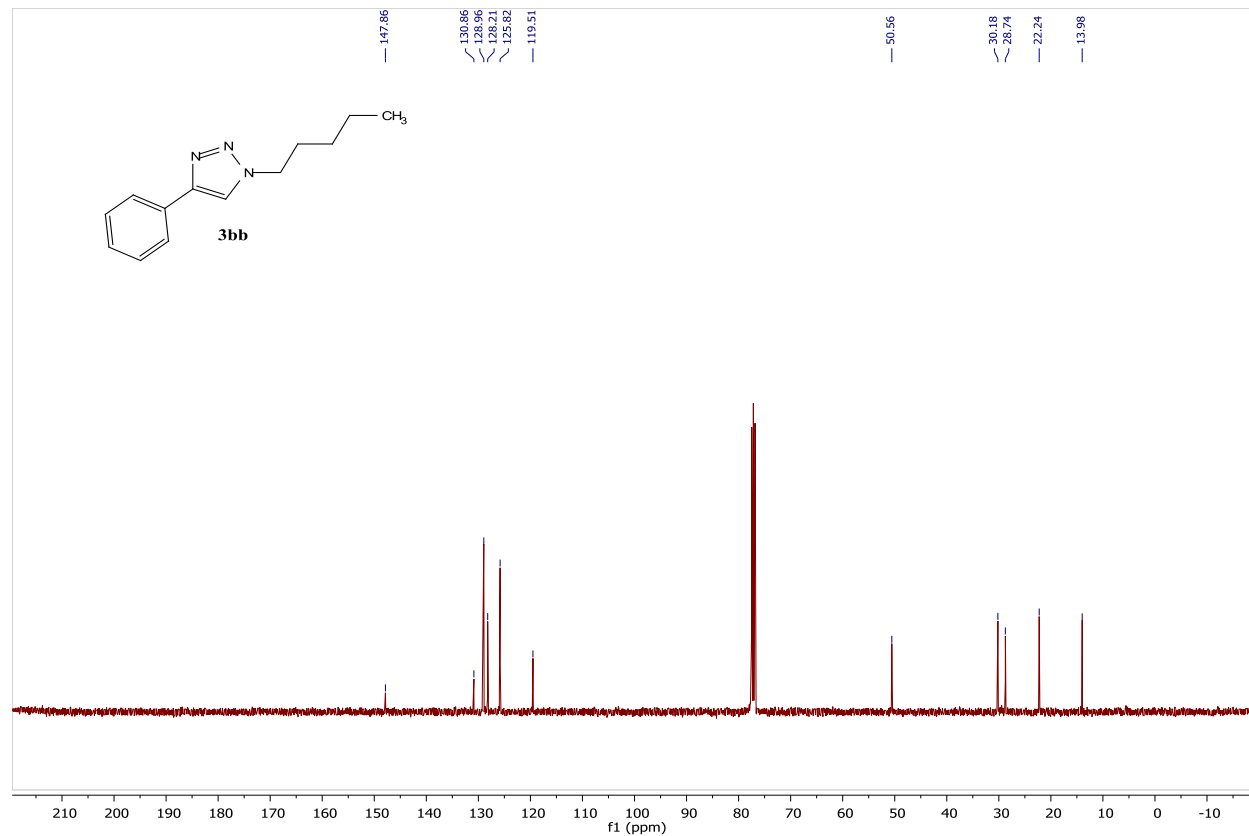

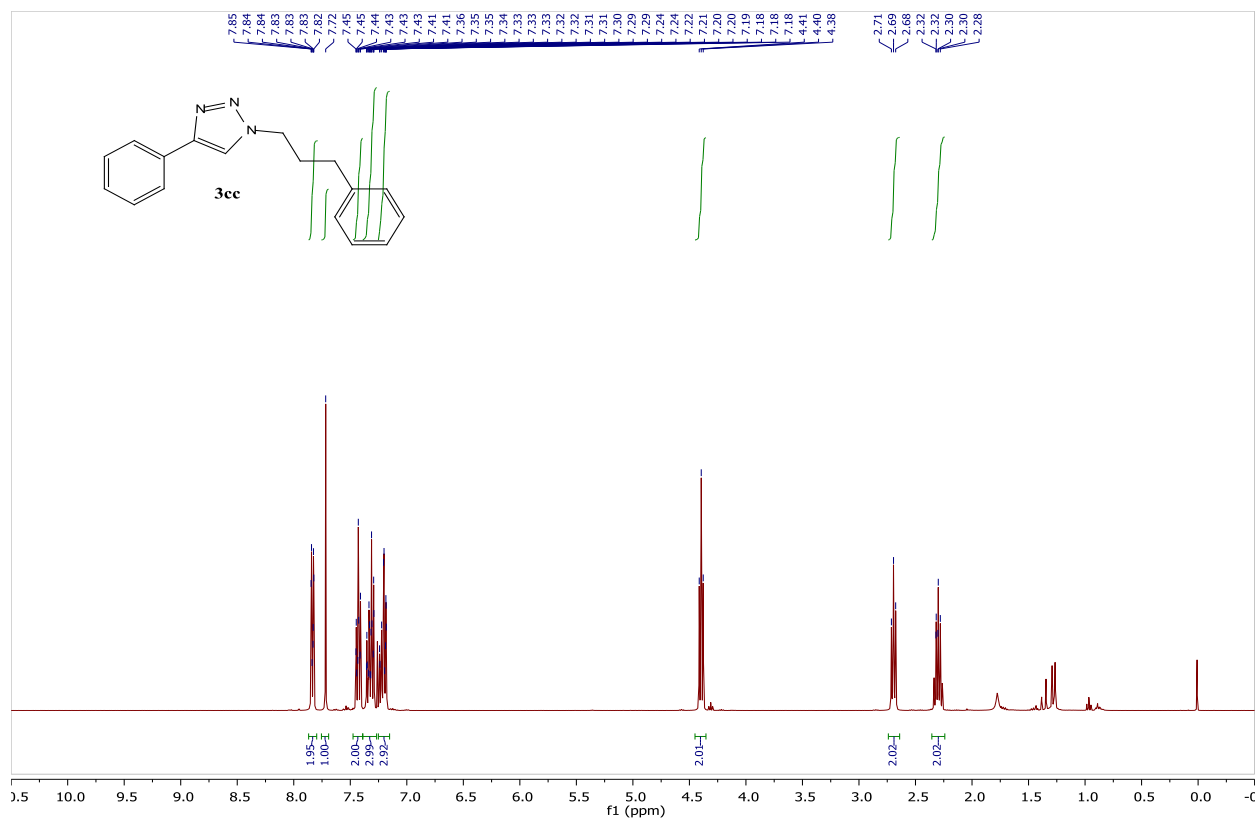

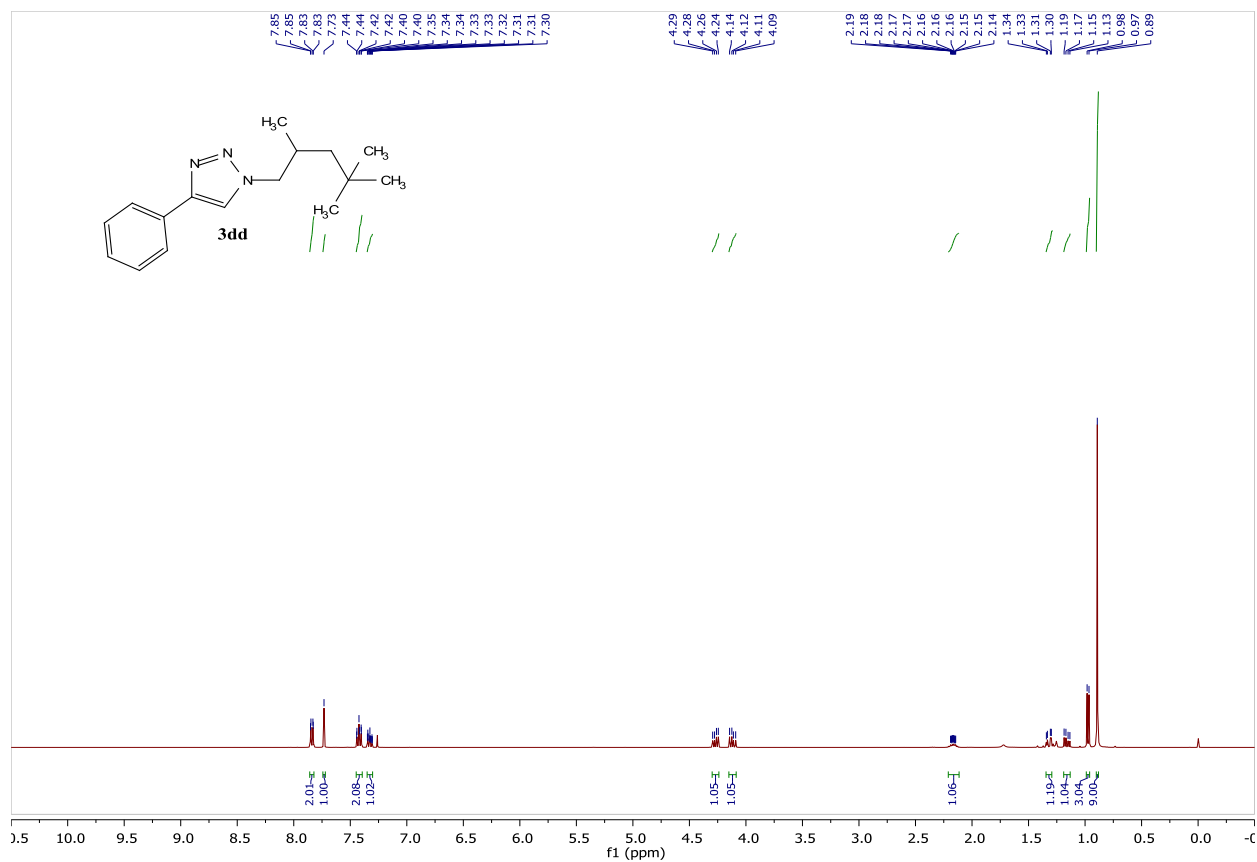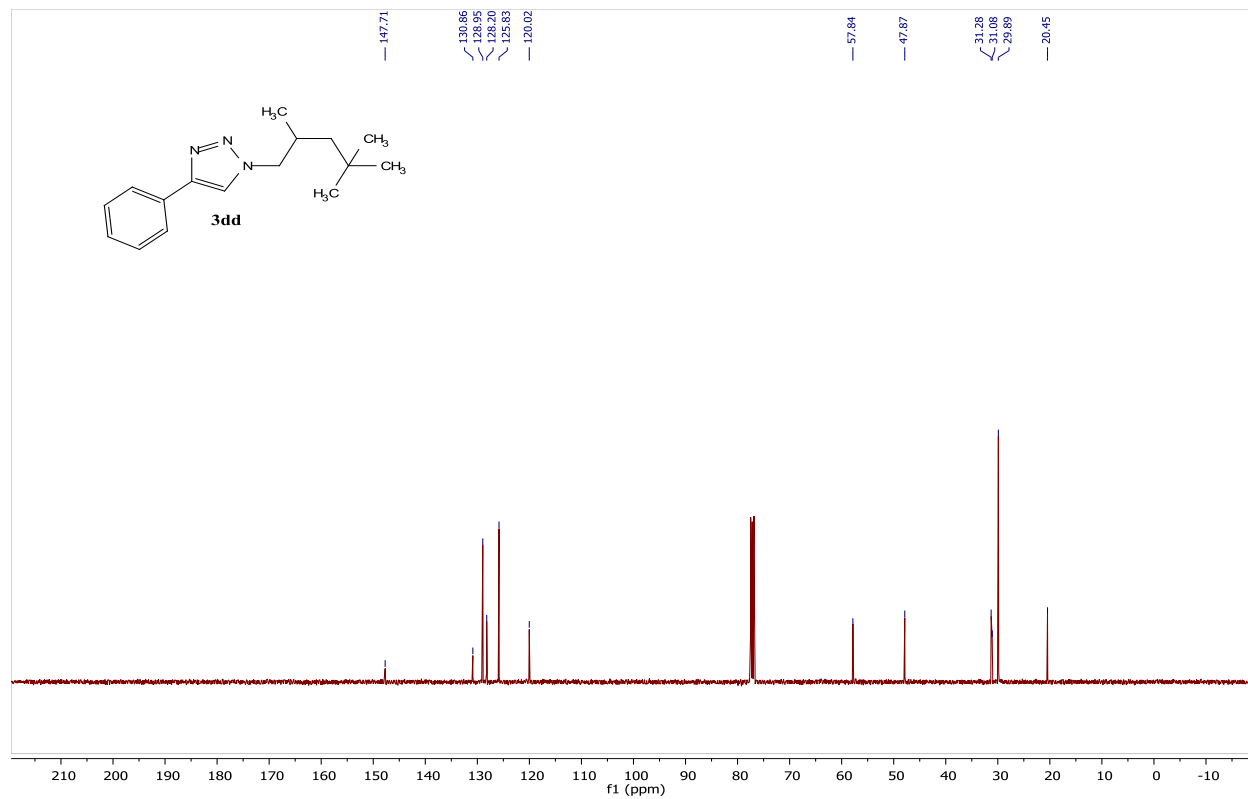

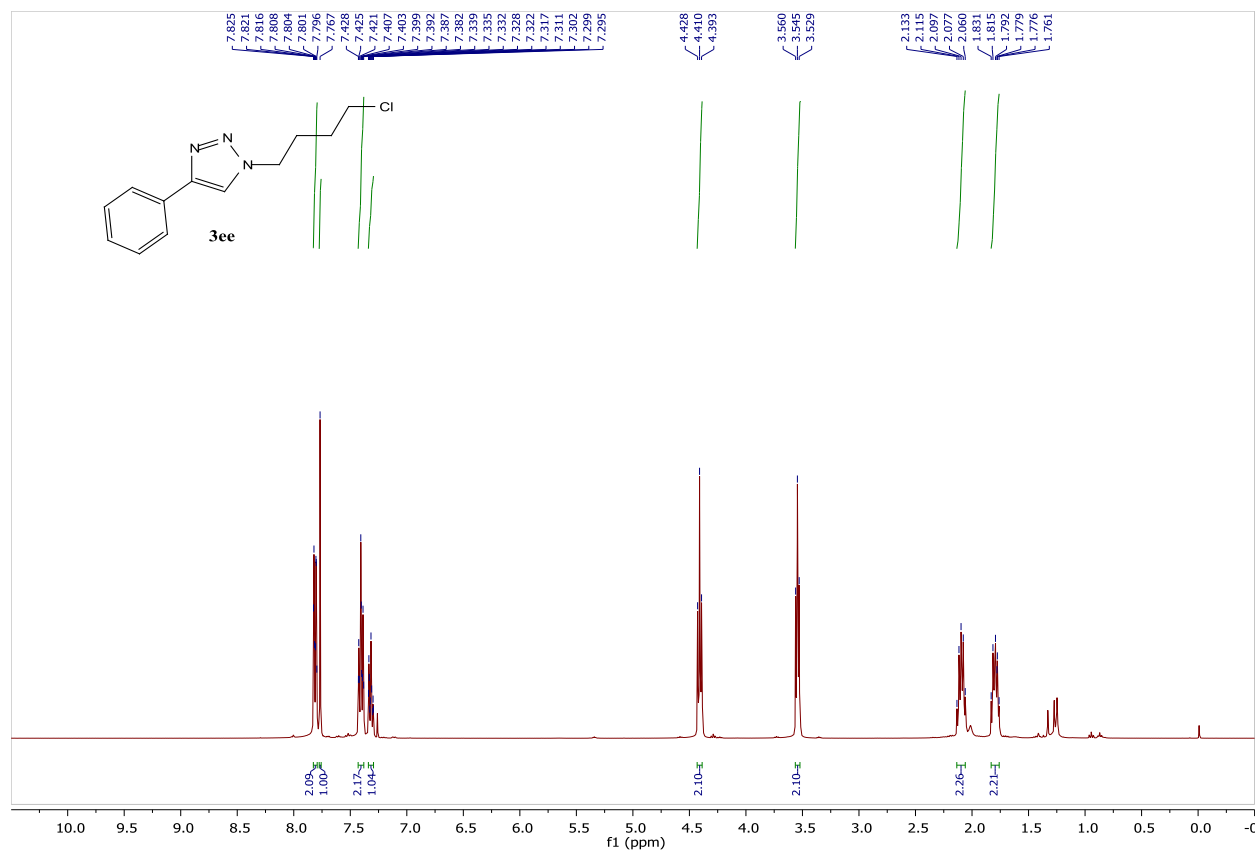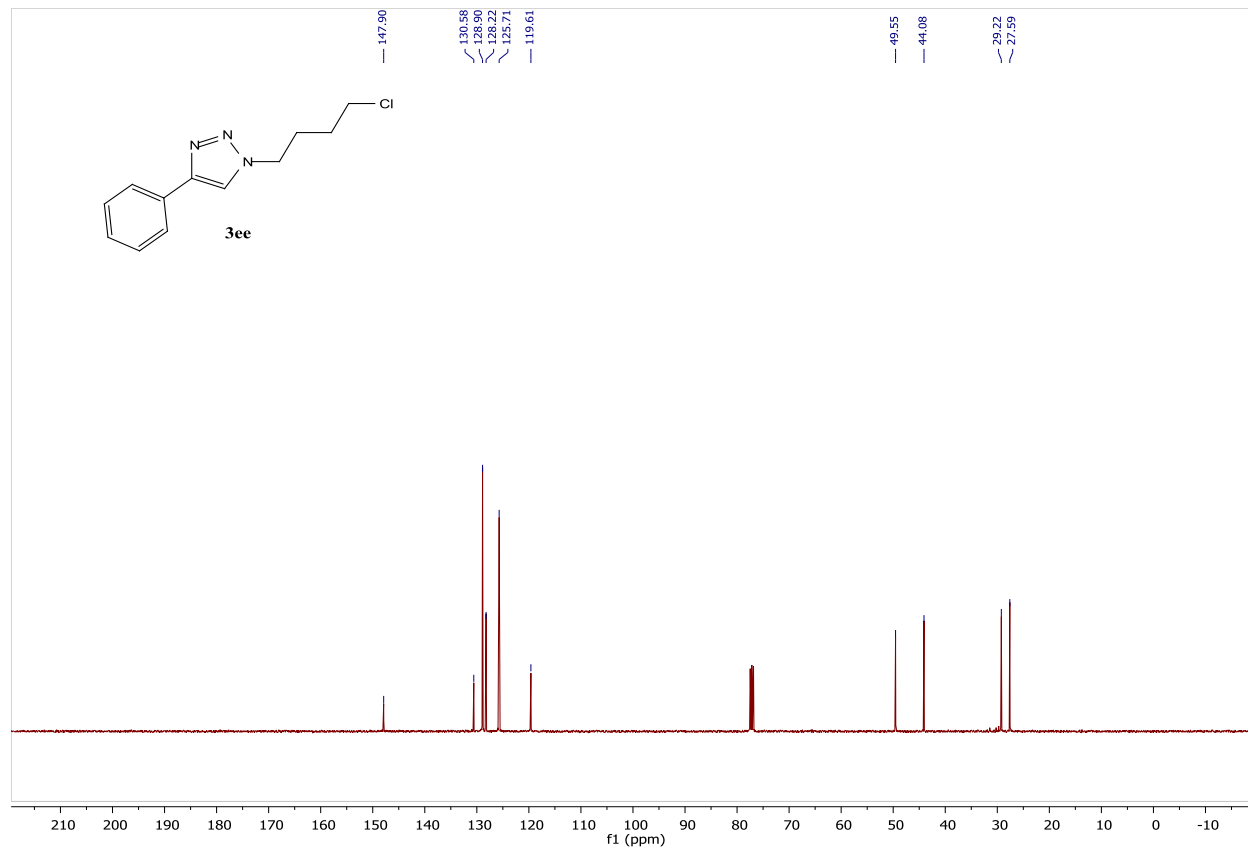

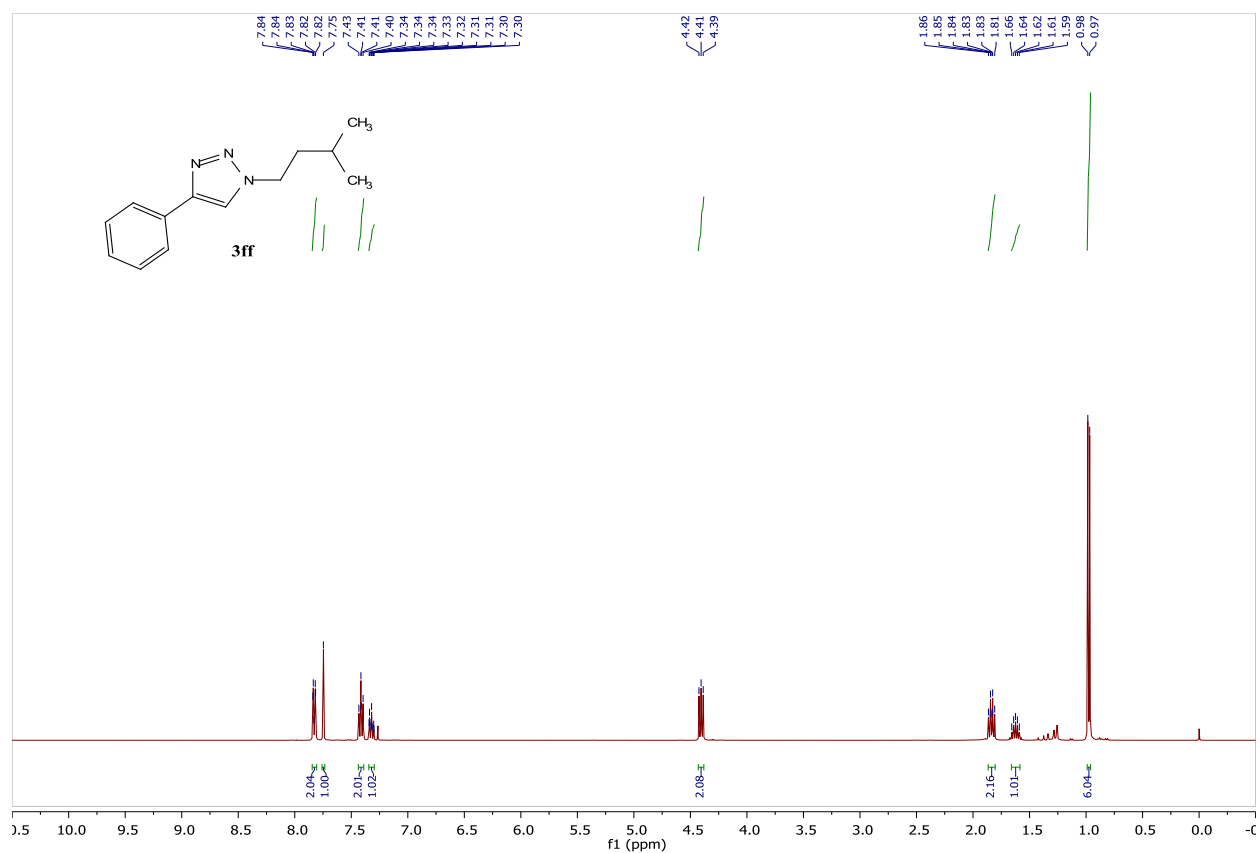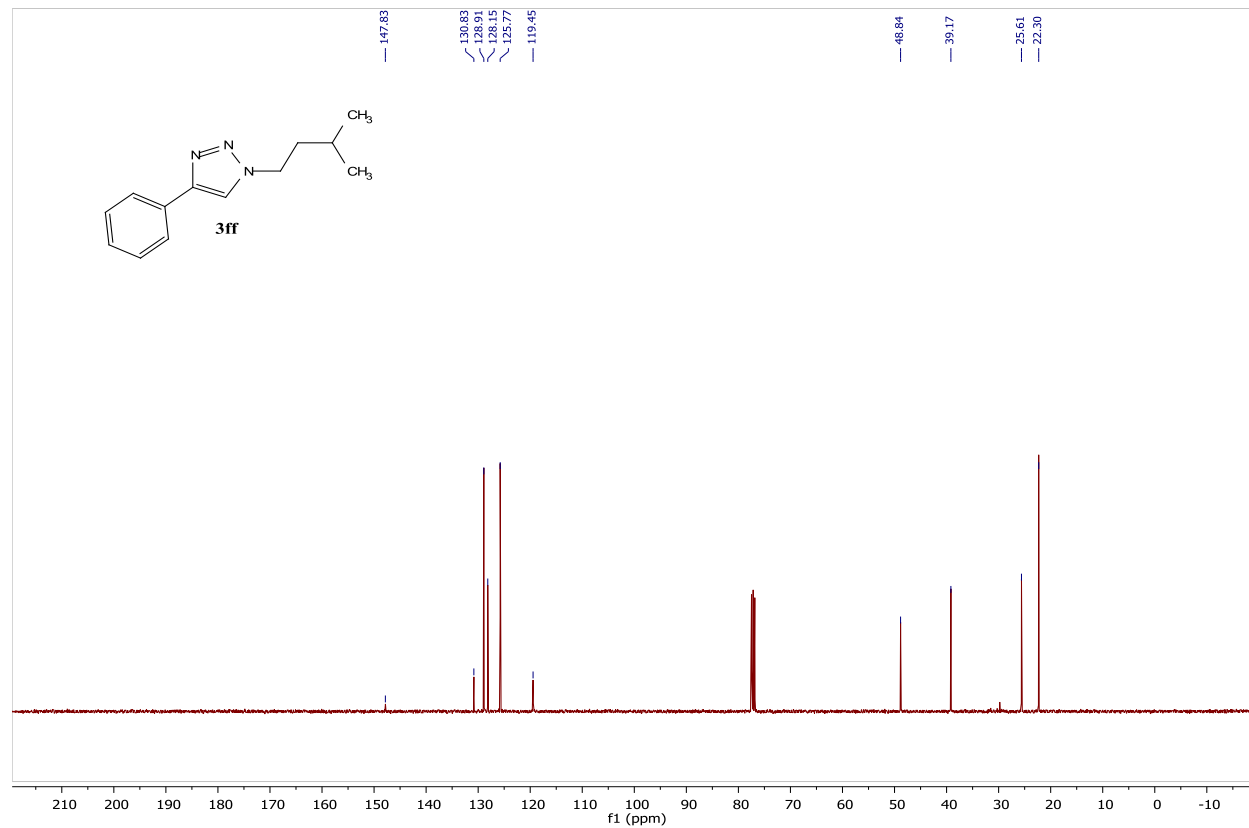



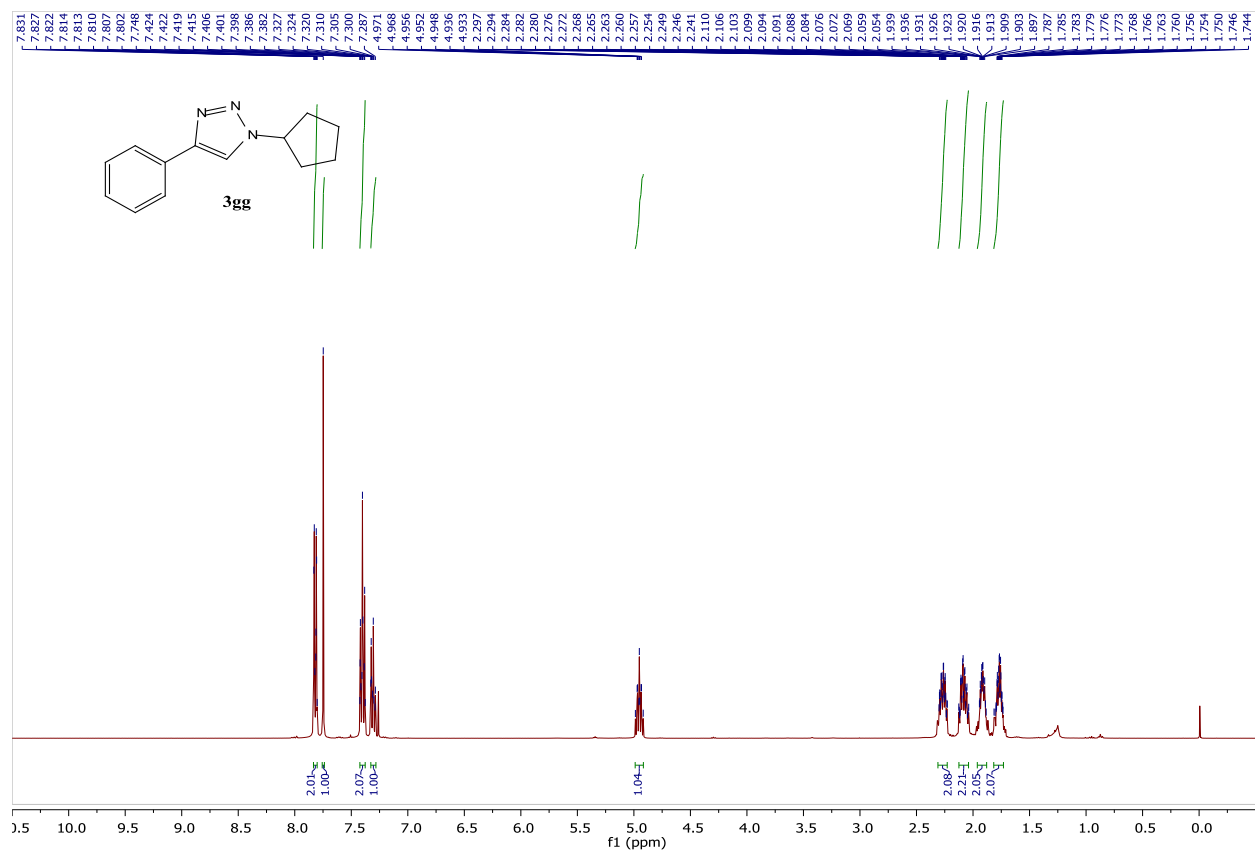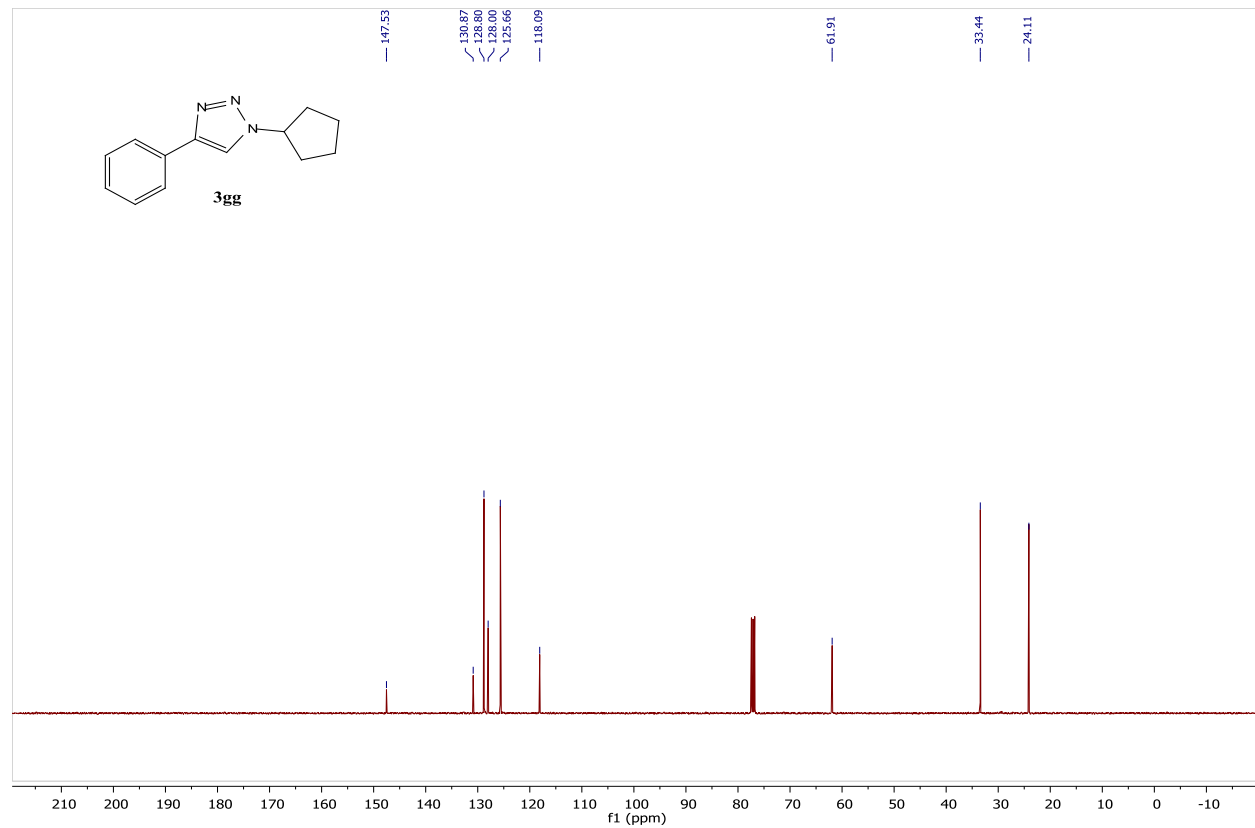

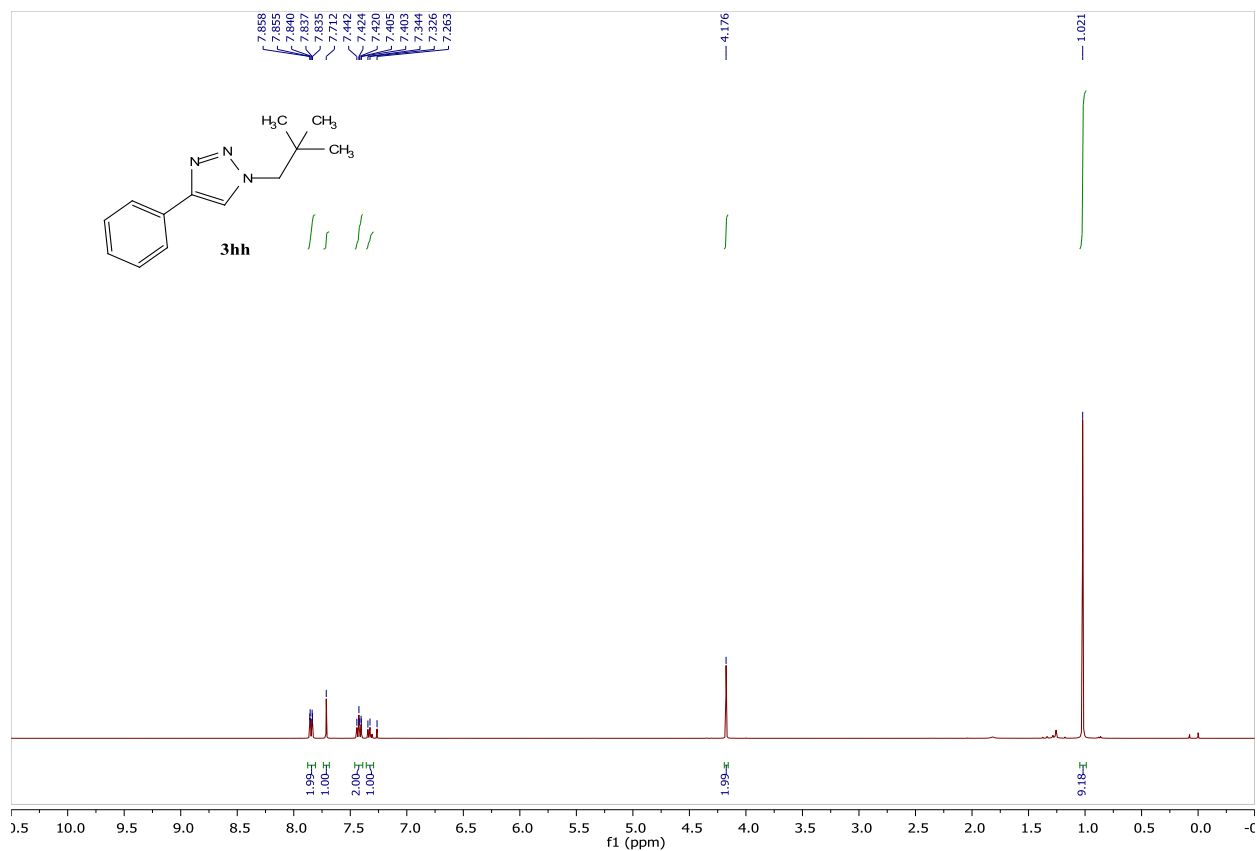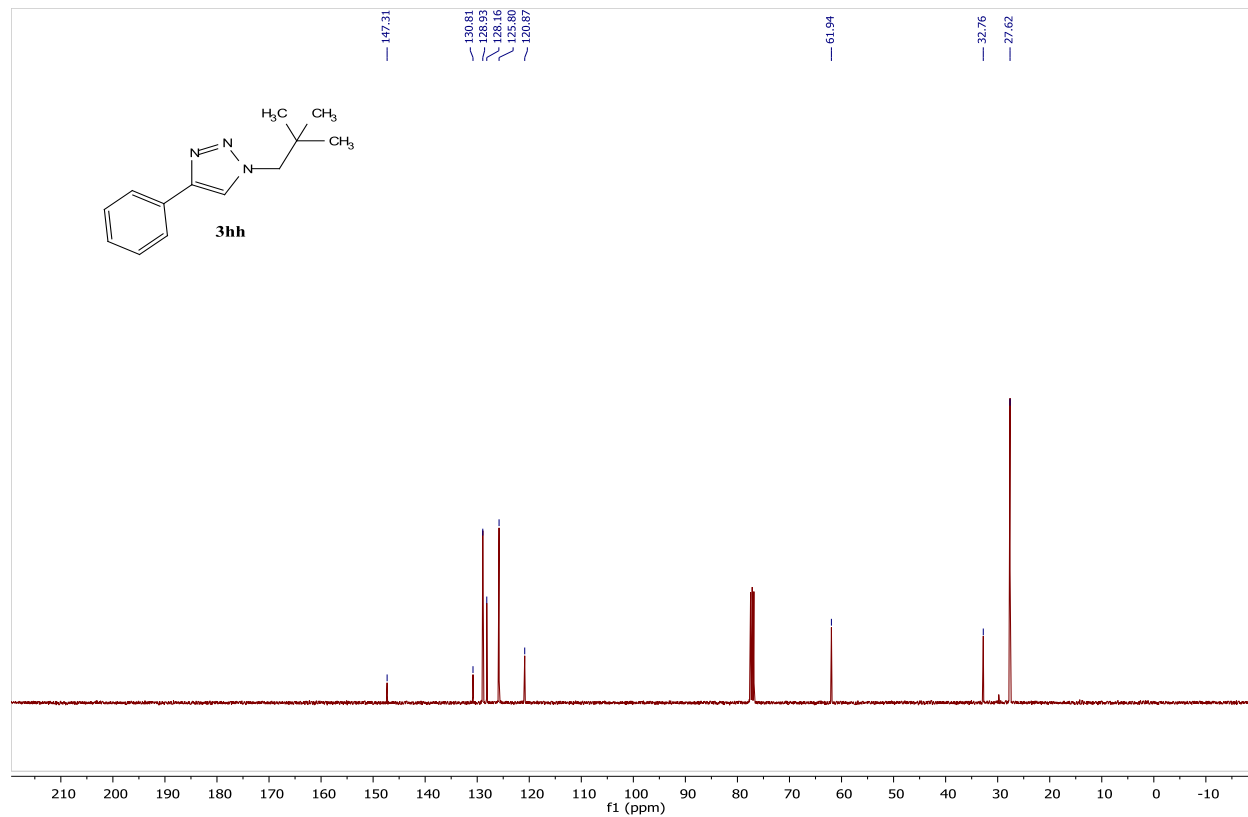

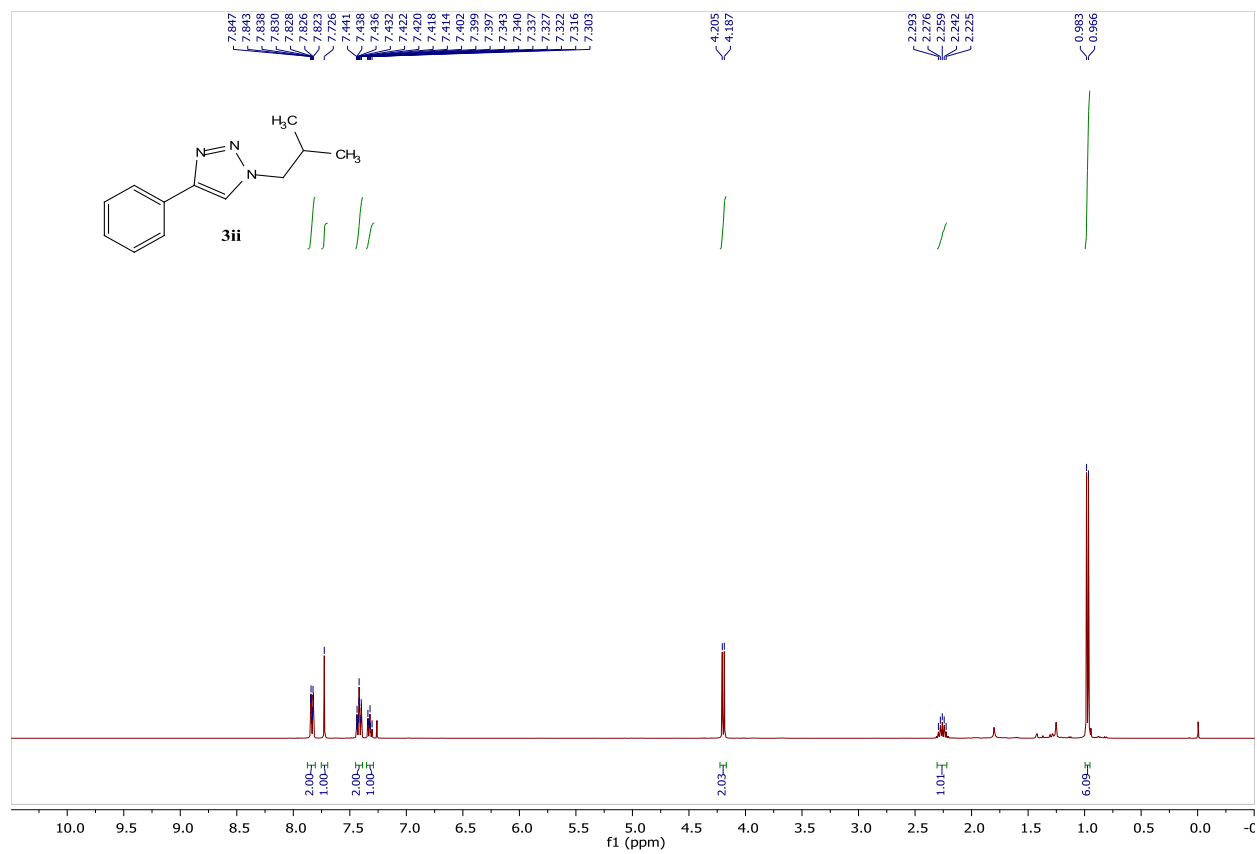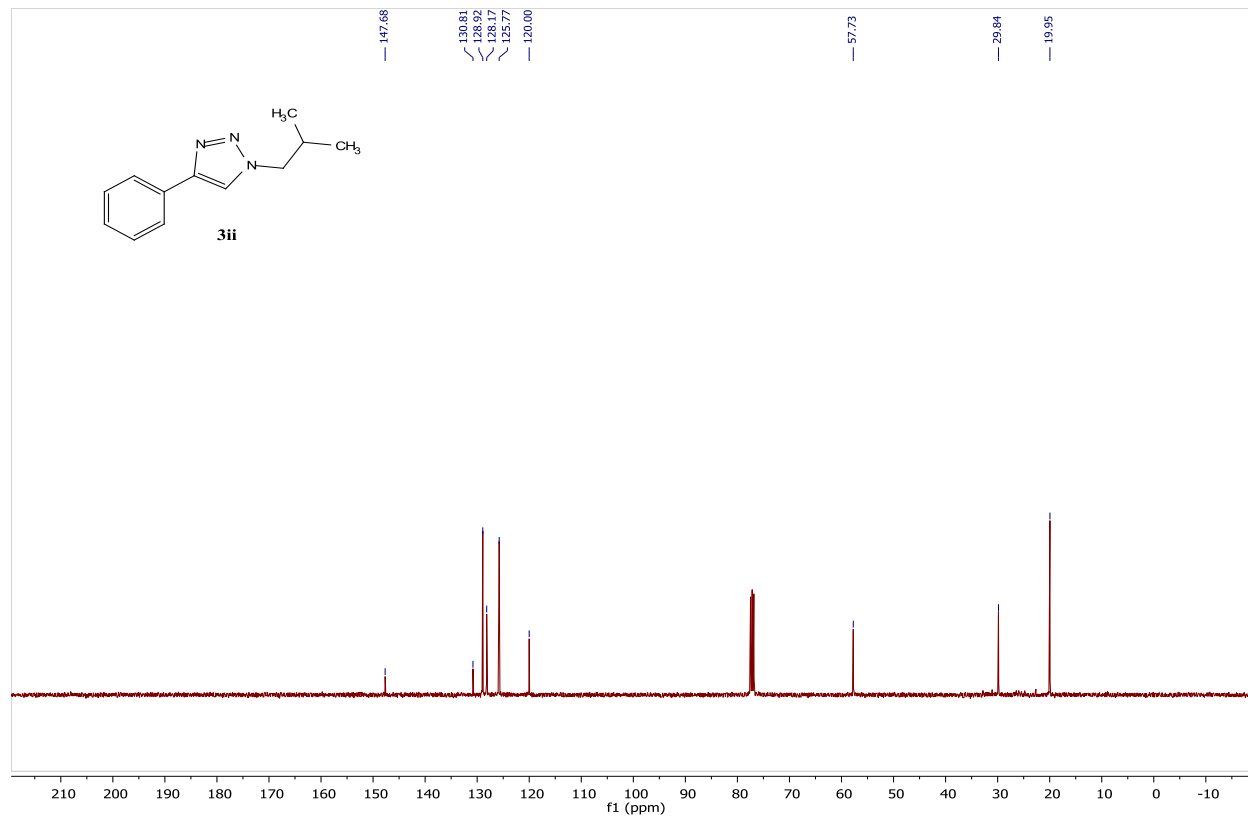

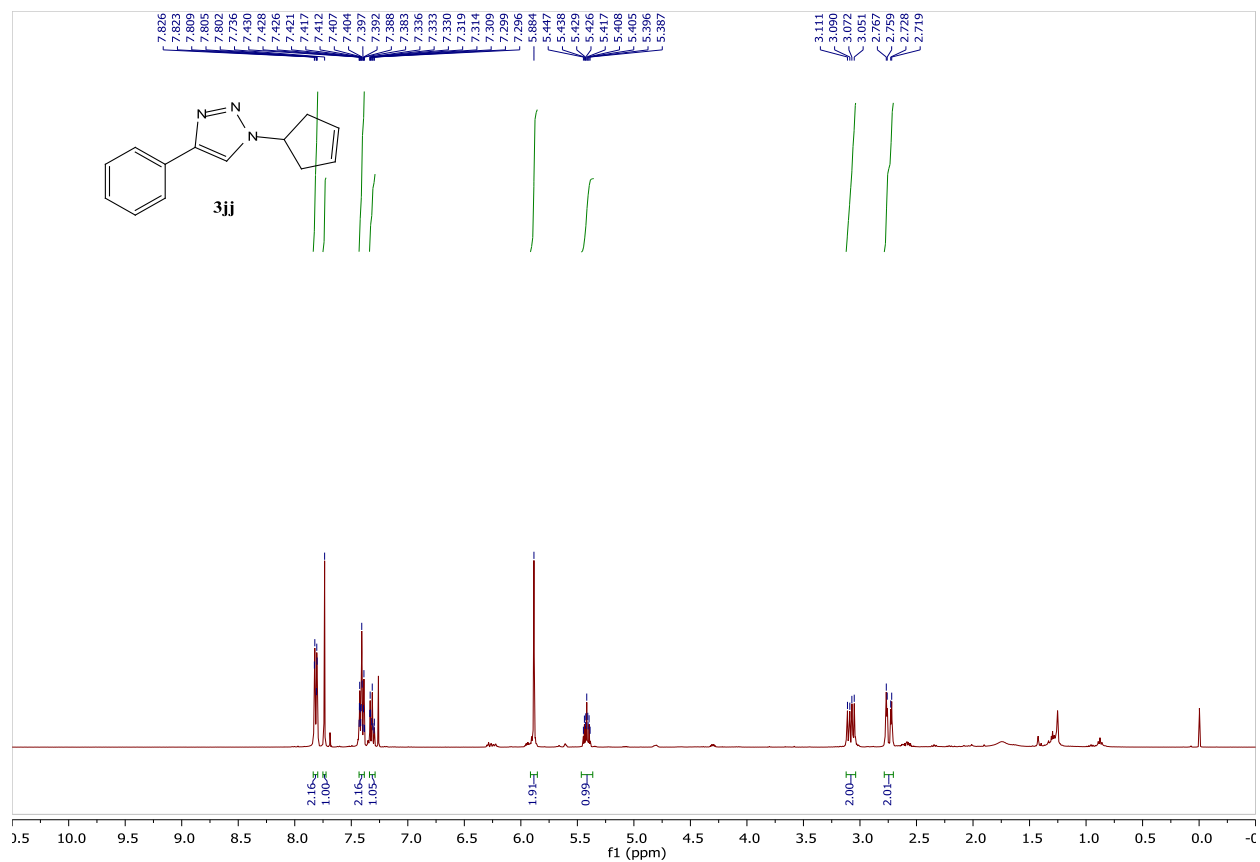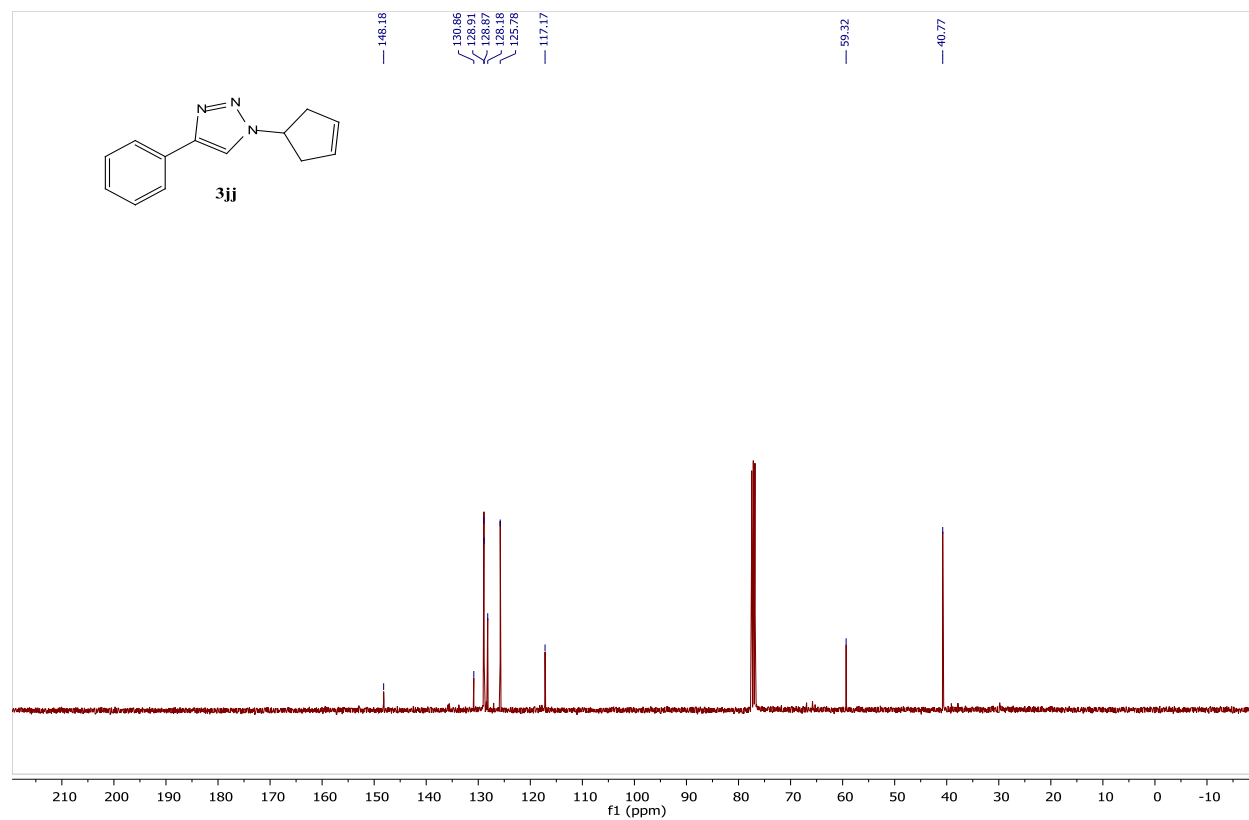

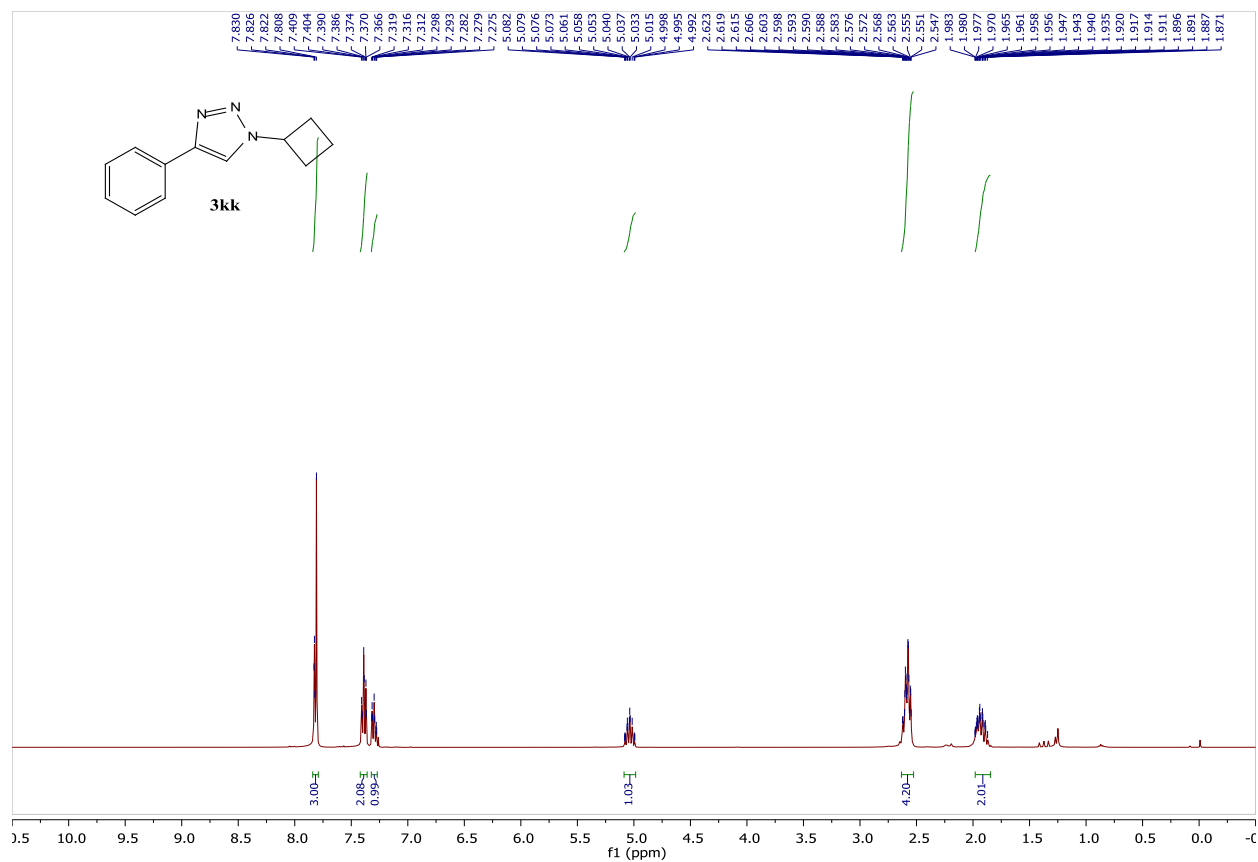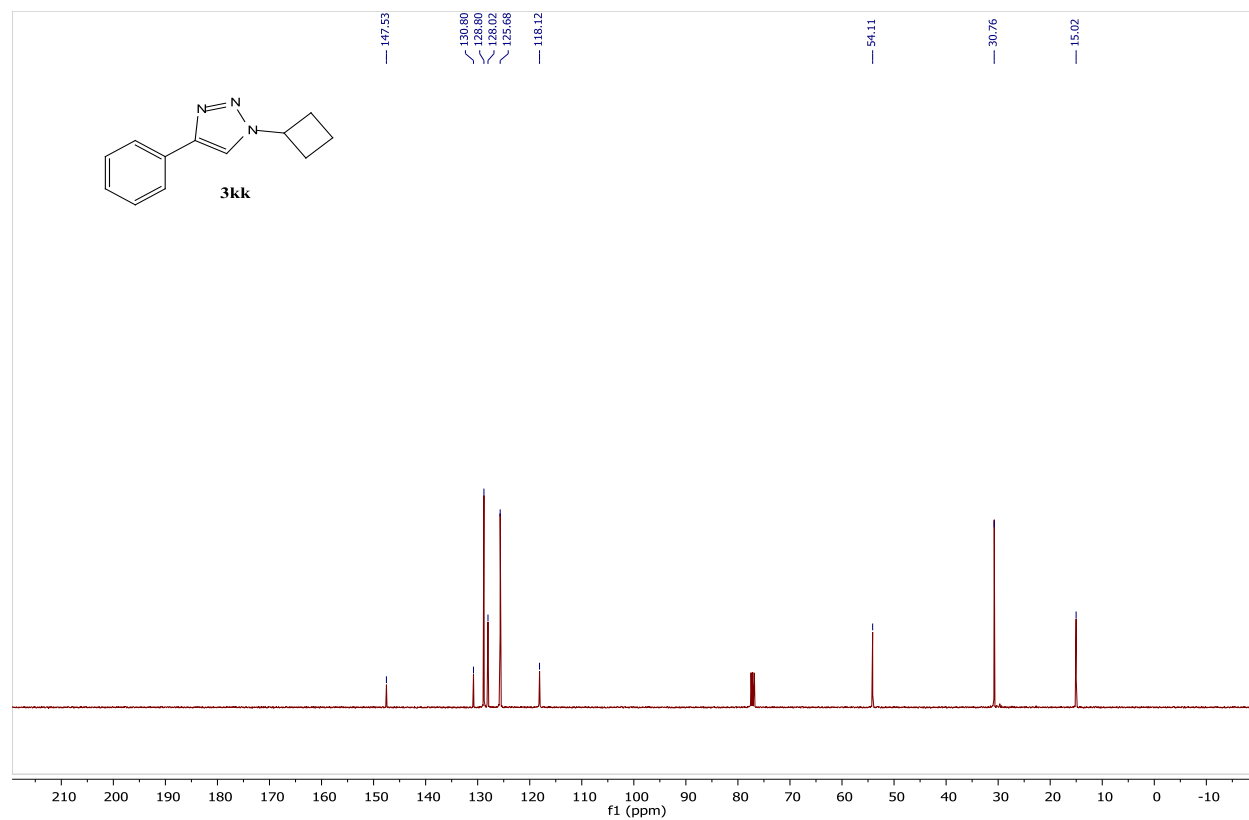

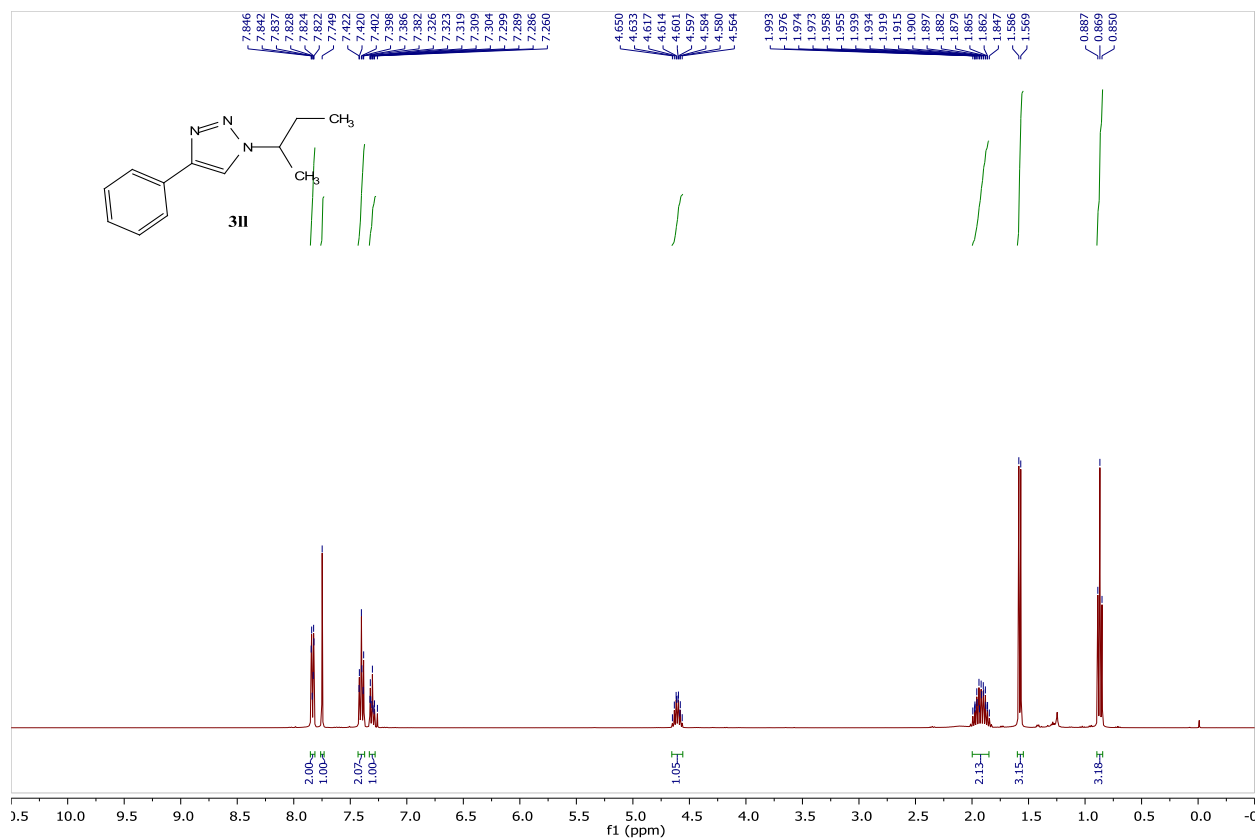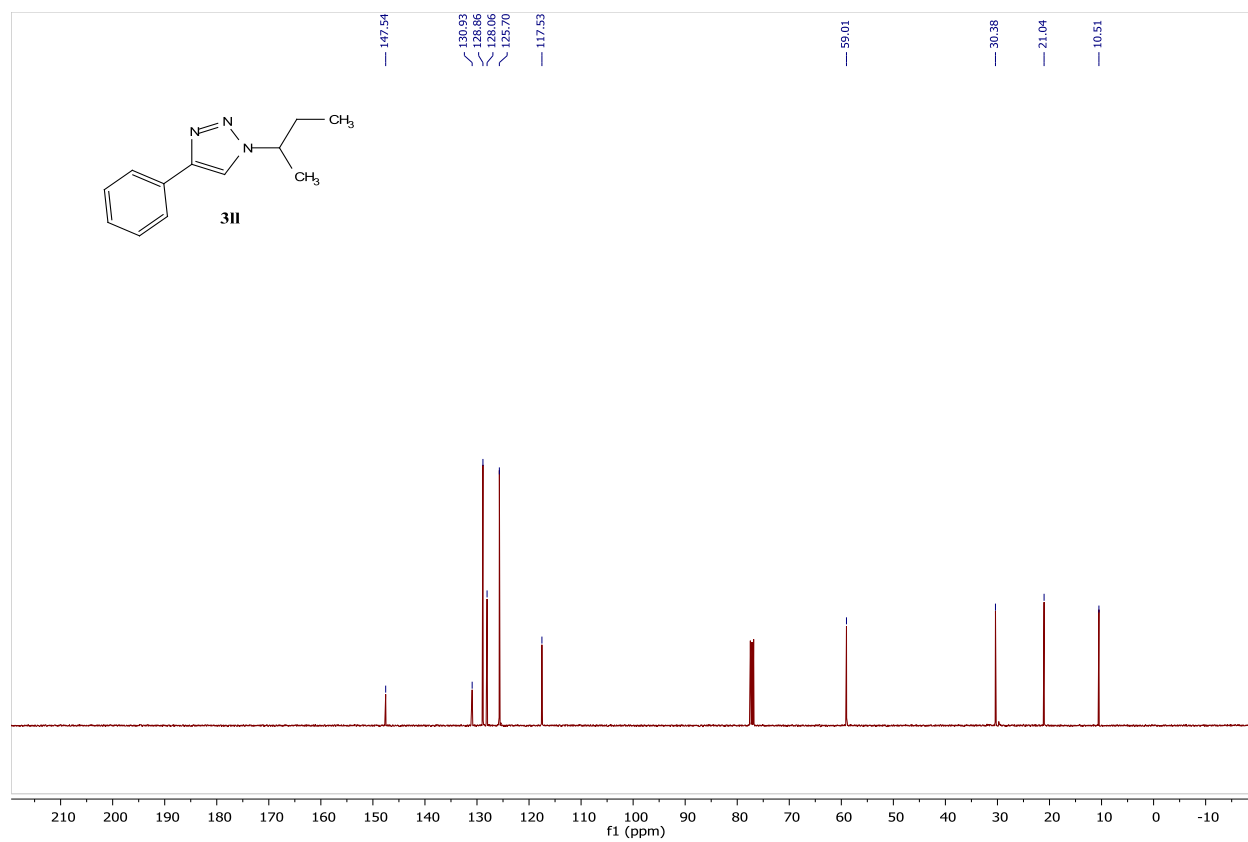

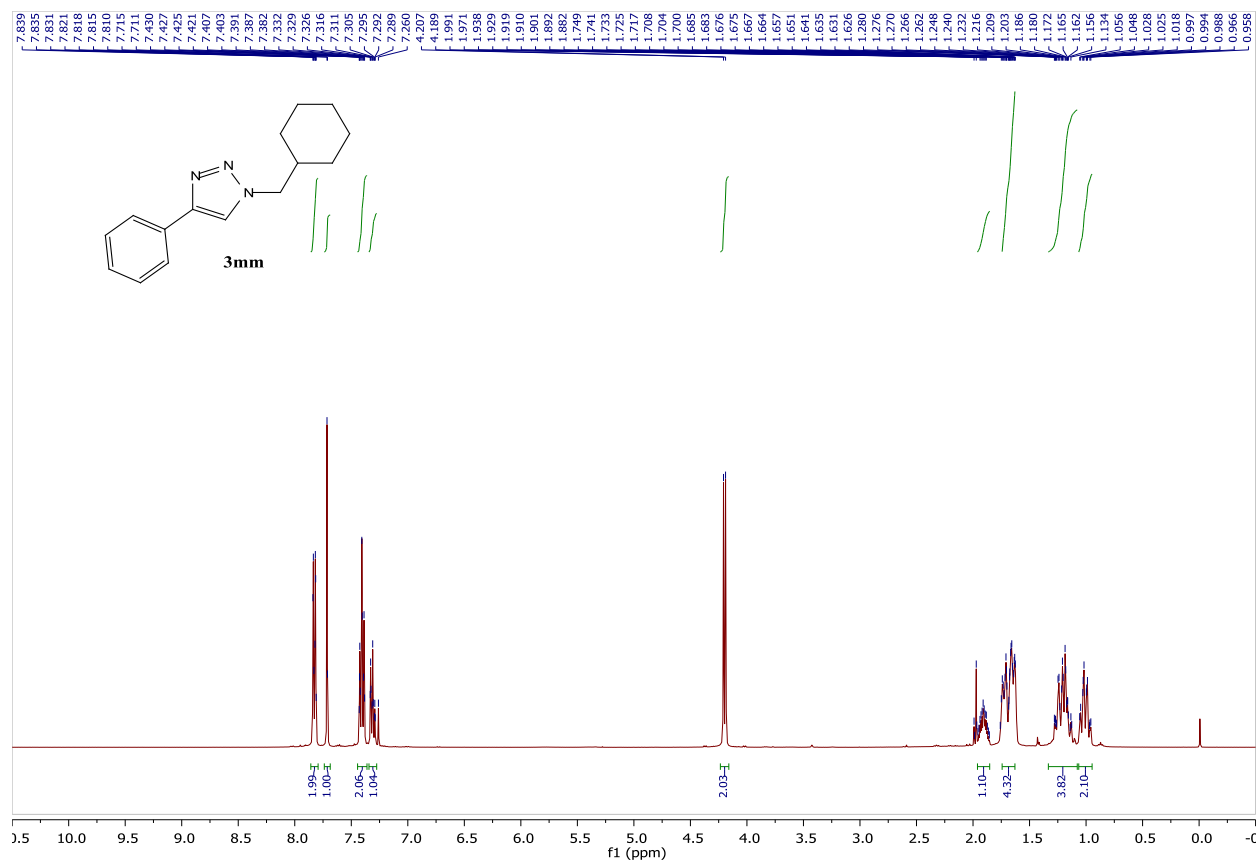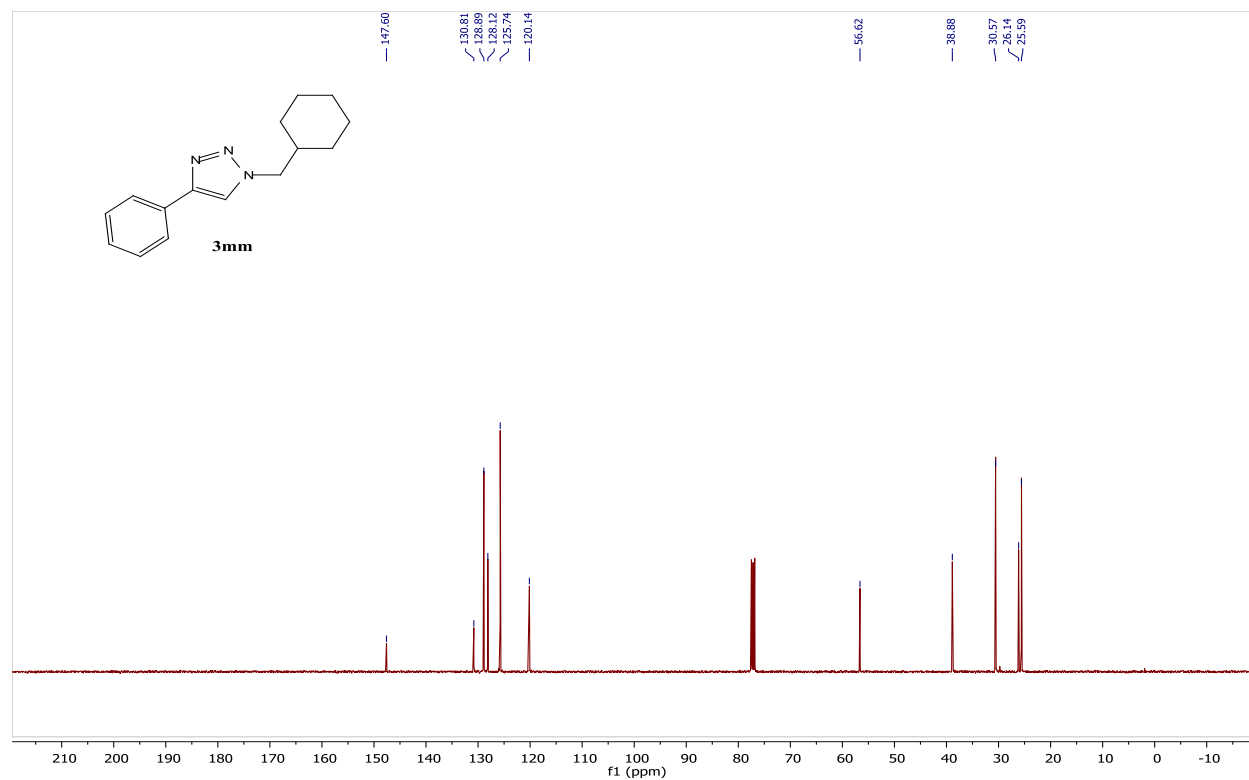

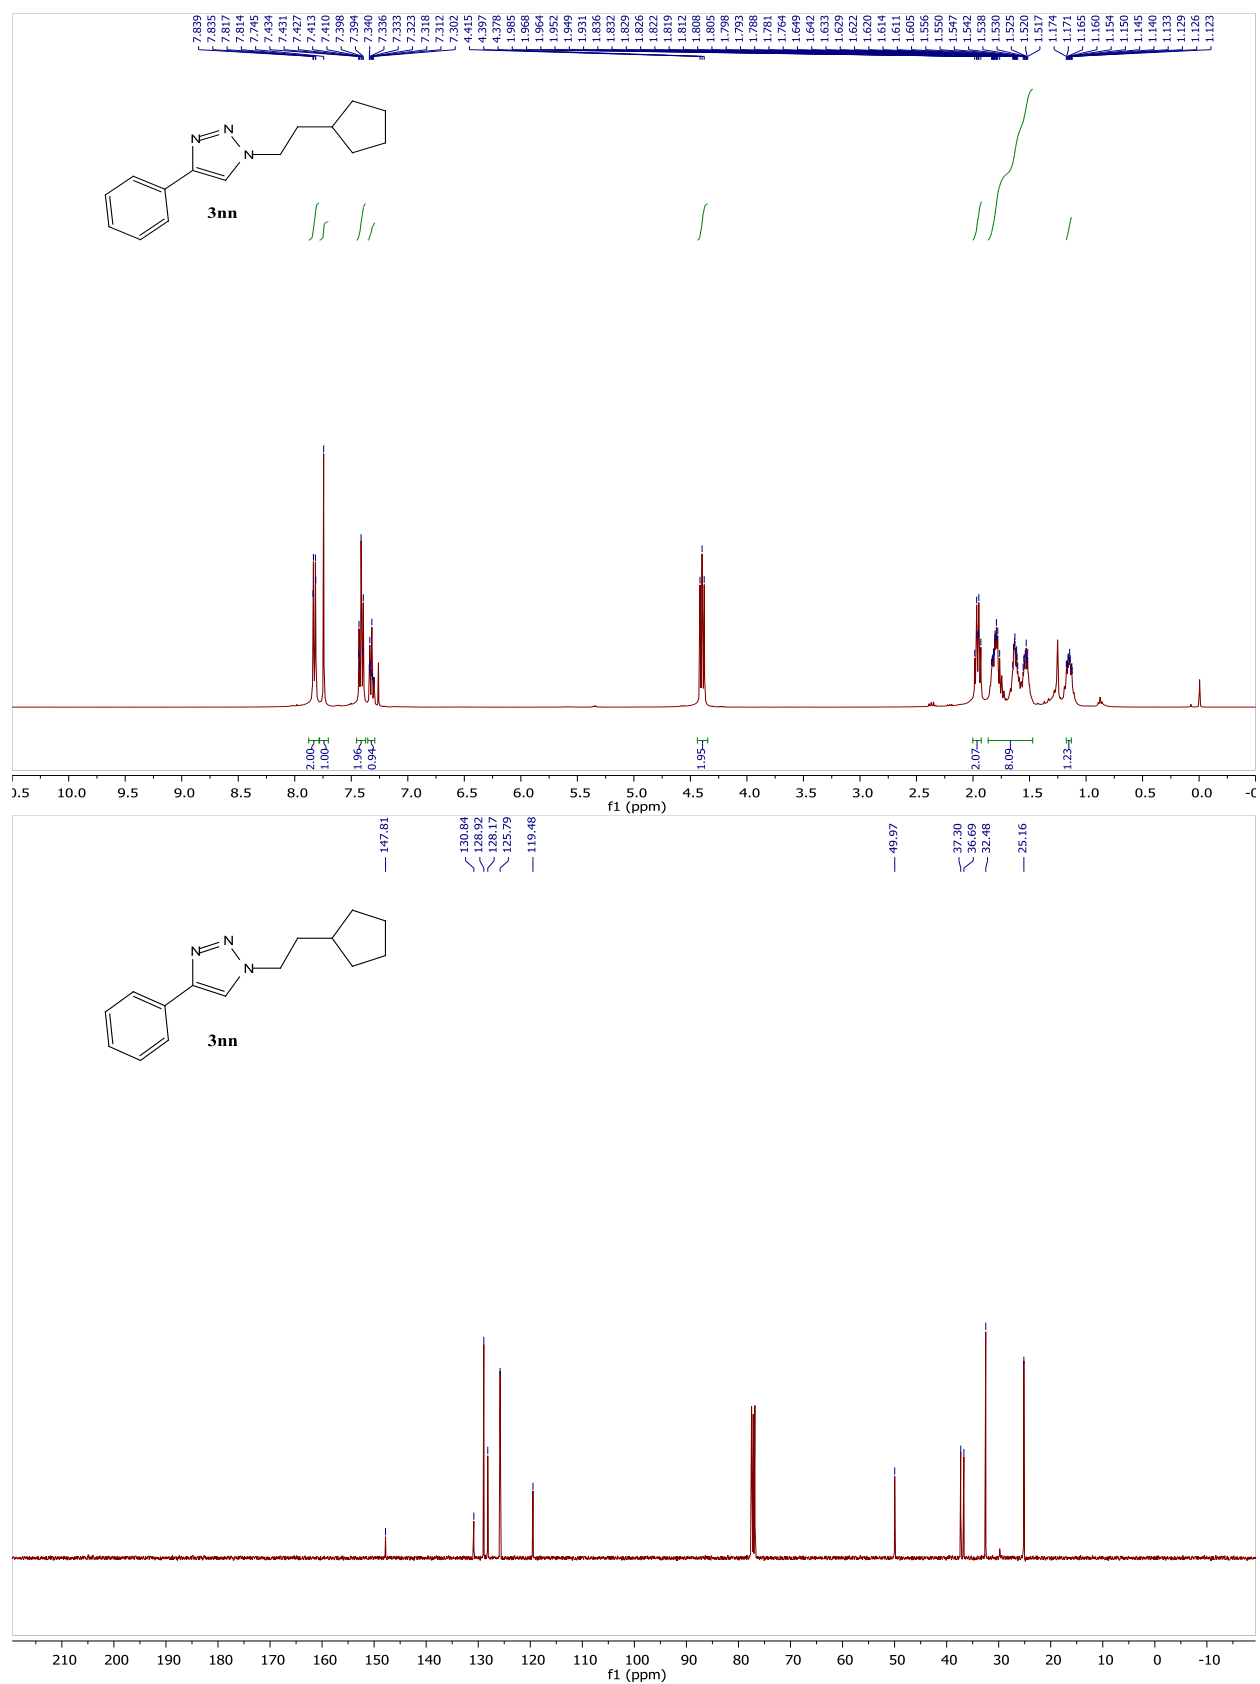



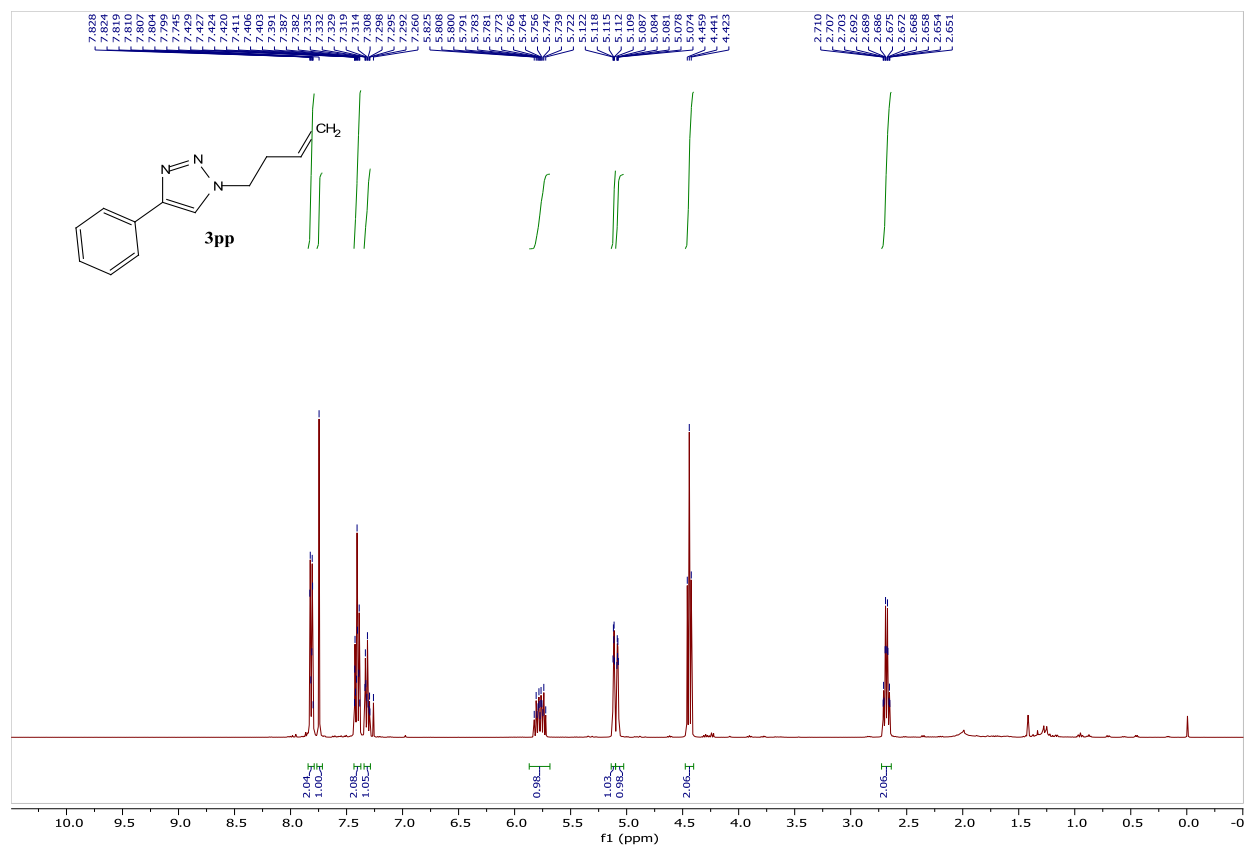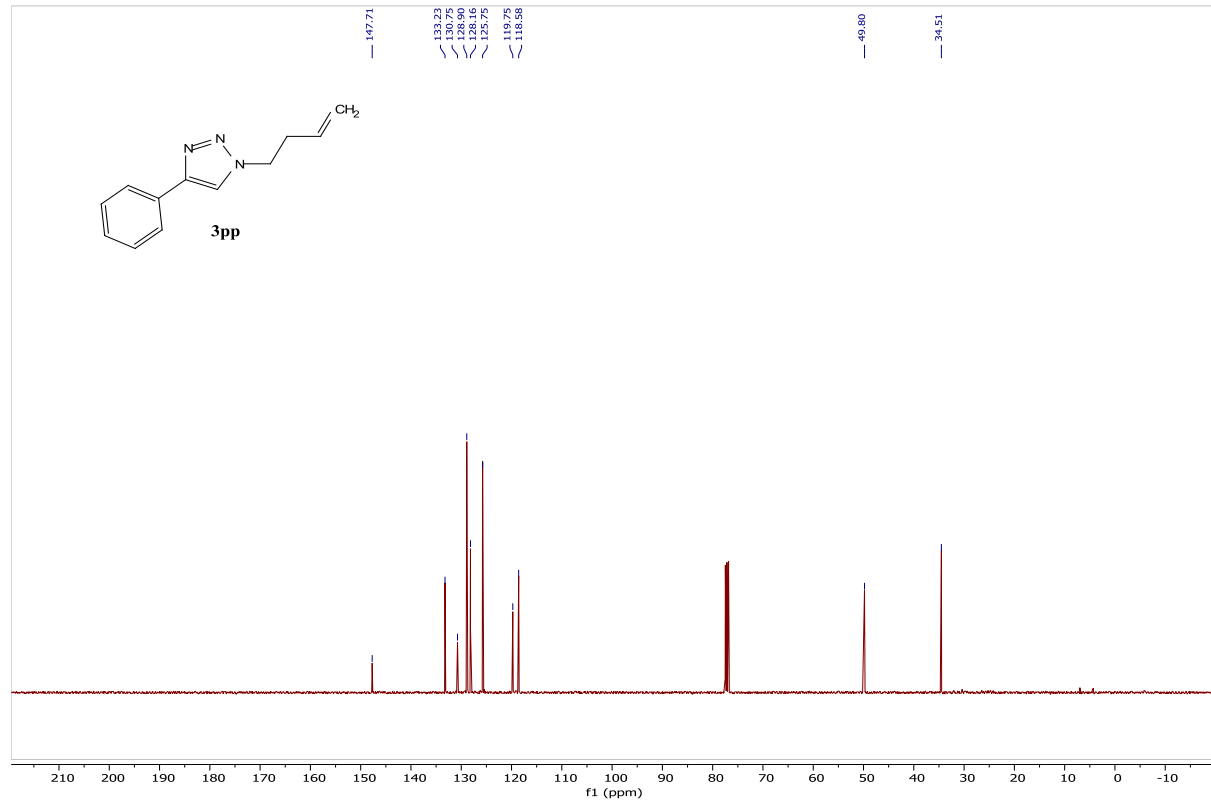

Supplement: Additional file 1 [file 1860-5397-14-270-S1.pdf]
